# Supplementary material for: Integrating density functional theory with machine learning for enhanced band gap prediction in metal oxides
Source: Royal Society of Chemistry journal article supplement (doi:10.1039/d4cp03397c), 2025-01-01
Supplement: d4cp03397c1.pdf [file d4cp03397c1.pdf]

*Supplementary Materials*

**Integrating Density Functional Theory with Machine Learning for Enhanced Band Gap Prediction in Metal Oxides**

*Chidozie Ezeakunne<sup>1</sup>, Bipin Lamichhane<sup>2</sup>, and Shyam Kattel<sup>1\*</sup>*

<sup>1</sup>Department of Physics, University of Central Florida, Orlando, FL 32816

<sup>2</sup>Department of Physics, Florida A&M University, Tallahassee, FL 32307

\* Corresponding author:

Shyam Kattel: shyam.kattel@ucf.edu

**Convergence Test:**

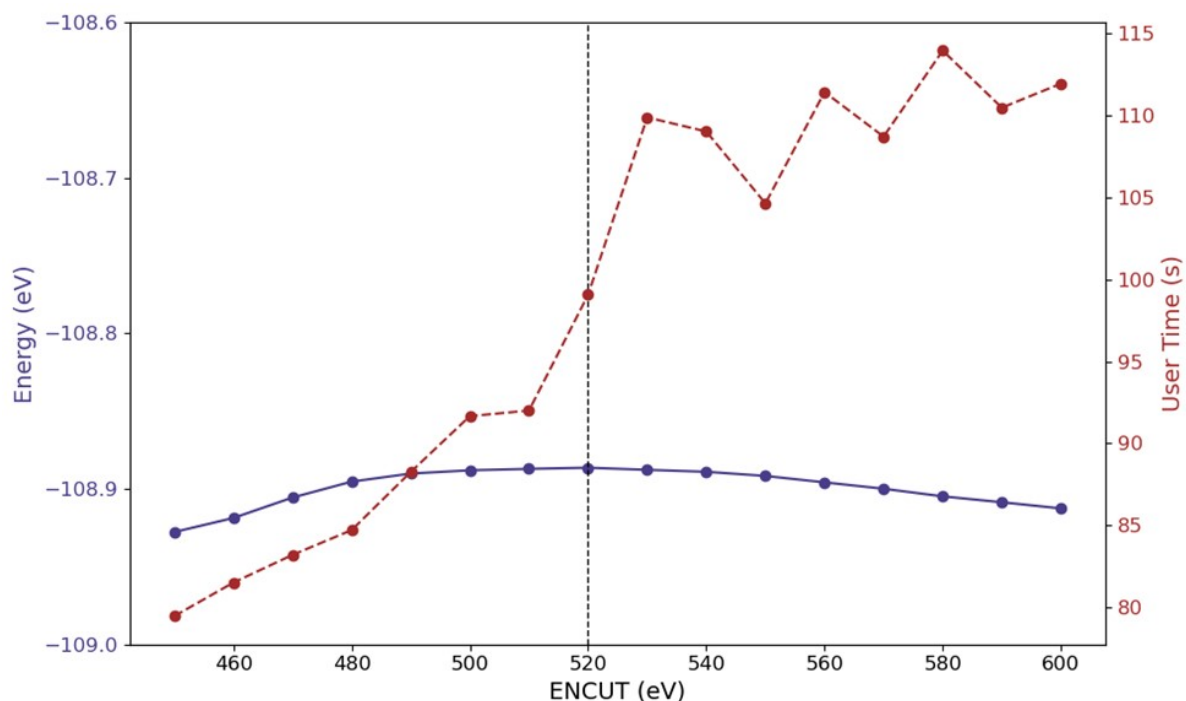

**Figure S1.** Convergence of Total Energy with Respect to Plane-Wave Cutoff Energy for c-ZnO.

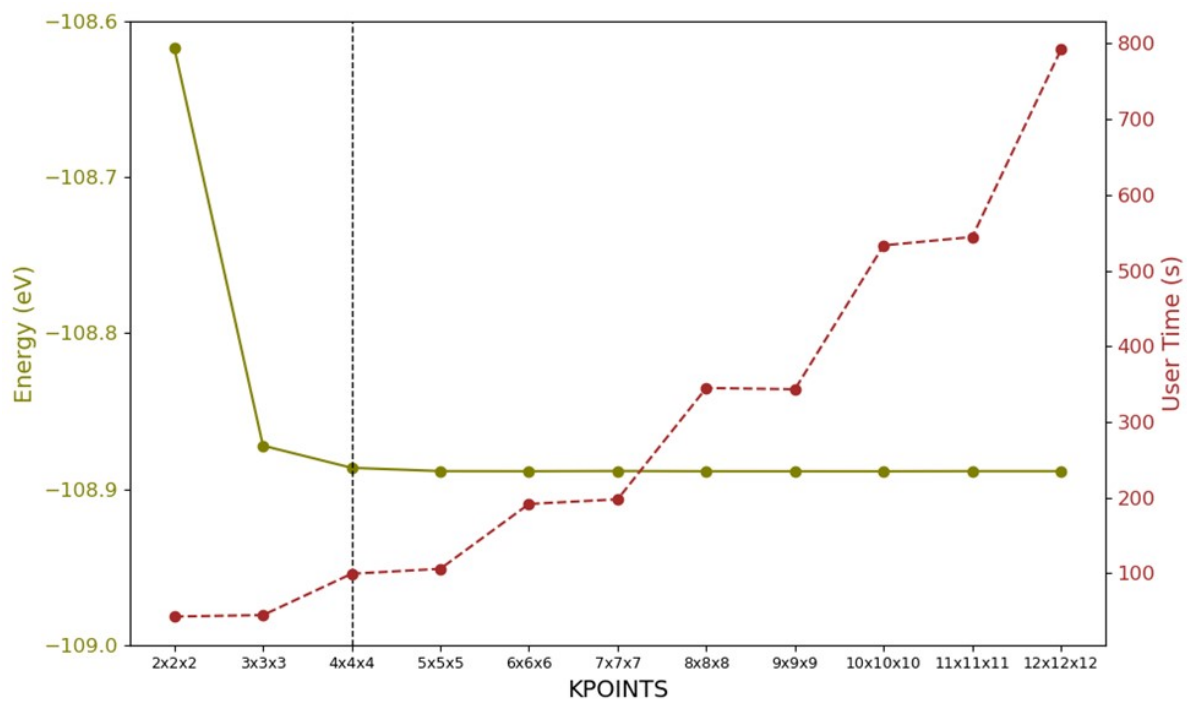

**Figure S2.** Convergence of Total Energy with Respect to K-Point Sampling for c-ZnO.

## Rutile TiO<sub>2</sub>:

rPBE:

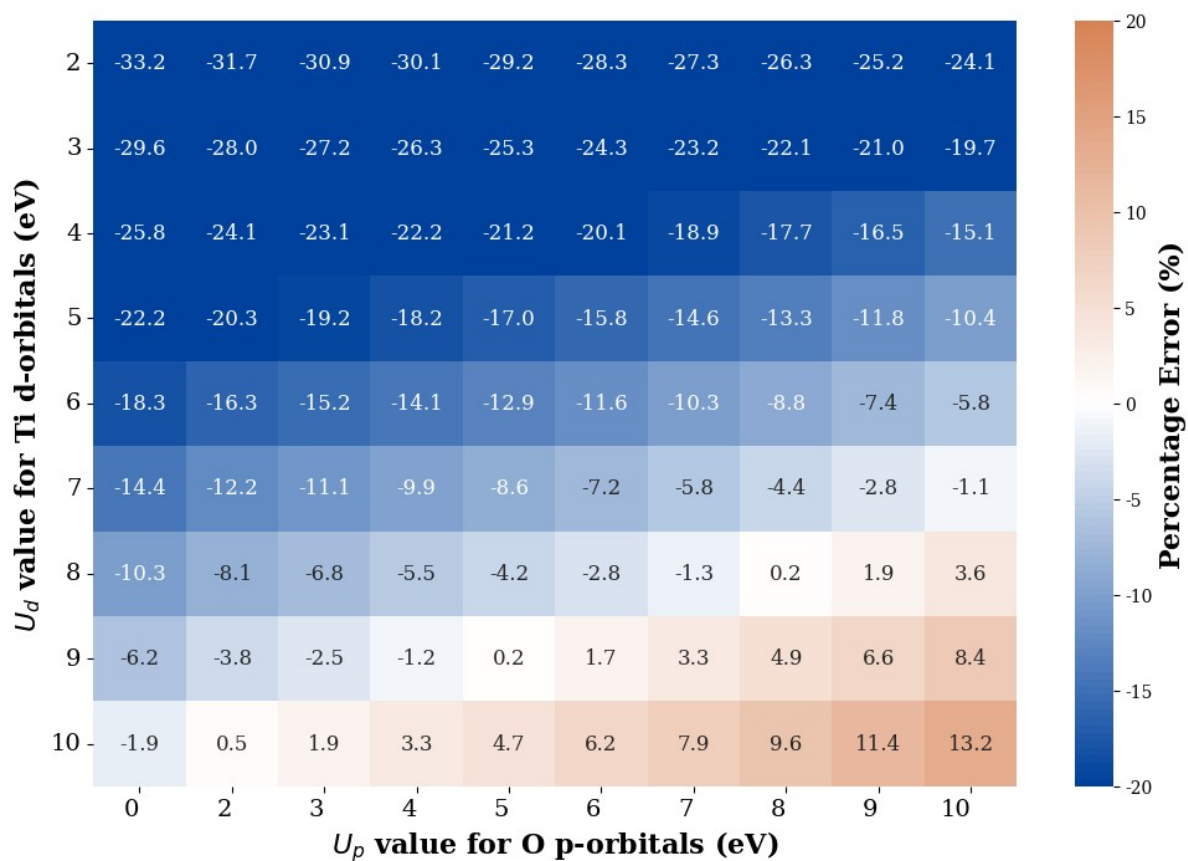

**Figure S3.** Heatmap of rPBE predicted band gap for rutile TiO<sub>2</sub> as a function of the  $U_d$  and  $U_p$  parameters.

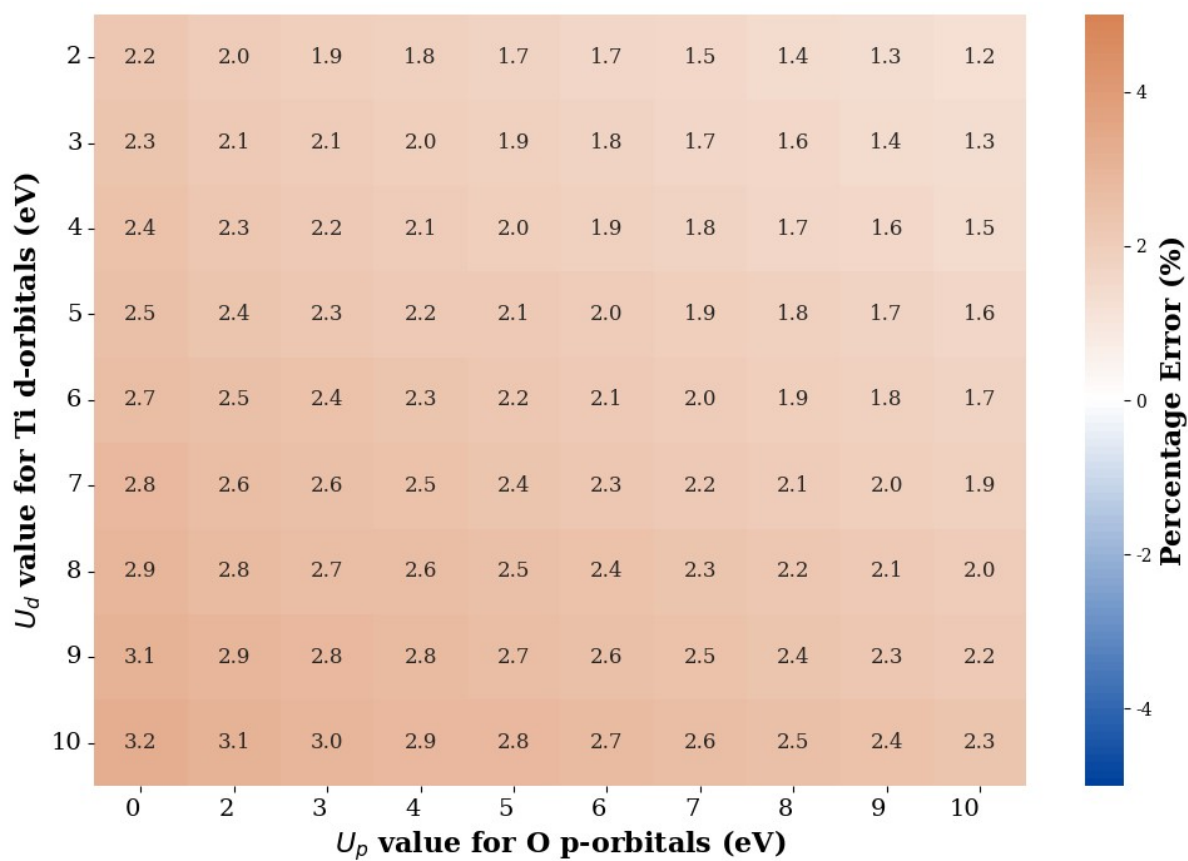

**Figure S4.** Heatmap of rPBE predicted lattice constant ( $a = b$ ) for rutile  $\text{TiO}_2$  as a function of the  $U_d$  and  $U_p$  parameters.

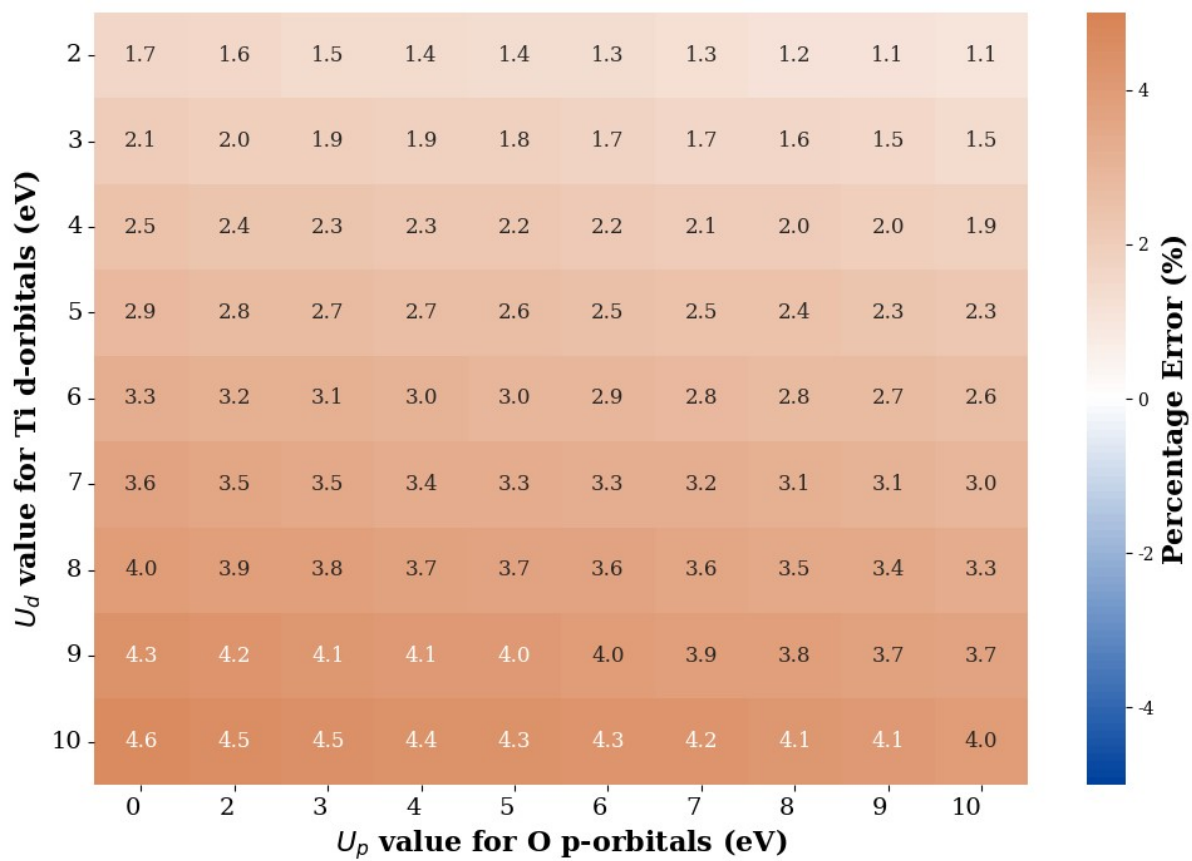

**Figure S5.** Heatmap of rPBE predicted lattice constant ( $c$ ) for rutile  $\text{TiO}_2$  as a function of the  $U_d$  and  $U_p$  parameters.

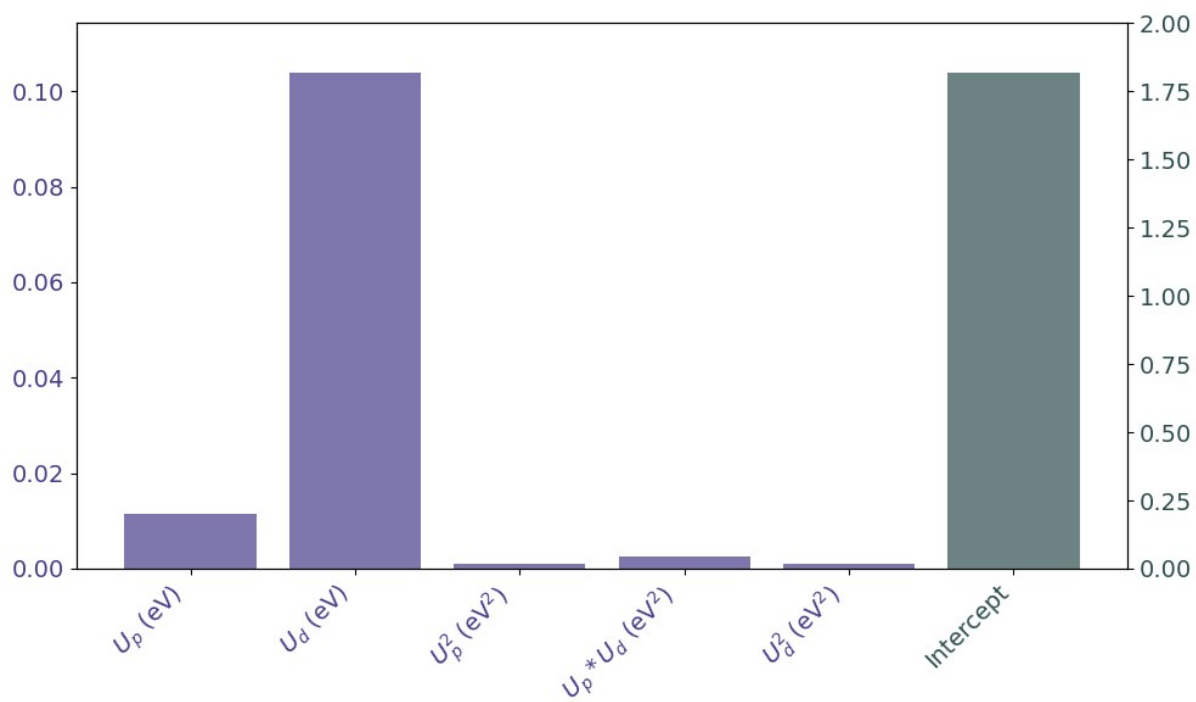

**Figure S6.** Feature importance of the PR model for predicting the rPBE band gap of rutile  $\text{TiO}_2$ . Lighter shades indicate features with negative contributions.

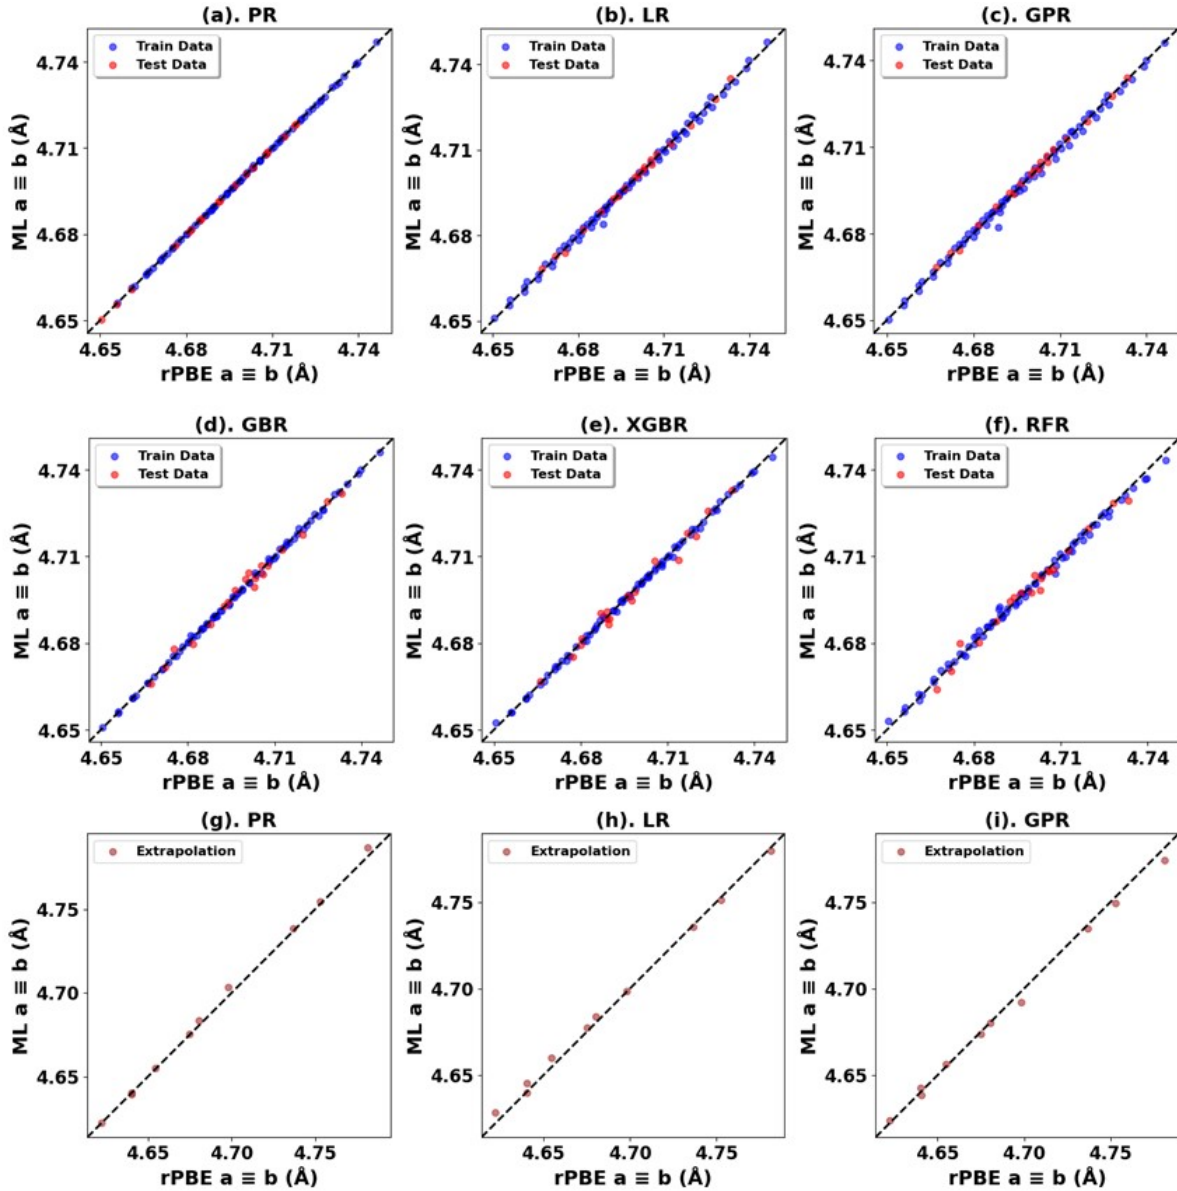

**Figure S7.** (a) - (f) Performance of models for rPBE lattice parameter ( $a = b$ ) prediction of rutile  $\text{TiO}_2$  using the initial range of  $U_p$  from 0.00 eV to 10.00 eV and  $U_d$  from 2.00 eV to 10.00 eV. (g) - (i) Performance of top three models in extrapolation using  $U_p$  and  $U_d$  values beyond these initial ranges.

**Table S1.** Comparative performance of models for rPBE lattice constant ( $a = b$ ) prediction in rutile  $\text{TiO}_2$ .

| Oxide                    | Model | Initial Range             |                          |                         |       | Extrapolation             |                          |                         |       |
|--------------------------|-------|---------------------------|--------------------------|-------------------------|-------|---------------------------|--------------------------|-------------------------|-------|
|                          |       | MSE<br>( $\text{\AA}^2$ ) | RMSE<br>( $\text{\AA}$ ) | MAE<br>( $\text{\AA}$ ) | $R^2$ | MSE<br>( $\text{\AA}^2$ ) | RMSE<br>( $\text{\AA}$ ) | MAE<br>( $\text{\AA}$ ) | $R^2$ |
| Rutile<br>$\text{TiO}_2$ | *PR   | 0.00                      | 0.00                     | 0.00                    | 1.00  | 0.00                      | 0.00                     | 0.00                    | 1.00  |
|                          | LR    | 0.00                      | 0.00                     | 0.00                    | 1.00  | 0.00                      | 0.00                     | 0.00                    | 1.00  |
|                          | GPR   | 0.00                      | 0.00                     | 0.00                    | 1.00  | 0.00                      | 0.00                     | 0.00                    | 1.00  |
|                          | GBR   | 0.00                      | 0.00                     | 0.00                    | 0.99  | 0.00                      | 0.02                     | 0.02                    | 0.82  |

|  |      |      |      |      |      |      |      |      |      |
|--|------|------|------|------|------|------|------|------|------|
|  | XGBR | 0.00 | 0.00 | 0.00 | 0.97 | 0.00 | 0.02 | 0.02 | 0.81 |
|  | RFR  | 0.00 | 0.00 | 0.00 | 0.97 | 0.00 | 0.02 | 0.02 | 0.80 |



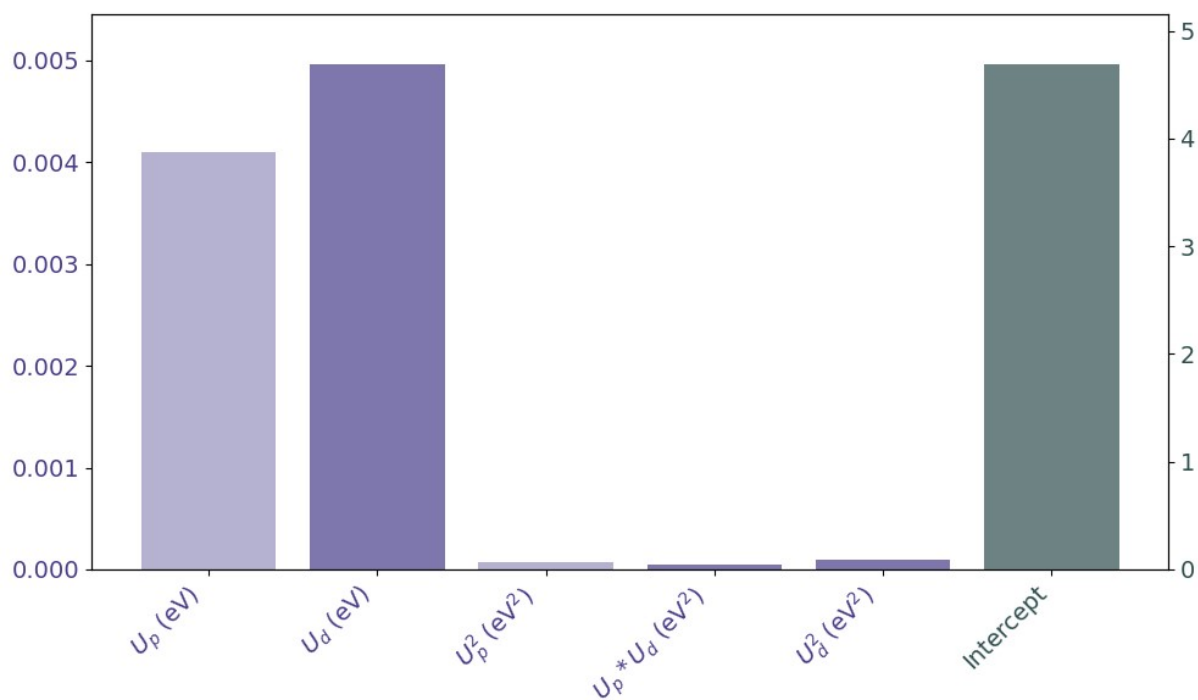

**Figure S8.** Feature importance of the PR model for predicting the rPBE lattice constant ( $a = b$ ) of rutile  $\text{TiO}_2$ . Lighter shades indicate features with negative contributions.

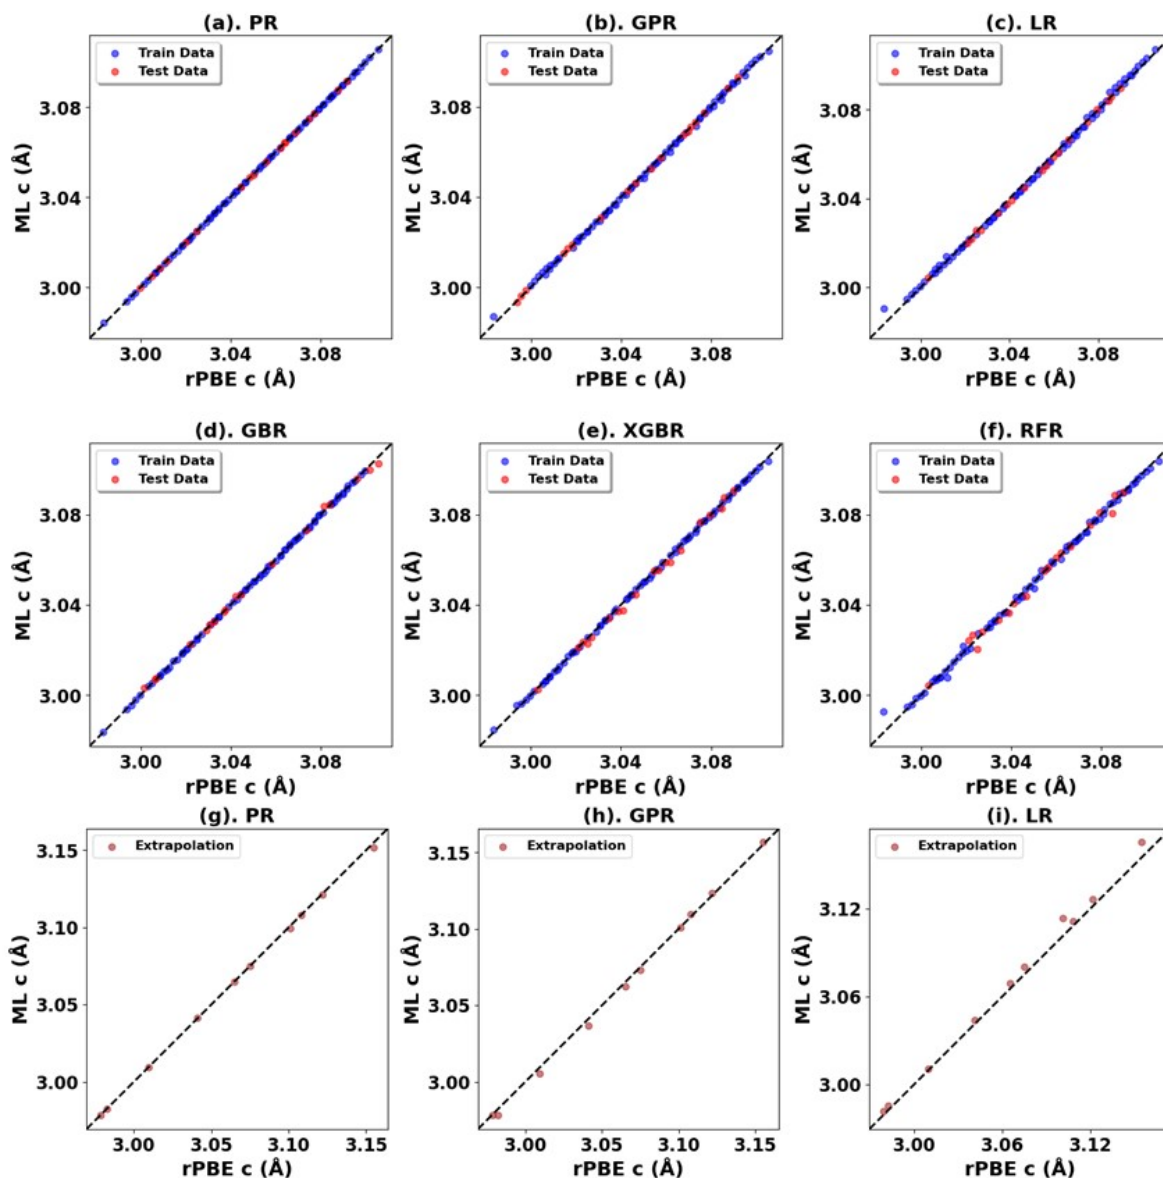

**Figure S9.** (a) - (f) Performance of models for rPBE lattice parameter (c) prediction of rutile  $\text{TiO}_2$  using the initial range of  $U_p$  from 0.00 eV to 10.00 eV and  $U_d$  from 2.00 eV to 10.00 eV. (g) - (i) Performance of top three models in extrapolation using  $U_p$  and  $U_d$  values beyond these initial ranges.

**Table S2.** Comparative performance of models for rPBE lattice constant (c) prediction in rutile  $\text{TiO}_2$ .

| Oxide                 | Model | Initial Range          |                       |                      |       | Extrapolation          |                       |                      |       |
|-----------------------|-------|------------------------|-----------------------|----------------------|-------|------------------------|-----------------------|----------------------|-------|
|                       |       | MSE ( $\text{\AA}^2$ ) | RMSE ( $\text{\AA}$ ) | MAE ( $\text{\AA}$ ) | $R^2$ | MSE ( $\text{\AA}^2$ ) | RMSE ( $\text{\AA}$ ) | MAE ( $\text{\AA}$ ) | $R^2$ |
| Rutile $\text{TiO}_2$ | PR    | 0.00                   | 0.00                  | 0.00                 | 1.00  | 0.00                   | 0.00                  | 0.00                 | 1.00  |
|                       | GPR   | 0.00                   | 0.00                  | 0.00                 | 1.00  | 0.00                   | 0.00                  | 0.00                 | 1.00  |
|                       | LR    | 0.00                   | 0.00                  | 0.00                 | 1.00  | 0.00                   | 0.01                  | 0.00                 | 0.99  |
|                       | GBR   | 0.00                   | 0.00                  | 0.00                 | 0.99  | 0.00                   | 0.02                  | 0.02                 | 0.88  |

|  |      |      |      |      |      |      |      |      |      |
|--|------|------|------|------|------|------|------|------|------|
|  | XGBR | 0.00 | 0.00 | 0.00 | 0.99 | 0.00 | 0.02 | 0.02 | 0.87 |
|  | RFR  | 0.00 | 0.00 | 0.00 | 0.99 | 0.00 | 0.02 | 0.02 | 0.87 |

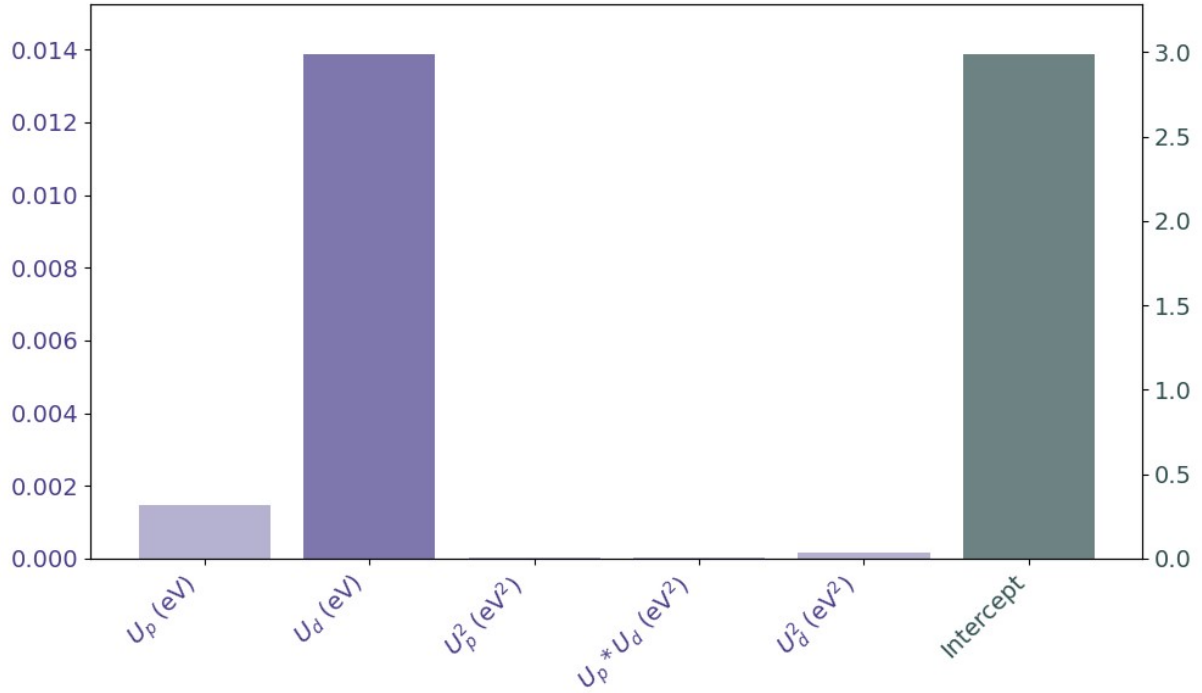

**Figure S10.** Feature importance of the PR model for predicting the rPBE lattice constant ( $c$ ) of rutile  $\text{TiO}_2$ . Lighter shades indicate features with negative contributions.

**Table S3.** Influence of  $U_d$  and  $U_p$  on rutile  $\text{TiO}_2$  DFT+U (rPBE) predicted lattice parameters ( $a = b$ ,  $c$ ) and bandgap ( $E_g$ )

| $U_d$ (eV) | $U_p$ (eV) | $a = b$ (Å) | $c$ (Å) | $E_g$ (eV) | % Deviation<br>in $a = b$ | % Deviation<br>in $c$ | % Deviation<br>in $E_g$ | % Deviation<br>in $c/a$ |
|------------|------------|-------------|---------|------------|---------------------------|-----------------------|-------------------------|-------------------------|
| 0          | 0          | 4.6886      | 2.9834  | 1.838      | 2.07                      | 0.73                  | -39.34                  | -1.31                   |
| 2          | 0          | 4.6976      | 3.0117  | 2.023      | 2.26                      | 1.68                  | -33.23                  | -0.56                   |
| 2          | 2          | 4.6892      | 3.0085  | 2.068      | 2.08                      | 1.58                  | -31.75                  | -0.49                   |
| 2          | 3          | 4.6846      | 3.0067  | 2.093      | 1.98                      | 1.52                  | -30.92                  | -0.45                   |
| 2          | 4          | 4.6801      | 3.0050  | 2.118      | 1.88                      | 1.46                  | -30.10                  | -0.41                   |
| 2          | 5          | 4.6753      | 3.0032  | 2.145      | 1.78                      | 1.40                  | -29.21                  | -0.37                   |
| 2          | 6          | 4.6710      | 3.0015  | 2.173      | 1.68                      | 1.34                  | -28.28                  | -0.34                   |
| 2          | 7          | 4.6660      | 2.9996  | 2.202      | 1.57                      | 1.28                  | -27.33                  | -0.29                   |
| 2          | 8          | 4.6610      | 2.9977  | 2.233      | 1.47                      | 1.21                  | -26.30                  | -0.25                   |
| 2          | 9          | 4.6559      | 2.9958  | 2.266      | 1.35                      | 1.15                  | -25.21                  | -0.20                   |
| 2          | 10         | 4.6506      | 2.9937  | 2.301      | 1.24                      | 1.08                  | -24.06                  | -0.16                   |
| 3          | 0          | 4.7028      | 3.0250  | 2.132      | 2.38                      | 2.13                  | -29.64                  | -0.24                   |
| 3          | 2          | 4.6944      | 3.0217  | 2.181      | 2.19                      | 2.02                  | -28.02                  | -0.17                   |
| 3          | 3          | 4.6900      | 3.0200  | 2.207      | 2.10                      | 1.96                  | -27.16                  | -0.13                   |
| 3          | 4          | 4.6855      | 3.0182  | 2.234      | 2.00                      | 1.90                  | -26.27                  | -0.09                   |

|   |    |        |        |       |      |      |        |       |
|---|----|--------|--------|-------|------|------|--------|-------|
| 3 | 5  | 4.6809 | 3.0164 | 2.263 | 1.90 | 1.84 | -25.31 | -0.05 |
| 3 | 6  | 4.6761 | 3.0145 | 2.294 | 1.79 | 1.78 | -24.29 | -0.01 |
| 3 | 7  | 4.6713 | 3.0126 | 2.326 | 1.69 | 1.71 | -23.23 | 0.02  |
| 3 | 8  | 4.6661 | 3.0104 | 2.36  | 1.58 | 1.64 | -22.11 | 0.06  |
| 3 | 9  | 4.6610 | 3.0084 | 2.395 | 1.47 | 1.57 | -20.96 | 0.11  |
| 3 | 10 | 4.6561 | 3.0064 | 2.433 | 1.36 | 1.51 | -19.70 | 0.15  |
| 4 | 0  | 4.7080 | 3.0377 | 2.247 | 2.49 | 2.56 | -25.84 | 0.07  |
| 4 | 2  | 4.6999 | 3.0345 | 2.3   | 2.31 | 2.45 | -24.09 | 0.14  |
| 4 | 3  | 4.6955 | 3.0327 | 2.329 | 2.22 | 2.39 | -23.14 | 0.17  |
| 4 | 4  | 4.6911 | 3.0309 | 2.358 | 2.12 | 2.33 | -22.18 | 0.21  |
| 4 | 5  | 4.6865 | 3.0290 | 2.389 | 2.02 | 2.27 | -21.16 | 0.24  |
| 4 | 6  | 4.6818 | 3.0271 | 2.422 | 1.92 | 2.20 | -20.07 | 0.28  |
| 4 | 7  | 4.6771 | 3.0251 | 2.456 | 1.82 | 2.14 | -18.94 | 0.32  |
| 4 | 8  | 4.6721 | 3.0229 | 2.493 | 1.71 | 2.06 | -17.72 | 0.35  |
| 4 | 9  | 4.6672 | 3.0209 | 2.531 | 1.60 | 2.00 | -16.47 | 0.39  |
| 4 | 10 | 4.6621 | 3.0187 | 2.572 | 1.49 | 1.92 | -15.12 | 0.43  |
| 5 | 0  | 4.7138 | 3.0501 | 2.358 | 2.61 | 2.98 | -22.18 | 0.36  |
| 5 | 2  | 4.7055 | 3.0466 | 2.416 | 2.43 | 2.86 | -20.26 | 0.42  |
| 5 | 3  | 4.7013 | 3.0448 | 2.447 | 2.34 | 2.80 | -19.24 | 0.45  |
| 5 | 4  | 4.6969 | 3.0429 | 2.48  | 2.25 | 2.74 | -18.15 | 0.48  |
| 5 | 5  | 4.6924 | 3.0409 | 2.514 | 2.15 | 2.67 | -17.03 | 0.51  |
| 5 | 6  | 4.6878 | 3.0389 | 2.55  | 2.05 | 2.60 | -15.84 | 0.54  |
| 5 | 7  | 4.6831 | 3.0369 | 2.588 | 1.95 | 2.54 | -14.59 | 0.58  |
| 5 | 8  | 4.6783 | 3.0348 | 2.628 | 1.84 | 2.47 | -13.27 | 0.61  |
| 5 | 9  | 4.6734 | 3.0327 | 2.671 | 1.73 | 2.39 | -11.85 | 0.65  |
| 5 | 10 | 4.6684 | 3.0307 | 2.715 | 1.63 | 2.32 | -10.40 | 0.69  |
| 6 | 0  | 4.7199 | 3.0620 | 2.474 | 2.75 | 3.38 | -18.35 | 0.62  |
| 6 | 2  | 4.7118 | 3.0584 | 2.536 | 2.57 | 3.26 | -16.30 | 0.67  |
| 6 | 3  | 4.7076 | 3.0566 | 2.569 | 2.48 | 3.20 | -15.21 | 0.70  |
| 6 | 4  | 4.7033 | 3.0546 | 2.604 | 2.39 | 3.13 | -14.06 | 0.73  |
| 6 | 5  | 4.6988 | 3.0527 | 2.64  | 2.29 | 3.07 | -12.87 | 0.76  |
| 6 | 6  | 4.6943 | 3.0506 | 2.678 | 2.19 | 3.00 | -11.62 | 0.79  |
| 6 | 7  | 4.6896 | 3.0486 | 2.719 | 2.09 | 2.93 | -10.26 | 0.82  |
| 6 | 8  | 4.6848 | 3.0464 | 2.762 | 1.98 | 2.86 | -8.84  | 0.86  |
| 6 | 9  | 4.6801 | 3.0444 | 2.806 | 1.88 | 2.79 | -7.39  | 0.89  |
| 6 | 10 | 4.6750 | 3.0422 | 2.854 | 1.77 | 2.71 | -5.81  | 0.93  |
| 7 | 0  | 4.7265 | 3.0735 | 2.594 | 2.89 | 3.77 | -14.39 | 0.86  |
| 7 | 2  | 4.7184 | 3.0699 | 2.659 | 2.71 | 3.65 | -12.24 | 0.91  |
| 7 | 3  | 4.7142 | 3.0680 | 2.694 | 2.62 | 3.58 | -11.09 | 0.94  |
| 7 | 4  | 4.7098 | 3.0660 | 2.731 | 2.53 | 3.52 | -9.87  | 0.97  |
| 7 | 5  | 4.7055 | 3.0640 | 2.77  | 2.43 | 3.45 | -8.58  | 0.99  |
| 7 | 6  | 4.7010 | 3.0620 | 2.811 | 2.34 | 3.38 | -7.23  | 1.02  |
| 7 | 7  | 4.6964 | 3.0599 | 2.853 | 2.24 | 3.31 | -5.84  | 1.05  |
| 7 | 8  | 4.6917 | 3.0577 | 2.898 | 2.13 | 3.24 | -4.36  | 1.08  |
| 7 | 9  | 4.6869 | 3.0557 | 2.946 | 2.03 | 3.17 | -2.77  | 1.12  |
| 7 | 10 | 4.6819 | 3.0534 | 2.996 | 1.92 | 3.09 | -1.12  | 1.15  |

|    |    |        |        |       |      |      |        |      |
|----|----|--------|--------|-------|------|------|--------|------|
| 8  | 0  | 4.7333 | 3.0847 | 2.717 | 3.04 | 4.15 | -10.33 | 1.08 |
| 8  | 2  | 4.7252 | 3.0810 | 2.786 | 2.86 | 4.02 | -8.05  | 1.13 |
| 8  | 3  | 4.7211 | 3.0791 | 2.823 | 2.77 | 3.96 | -6.83  | 1.16 |
| 8  | 4  | 4.7168 | 3.0771 | 2.862 | 2.68 | 3.89 | -5.54  | 1.18 |
| 8  | 5  | 4.7124 | 3.0751 | 2.902 | 2.58 | 3.83 | -4.22  | 1.21 |
| 8  | 6  | 4.7079 | 3.0730 | 2.945 | 2.49 | 3.75 | -2.81  | 1.24 |
| 8  | 7  | 4.7033 | 3.0708 | 2.99  | 2.39 | 3.68 | -1.32  | 1.27 |
| 8  | 8  | 4.6988 | 3.0689 | 3.037 | 2.29 | 3.61 | 0.23   | 1.30 |
| 8  | 9  | 4.6938 | 3.0664 | 3.087 | 2.18 | 3.53 | 1.88   | 1.32 |
| 8  | 10 | 4.6890 | 3.0644 | 3.14  | 2.07 | 3.46 | 3.63   | 1.36 |
| 9  | 0  | 4.7398 | 3.0951 | 2.843 | 3.18 | 4.50 | -6.17  | 1.28 |
| 9  | 2  | 4.7323 | 3.0917 | 2.914 | 3.02 | 4.39 | -3.83  | 1.33 |
| 9  | 3  | 4.7282 | 3.0898 | 2.954 | 2.93 | 4.32 | -2.51  | 1.36 |
| 9  | 4  | 4.7239 | 3.0879 | 2.994 | 2.83 | 4.26 | -1.19  | 1.38 |
| 9  | 5  | 4.7196 | 3.0858 | 3.037 | 2.74 | 4.19 | 0.23   | 1.41 |
| 9  | 6  | 4.7151 | 3.0837 | 3.082 | 2.64 | 4.12 | 1.72   | 1.44 |
| 9  | 7  | 4.7105 | 3.0815 | 3.129 | 2.54 | 4.04 | 3.27   | 1.46 |
| 9  | 8  | 4.7058 | 3.0794 | 3.178 | 2.44 | 3.97 | 4.88   | 1.49 |
| 9  | 9  | 4.7010 | 3.0771 | 3.231 | 2.34 | 3.89 | 6.63   | 1.52 |
| 9  | 10 | 4.6961 | 3.0747 | 3.286 | 2.23 | 3.81 | 8.45   | 1.55 |
| 10 | 0  | 4.7463 | 3.1055 | 2.972 | 3.32 | 4.85 | -1.91  | 1.48 |
| 10 | 2  | 4.7390 | 3.1017 | 3.046 | 3.16 | 4.72 | 0.53   | 1.51 |
| 10 | 3  | 4.7350 | 3.0998 | 3.087 | 3.08 | 4.66 | 1.88   | 1.54 |
| 10 | 4  | 4.7308 | 3.0978 | 3.129 | 2.98 | 4.59 | 3.27   | 1.56 |
| 10 | 5  | 4.7269 | 3.0962 | 3.172 | 2.90 | 4.54 | 4.69   | 1.59 |
| 10 | 6  | 4.7224 | 3.0941 | 3.219 | 2.80 | 4.47 | 6.24   | 1.62 |
| 10 | 7  | 4.7179 | 3.0919 | 3.268 | 2.70 | 4.39 | 7.85   | 1.64 |
| 10 | 8  | 4.7132 | 3.0897 | 3.32  | 2.60 | 4.32 | 9.57   | 1.67 |
| 10 | 9  | 4.7084 | 3.0874 | 3.374 | 2.50 | 4.24 | 11.35  | 1.70 |
| 10 | 10 | 4.7035 | 3.0851 | 3.431 | 2.39 | 4.16 | 13.23  | 1.73 |

**Table S4.** Influence of  $U_d$  and  $U_p$  on rutile  $\text{TiO}_2$  DFT+U (rPBE) predicted lattice parameters ( $a = b, c$ ) and bandgap ( $E_g$ ) [Extrapolation]

| $U_d$ (eV) | $U_p$ (eV) | $a = b$ (Å) | $c$ (Å) | $E_g$ (eV) |
|------------|------------|-------------|---------|------------|
| 1          | 11         | 4.6404      | 2.9786  | 2.21       |
| 2          | 15         | 4.6221      | 2.9823  | 2.509      |

|    |    |        |        |       |
|----|----|--------|--------|-------|
| 4  | 14 | 4.6403 | 3.0093 | 2.762 |
| 7  | 15 | 4.6547 | 3.0412 | 3.295 |
| 9  | 14 | 4.6750 | 3.0651 | 3.539 |
| 10 | 14 | 4.6803 | 3.0750 | 3.697 |
| 11 | 4  | 4.7368 | 3.1080 | 3.265 |
| 12 | 2  | 4.7528 | 3.1218 | 3.31  |
| 13 | 15 | 4.6983 | 3.1012 | 4.232 |
| 15 | 0  | 4.7816 | 3.1551 | 3.616 |

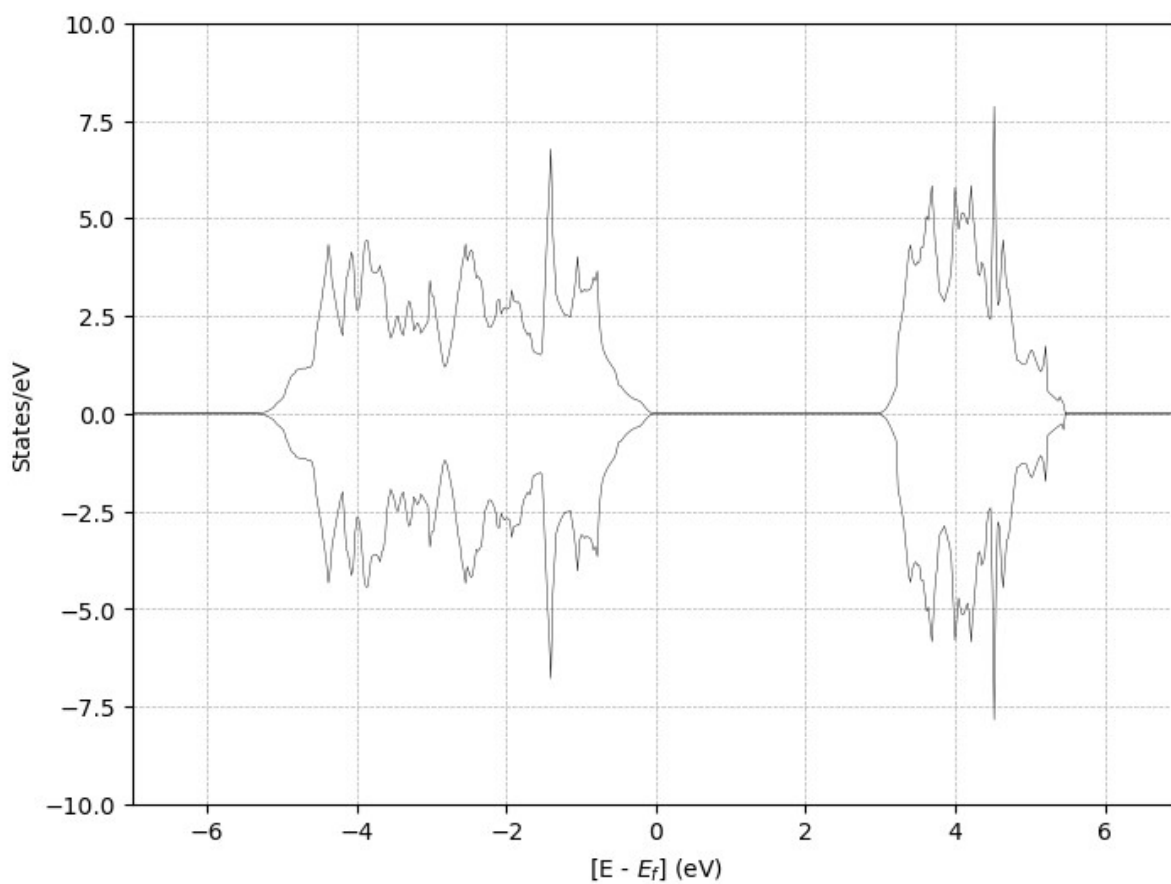

**Figure S11.** DOS for rutile  $\text{TiO}_2$  with rPBE functional:  $U_p = 8 \text{ eV}$ ,  $U_d = 8 \text{ eV}$

PBE:

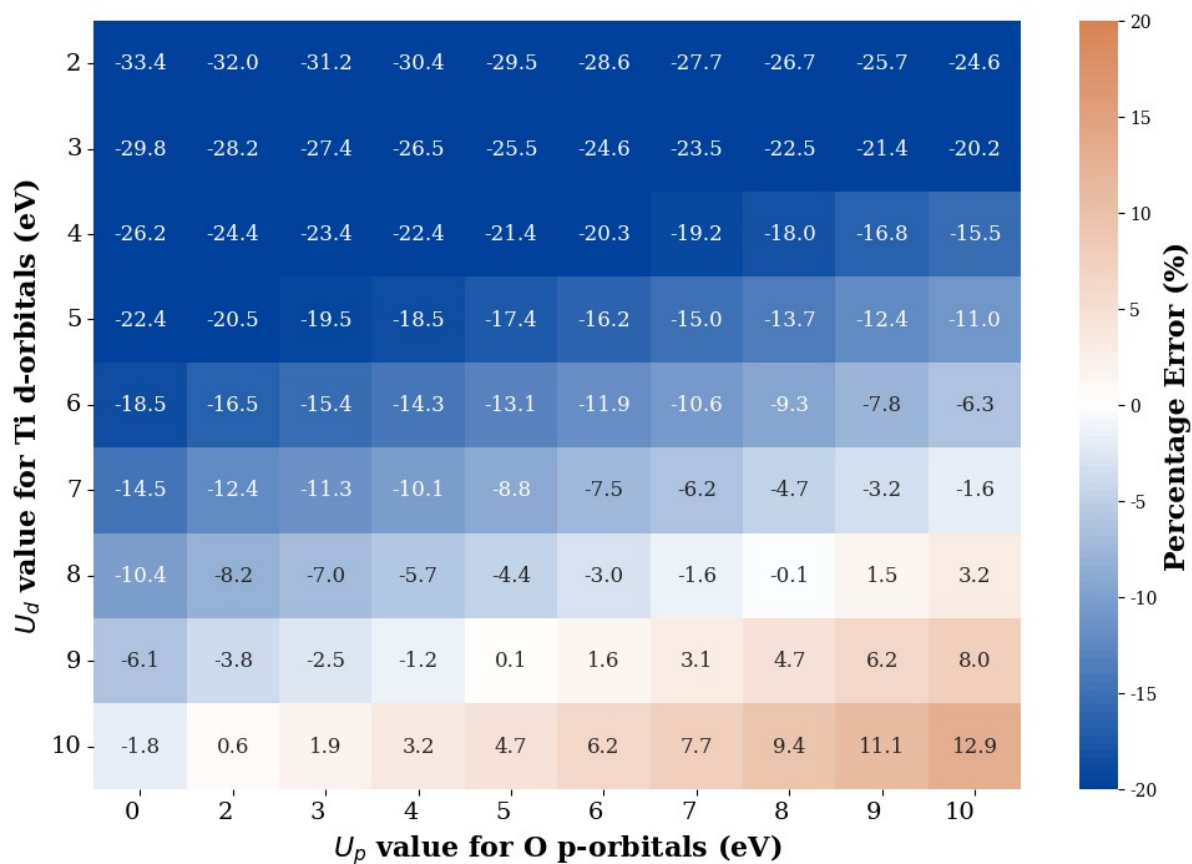

**Figure S12.** Heatmap of PBE predicted band gap for rutile TiO<sub>2</sub> as a function of the  $U_d$  and  $U_p$  parameters.

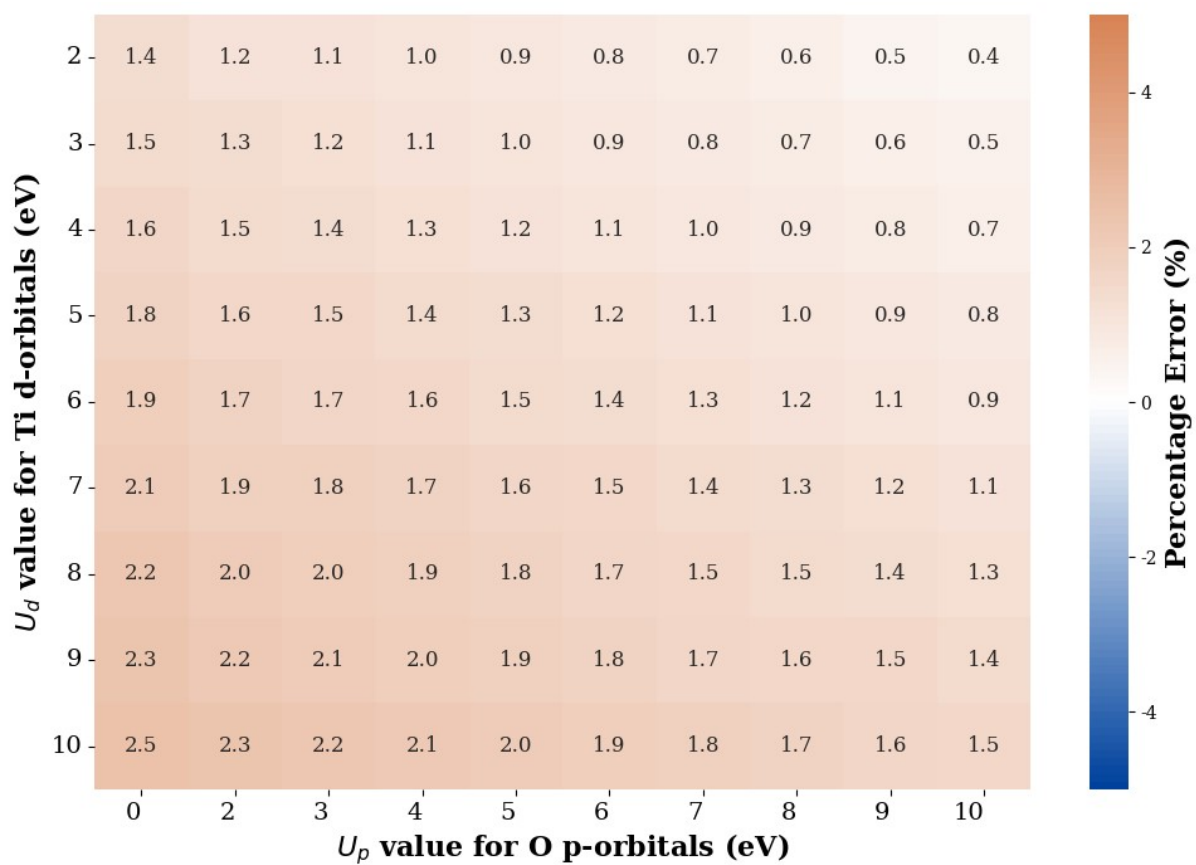

**Figure S13.** Heatmap of PBE predicted lattice constant ( $a = b$ ) for rutile  $\text{TiO}_2$  as a function of the  $U_d$  and  $U_p$  parameters.



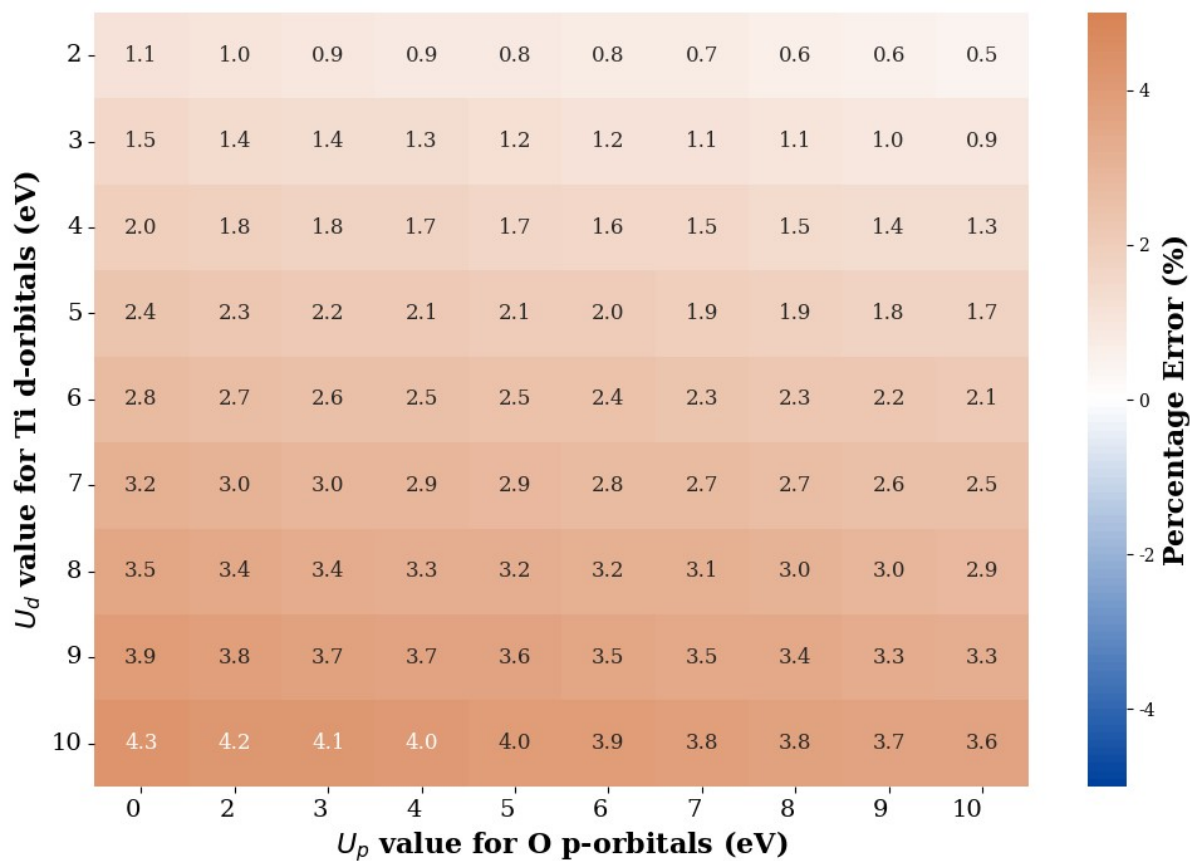

**Figure S14.** Heatmap of PBE predicted lattice constant ( $c$ ) for rutile  $\text{TiO}_2$  as a function of the  $U_d$  and  $U_p$  parameters.

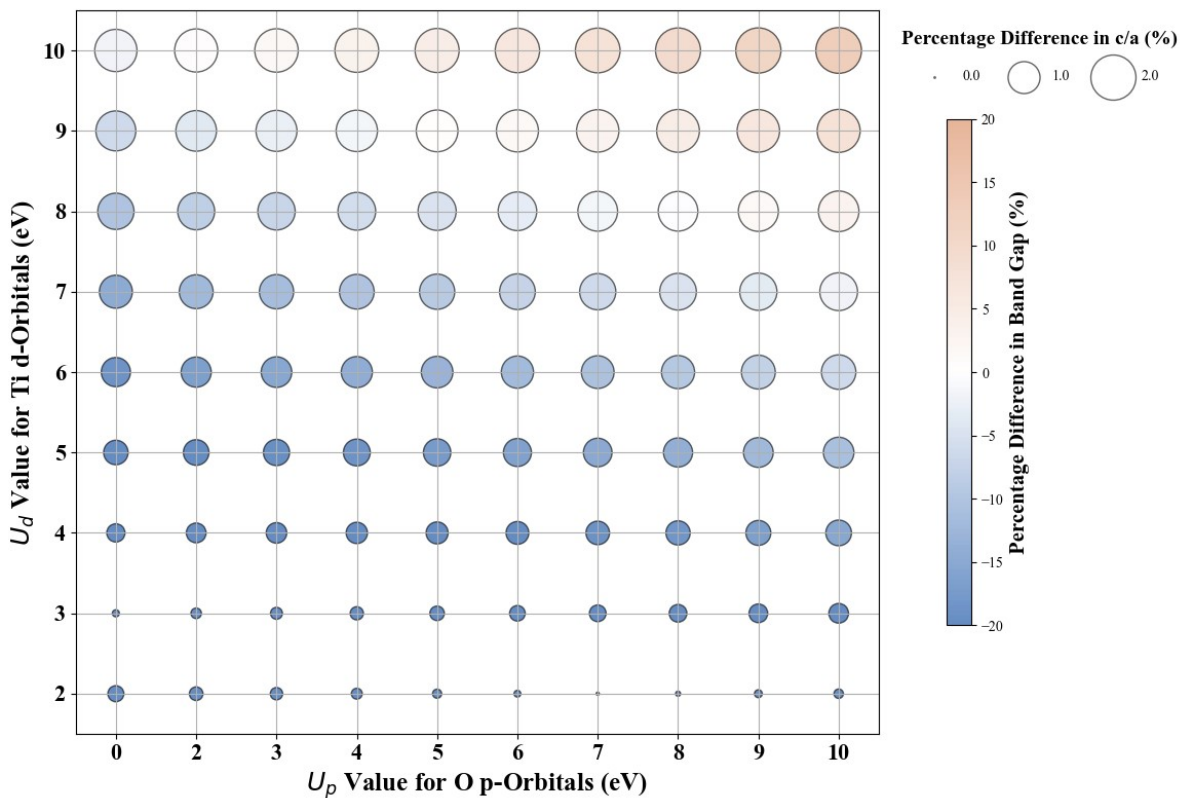

**Figure S15.** Effect of Hubbard U values on PBE band gap and lattice parameters of rutile TiO<sub>2</sub>.**Table S5.** Influence of U<sub>d</sub> and U<sub>p</sub> on rutile TiO<sub>2</sub> DFT+U (PBE) predicted lattice parameters (a = b, c) and bandgap (E<sub>g</sub>)

| U <sub>d</sub> (eV) | U <sub>p</sub> (eV) | a = b (Å) | c (Å)  | E <sub>g</sub> (eV) | % Deviation<br>in a = b | % Deviation<br>in c | % Deviation<br>in E <sub>g</sub> | % Deviation<br>in c/a |
|---------------------|---------------------|-----------|--------|---------------------|-------------------------|---------------------|----------------------------------|-----------------------|
| 0                   | 0                   | 4.6459    | 2.9677 | 1.826               | 1.14                    | 0.20                | -39.74                           | -0.93                 |
| 2                   | 0                   | 4.6566    | 2.9947 | 2.017               | 1.37                    | 1.11                | -33.43                           | -0.25                 |
| 2                   | 2                   | 4.6482    | 2.9914 | 2.061               | 1.19                    | 1.00                | -31.98                           | -0.18                 |
| 2                   | 3                   | 4.6442    | 2.9898 | 2.085               | 1.10                    | 0.95                | -31.19                           | -0.15                 |
| 2                   | 4                   | 4.6399    | 2.9881 | 2.109               | 1.01                    | 0.89                | -30.40                           | -0.12                 |
| 2                   | 5                   | 4.6355    | 2.9863 | 2.135               | 0.91                    | 0.83                | -29.54                           | -0.08                 |
| 2                   | 6                   | 4.6309    | 2.9844 | 2.162               | 0.81                    | 0.76                | -28.65                           | -0.05                 |
| 2                   | 7                   | 4.6263    | 2.9825 | 2.191               | 0.71                    | 0.70                | -27.69                           | -0.01                 |
| 2                   | 8                   | 4.6216    | 2.9805 | 2.221               | 0.61                    | 0.63                | -26.70                           | 0.03                  |
| 2                   | 9                   | 4.6166    | 2.9784 | 2.252               | 0.50                    | 0.56                | -25.68                           | 0.06                  |
| 2                   | 10                  | 4.6118    | 2.9761 | 2.284               | 0.39                    | 0.48                | -24.62                           | 0.09                  |
| 3                   | 0                   | 4.6625    | 3.0077 | 2.127               | 1.50                    | 1.55                | -29.80                           | 0.05                  |
| 3                   | 2                   | 4.6541    | 3.0041 | 2.176               | 1.32                    | 1.43                | -28.18                           | 0.11                  |
| 3                   | 3                   | 4.6499    | 3.0023 | 2.201               | 1.22                    | 1.37                | -27.36                           | 0.14                  |
| 3                   | 4                   | 4.6457    | 3.0005 | 2.228               | 1.13                    | 1.31                | -26.47                           | 0.17                  |
| 3                   | 5                   | 4.6413    | 2.9987 | 2.256               | 1.04                    | 1.25                | -25.54                           | 0.21                  |
| 3                   | 6                   | 4.6369    | 2.9968 | 2.286               | 0.94                    | 1.18                | -24.55                           | 0.24                  |
| 3                   | 7                   | 4.6324    | 2.9950 | 2.317               | 0.84                    | 1.12                | -23.53                           | 0.28                  |
| 3                   | 8                   | 4.6278    | 2.9930 | 2.349               | 0.74                    | 1.05                | -22.48                           | 0.31                  |
| 3                   | 9                   | 4.6228    | 2.9909 | 2.383               | 0.63                    | 0.98                | -21.35                           | 0.35                  |
| 3                   | 10                  | 4.6179    | 2.9889 | 2.419               | 0.53                    | 0.91                | -20.17                           | 0.38                  |
| 4                   | 0                   | 4.6687    | 3.0201 | 2.237               | 1.63                    | 1.97                | -26.17                           | 0.33                  |
| 4                   | 2                   | 4.6606    | 3.0166 | 2.291               | 1.46                    | 1.85                | -24.39                           | 0.39                  |
| 4                   | 3                   | 4.6565    | 3.0148 | 2.32                | 1.37                    | 1.79                | -23.43                           | 0.42                  |
| 4                   | 4                   | 4.6523    | 3.0130 | 2.35                | 1.27                    | 1.73                | -22.44                           | 0.45                  |
| 4                   | 5                   | 4.6476    | 3.0109 | 2.382               | 1.17                    | 1.66                | -21.39                           | 0.48                  |
| 4                   | 6                   | 4.6431    | 3.0090 | 2.415               | 1.08                    | 1.59                | -20.30                           | 0.51                  |
| 4                   | 7                   | 4.6385    | 3.0071 | 2.449               | 0.98                    | 1.53                | -19.17                           | 0.55                  |
| 4                   | 8                   | 4.6340    | 3.0051 | 2.484               | 0.88                    | 1.46                | -18.02                           | 0.58                  |
| 4                   | 9                   | 4.6292    | 3.0030 | 2.521               | 0.77                    | 1.39                | -16.80                           | 0.61                  |
| 4                   | 10                  | 4.6242    | 3.0009 | 2.56                | 0.66                    | 1.32                | -15.51                           | 0.65                  |
| 5                   | 0                   | 4.6751    | 3.0321 | 2.351               | 1.77                    | 2.37                | -22.41                           | 0.59                  |
| 5                   | 2                   | 4.6671    | 3.0287 | 2.408               | 1.60                    | 2.26                | -20.53                           | 0.65                  |
| 5                   | 3                   | 4.6630    | 3.0269 | 2.439               | 1.51                    | 2.20                | -19.50                           | 0.68                  |
| 5                   | 4                   | 4.6588    | 3.0251 | 2.47                | 1.42                    | 2.14                | -18.48                           | 0.71                  |
| 5                   | 5                   | 4.6544    | 3.0232 | 2.504               | 1.32                    | 2.07                | -17.36                           | 0.74                  |
| 5                   | 6                   | 4.6499    | 3.0213 | 2.539               | 1.22                    | 2.01                | -16.20                           | 0.77                  |
| 5                   | 7                   | 4.6452    | 3.0192 | 2.576               | 1.12                    | 1.94                | -14.98                           | 0.81                  |

|    |    |        |        |       |      |      |        |      |
|----|----|--------|--------|-------|------|------|--------|------|
| 5  | 8  | 4.6403 | 3.0169 | 2.615 | 1.01 | 1.86 | -13.70 | 0.84 |
| 5  | 9  | 4.6355 | 3.0148 | 2.655 | 0.91 | 1.79 | -12.38 | 0.87 |
| 5  | 10 | 4.6306 | 3.0131 | 2.698 | 0.80 | 1.73 | -10.96 | 0.92 |
| 6  | 0  | 4.6818 | 3.0440 | 2.469 | 1.92 | 2.77 | -18.51 | 0.84 |
| 6  | 2  | 4.6738 | 3.0405 | 2.53  | 1.74 | 2.66 | -16.50 | 0.90 |
| 6  | 3  | 4.6697 | 3.0386 | 2.562 | 1.65 | 2.59 | -15.45 | 0.92 |
| 6  | 4  | 4.6654 | 3.0368 | 2.596 | 1.56 | 2.53 | -14.32 | 0.96 |
| 6  | 5  | 4.6611 | 3.0349 | 2.632 | 1.47 | 2.47 | -13.14 | 0.99 |
| 6  | 6  | 4.6567 | 3.0331 | 2.669 | 1.37 | 2.41 | -11.91 | 1.02 |
| 6  | 7  | 4.6520 | 3.0310 | 2.708 | 1.27 | 2.34 | -10.63 | 1.06 |
| 6  | 8  | 4.6472 | 3.0287 | 2.749 | 1.17 | 2.26 | -9.27  | 1.08 |
| 6  | 9  | 4.6423 | 3.0270 | 2.793 | 1.06 | 2.20 | -7.82  | 1.13 |
| 6  | 10 | 4.6371 | 3.0247 | 2.839 | 0.94 | 2.12 | -6.30  | 1.17 |
| 7  | 0  | 4.6886 | 3.0555 | 2.591 | 2.07 | 3.16 | -14.49 | 1.07 |
| 7  | 2  | 4.6807 | 3.0520 | 2.655 | 1.89 | 3.05 | -12.38 | 1.13 |
| 7  | 3  | 4.6766 | 3.0502 | 2.689 | 1.80 | 2.98 | -11.25 | 1.16 |
| 7  | 4  | 4.6724 | 3.0483 | 2.725 | 1.71 | 2.92 | -10.07 | 1.19 |
| 7  | 5  | 4.6681 | 3.0466 | 2.762 | 1.62 | 2.86 | -8.84  | 1.22 |
| 7  | 6  | 4.6635 | 3.0446 | 2.802 | 1.52 | 2.80 | -7.52  | 1.26 |
| 7  | 7  | 4.6589 | 3.0426 | 2.843 | 1.42 | 2.73 | -6.17  | 1.29 |
| 7  | 8  | 4.6541 | 3.0405 | 2.887 | 1.32 | 2.66 | -4.72  | 1.33 |
| 7  | 9  | 4.6492 | 3.0385 | 2.933 | 1.21 | 2.59 | -3.20  | 1.36 |
| 7  | 10 | 4.6442 | 3.0364 | 2.981 | 1.10 | 2.52 | -1.62  | 1.40 |
| 8  | 0  | 4.6957 | 3.0668 | 2.716 | 2.22 | 3.55 | -10.36 | 1.30 |
| 8  | 2  | 4.6878 | 3.0632 | 2.783 | 2.05 | 3.42 | -8.15  | 1.35 |
| 8  | 3  | 4.6837 | 3.0614 | 2.819 | 1.96 | 3.36 | -6.96  | 1.38 |
| 8  | 4  | 4.6795 | 3.0595 | 2.857 | 1.87 | 3.30 | -5.71  | 1.40 |
| 8  | 5  | 4.6751 | 3.0575 | 2.896 | 1.77 | 3.23 | -4.42  | 1.43 |
| 8  | 6  | 4.6706 | 3.0556 | 2.938 | 1.67 | 3.17 | -3.04  | 1.47 |
| 8  | 7  | 4.6639 | 3.0537 | 2.983 | 1.53 | 3.10 | -1.55  | 1.55 |
| 8  | 8  | 4.6613 | 3.0518 | 3.027 | 1.47 | 3.04 | -0.10  | 1.54 |
| 8  | 9  | 4.6564 | 3.0497 | 3.075 | 1.37 | 2.97 | 1.49   | 1.58 |
| 8  | 10 | 4.6514 | 3.0475 | 3.126 | 1.26 | 2.89 | 3.17   | 1.62 |
| 9  | 0  | 4.7006 | 3.0783 | 2.845 | 2.33 | 3.93 | -6.11  | 1.57 |
| 9  | 2  | 4.6926 | 3.0747 | 2.916 | 2.15 | 3.81 | -3.76  | 1.62 |
| 9  | 3  | 4.6885 | 3.0728 | 2.954 | 2.06 | 3.75 | -2.51  | 1.65 |
| 9  | 4  | 4.6843 | 3.0709 | 2.993 | 1.97 | 3.68 | -1.22  | 1.68 |
| 9  | 5  | 4.6800 | 3.0690 | 3.034 | 1.88 | 3.62 | 0.13   | 1.71 |
| 9  | 6  | 4.6753 | 3.0668 | 3.078 | 1.78 | 3.54 | 1.58   | 1.74 |
| 9  | 7  | 4.6710 | 3.0648 | 3.123 | 1.68 | 3.48 | 3.07   | 1.77 |
| 9  | 8  | 4.6664 | 3.0627 | 3.171 | 1.58 | 3.41 | 4.65   | 1.80 |
| 9  | 9  | 4.6637 | 3.0604 | 3.219 | 1.52 | 3.33 | 6.24   | 1.78 |
| 9  | 10 | 4.6587 | 3.0583 | 3.272 | 1.42 | 3.26 | 7.99   | 1.82 |
| 10 | 0  | 4.7081 | 3.0888 | 2.974 | 2.49 | 4.29 | -1.85  | 1.75 |
| 10 | 2  | 4.6997 | 3.0855 | 3.048 | 2.31 | 4.18 | 0.59   | 1.83 |
| 10 | 3  | 4.6956 | 3.0836 | 3.087 | 2.22 | 4.11 | 1.88   | 1.85 |

|    |    |        |        |       |      |      |       |      |
|----|----|--------|--------|-------|------|------|-------|------|
| 10 | 4  | 4.6914 | 3.0816 | 3.128 | 2.13 | 4.05 | 3.23  | 1.88 |
| 10 | 5  | 4.6870 | 3.0796 | 3.171 | 2.03 | 3.98 | 4.65  | 1.91 |
| 10 | 6  | 4.6826 | 3.0776 | 3.217 | 1.93 | 3.91 | 6.17  | 1.94 |
| 10 | 7  | 4.6780 | 3.0755 | 3.264 | 1.84 | 3.84 | 7.72  | 1.97 |
| 10 | 8  | 4.6735 | 3.0733 | 3.314 | 1.74 | 3.77 | 9.37  | 1.99 |
| 10 | 9  | 4.6692 | 3.0710 | 3.366 | 1.64 | 3.69 | 11.09 | 2.01 |
| 10 | 10 | 4.6638 | 3.0688 | 3.421 | 1.53 | 3.61 | 12.90 | 2.05 |

**Table S6.** Influence of  $U_d$  and  $U_p$  on rutile  $\text{TiO}_2$  DFT+U (PBE) predicted lattice parameters ( $a = b$ ,  $c$ ) and bandgap ( $E_g$ ) [Extrapolation]

| $U_d$ (eV) | $U_p$ (eV) | $a = b$ (Å) | $c$ (Å) | $E_g$ (eV) |
|------------|------------|-------------|---------|------------|
| 1          | 11         | 4.6009      | 2.9619  | 2.189      |
| 2          | 15         | 4.5837      | 2.9665  | 2.482      |
| 4          | 14         | 4.6036      | 2.9915  | 2.737      |
| 7          | 15         | 4.6167      | 3.0250  | 3.277      |
| 9          | 14         | 4.6371      | 3.0490  | 3.529      |
| 10         | 14         | 4.6449      | 3.0595  | 3.685      |
| 11         | 4          | 4.6985      | 3.0920  | 3.283      |
| 12         | 2          | 4.7141      | 3.1060  | 3.333      |
| 13         | 15         | 4.6614      | 3.0860  | 4.227      |
| 15         | 0          | 4.7444      | 3.1407  | 3.645      |

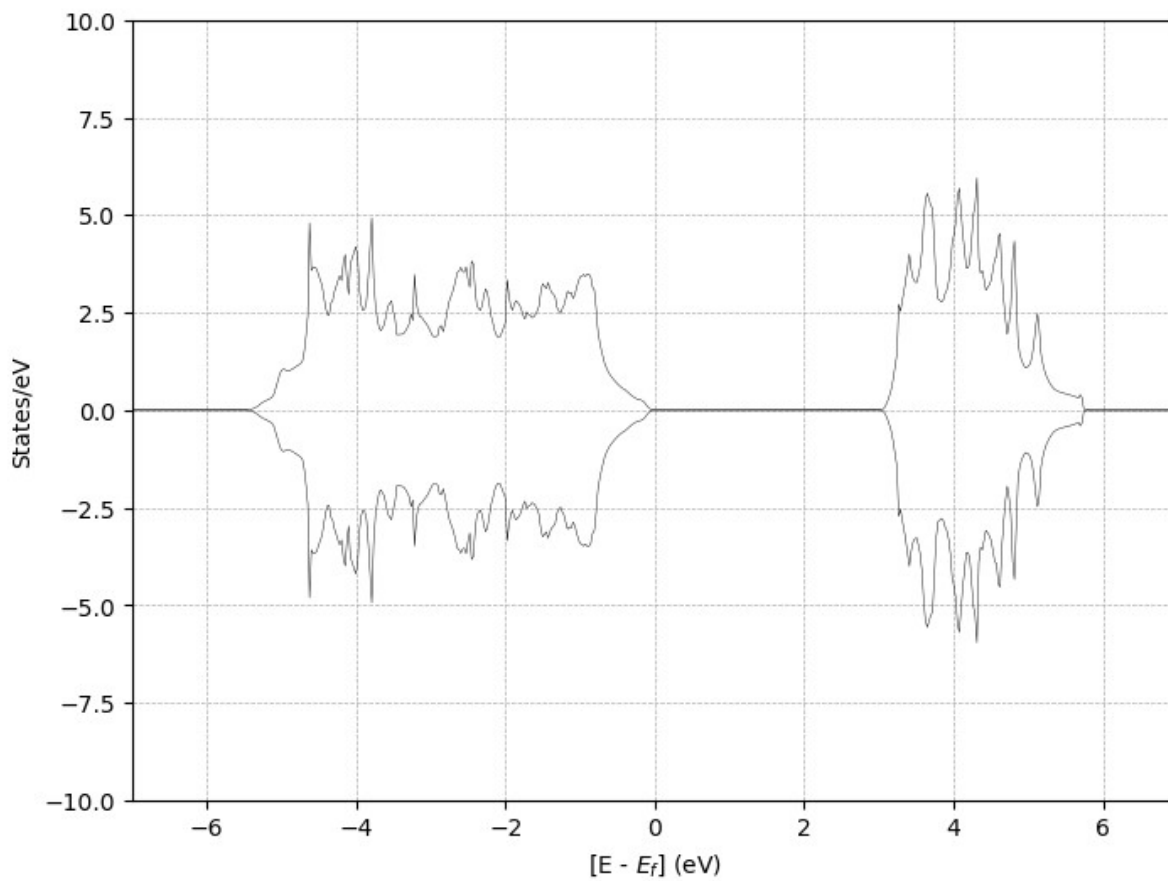

**Figure S16.** DOS for rutile  $\text{TiO}_2$  with PBE functional:  $U_p = 8 \text{ eV}$ ,  $U_d = 8 \text{ eV}$

**Anatase  $\text{TiO}_2$ :**

**rPBE:**

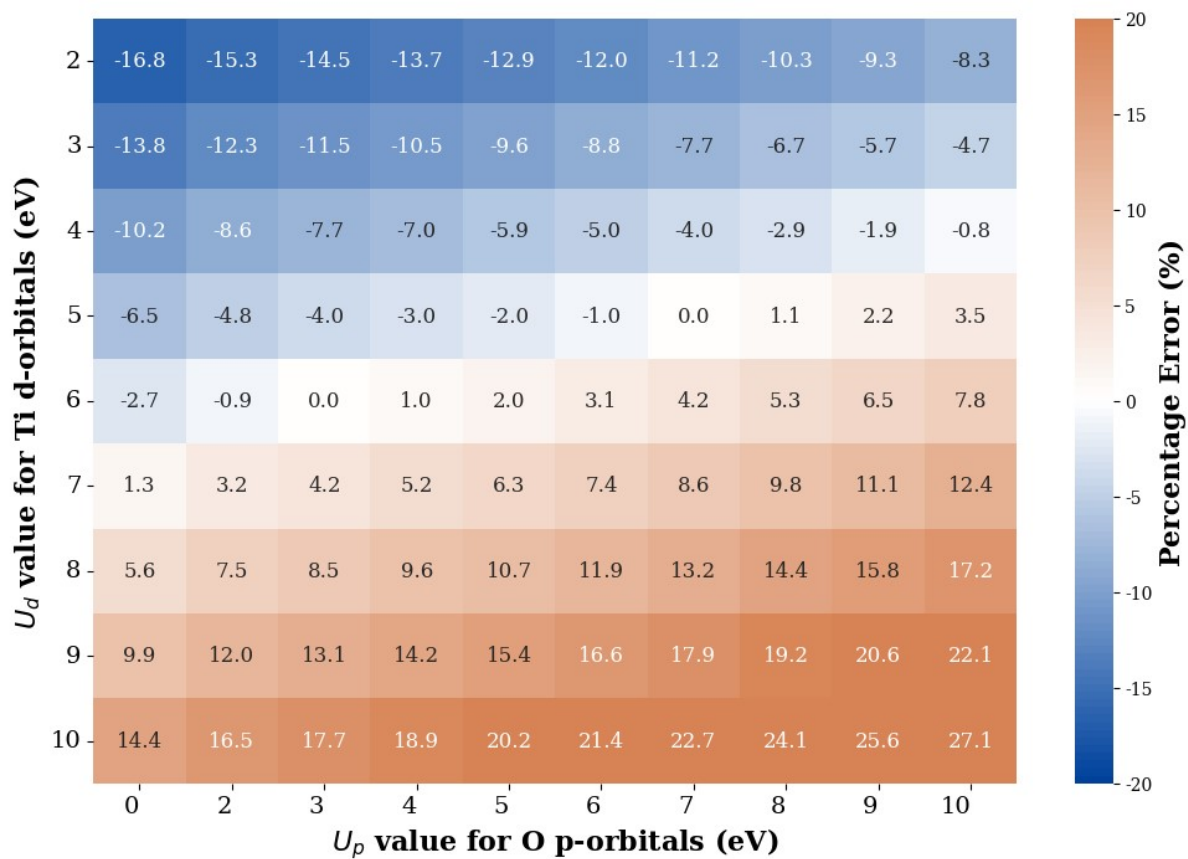

**Figure S17.** Heatmap of rPBE predicted band gap for anatase  $\text{TiO}_2$  as a function of the  $U_d$  and  $U_p$  parameters.

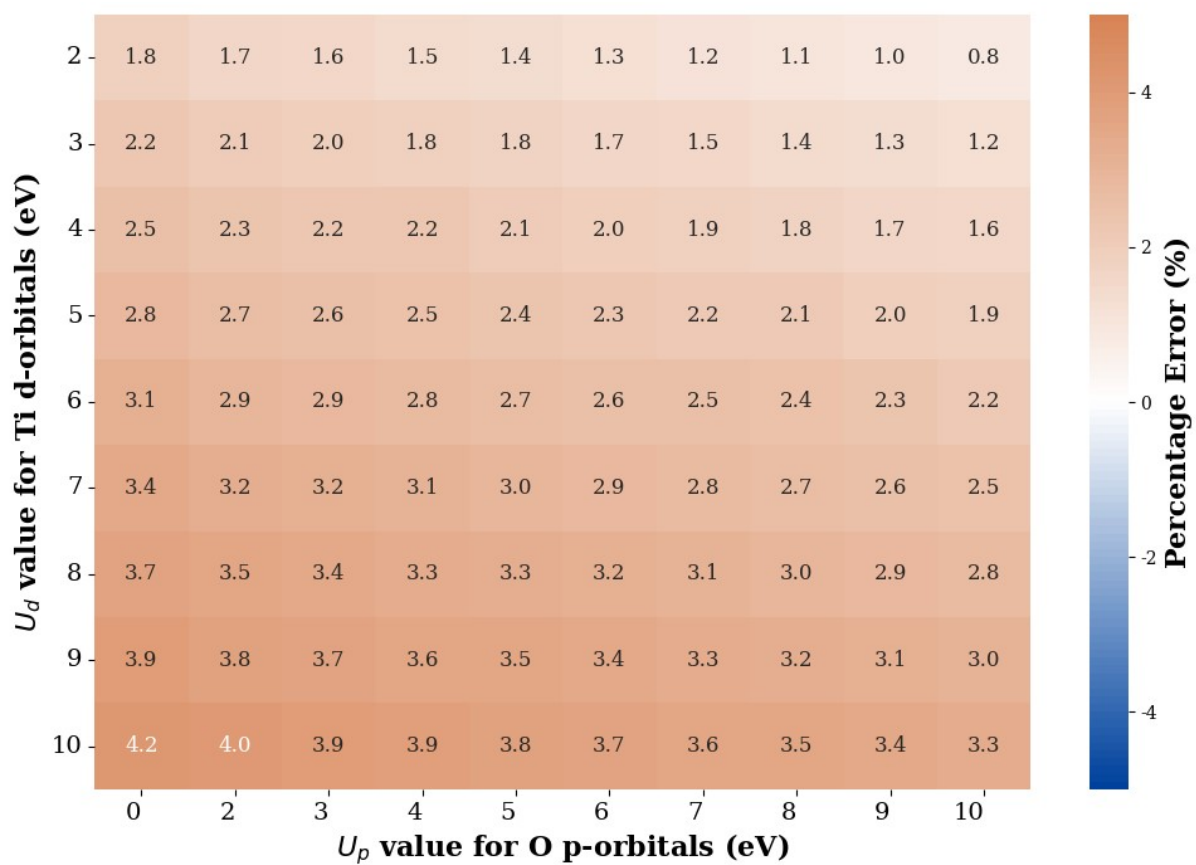

**Figure S18.** Heatmap of rPBE predicted lattice constant ( $a = b$ ) for rutile  $\text{TiO}_2$  as a function of the  $U_d$  and  $U_p$  parameters.

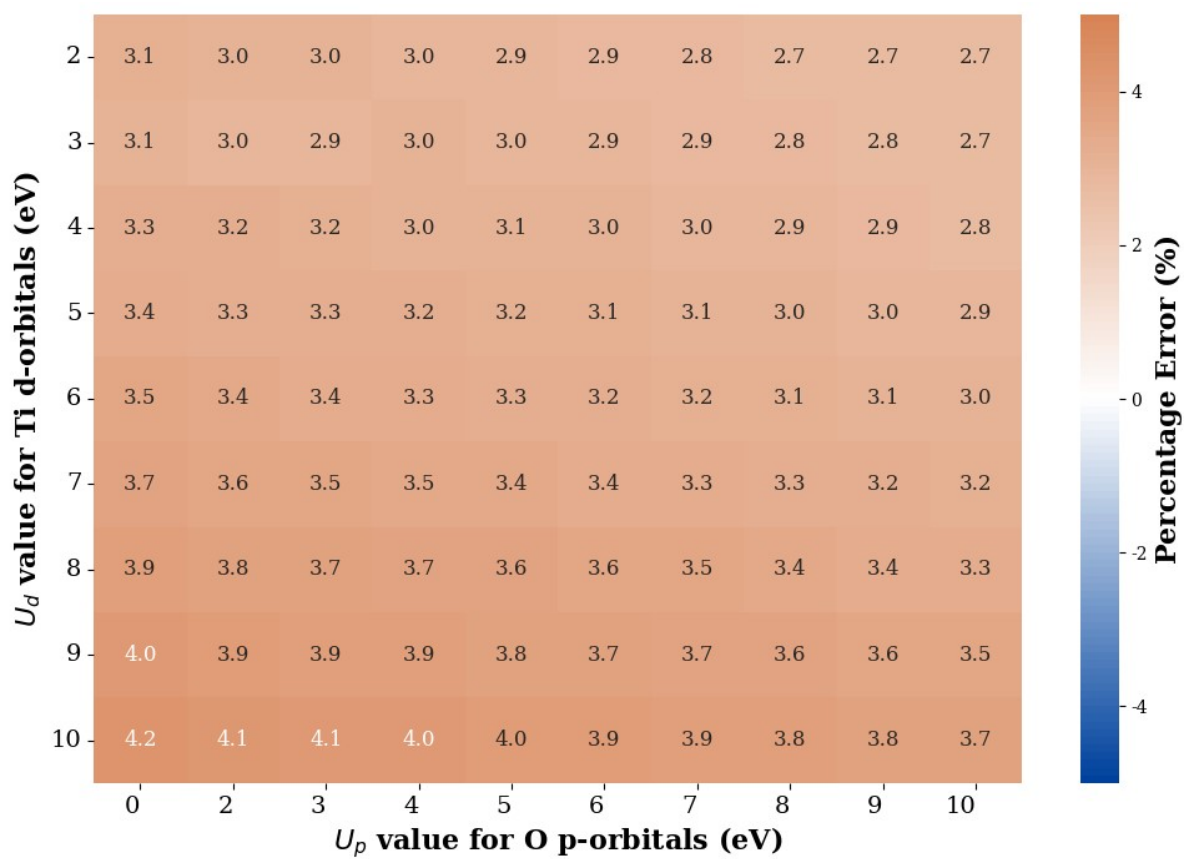

**Figure S19.** Heatmap of rPBE predicted lattice constant ( $c$ ) for anatase  $\text{TiO}_2$  as a function of the  $U_d$  and  $U_p$  parameters.



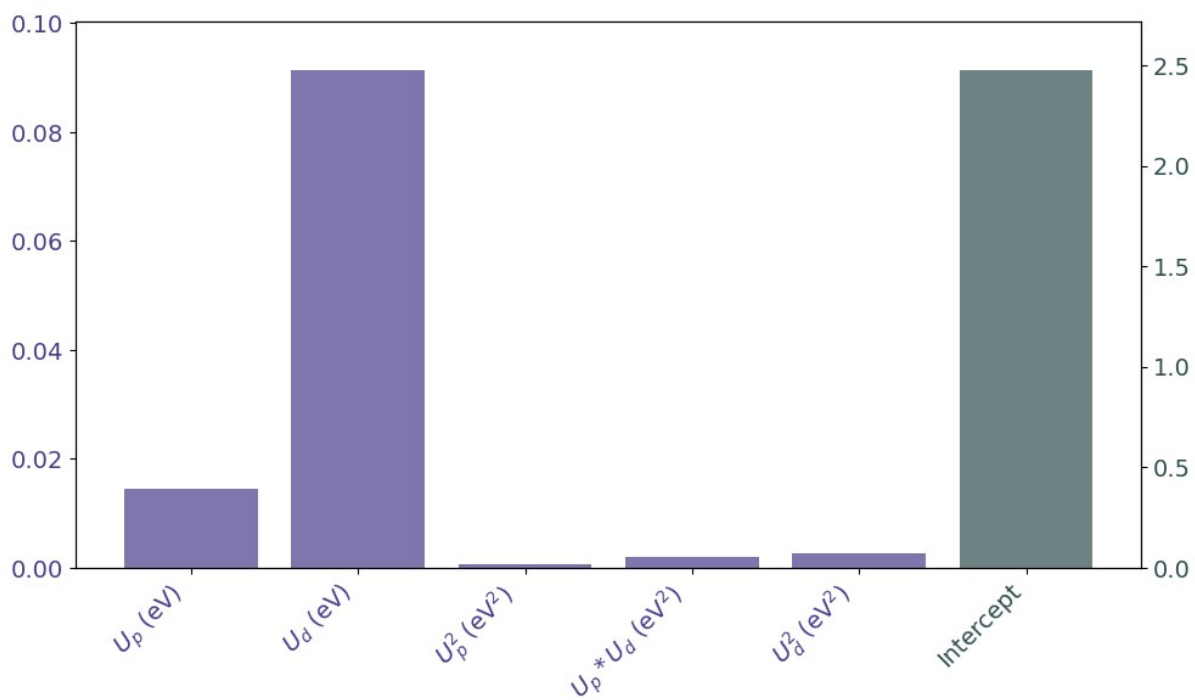

**Figure S20.** Feature importance of the PR model for predicting the rPBE band gap of anatase  $\text{TiO}_2$ .

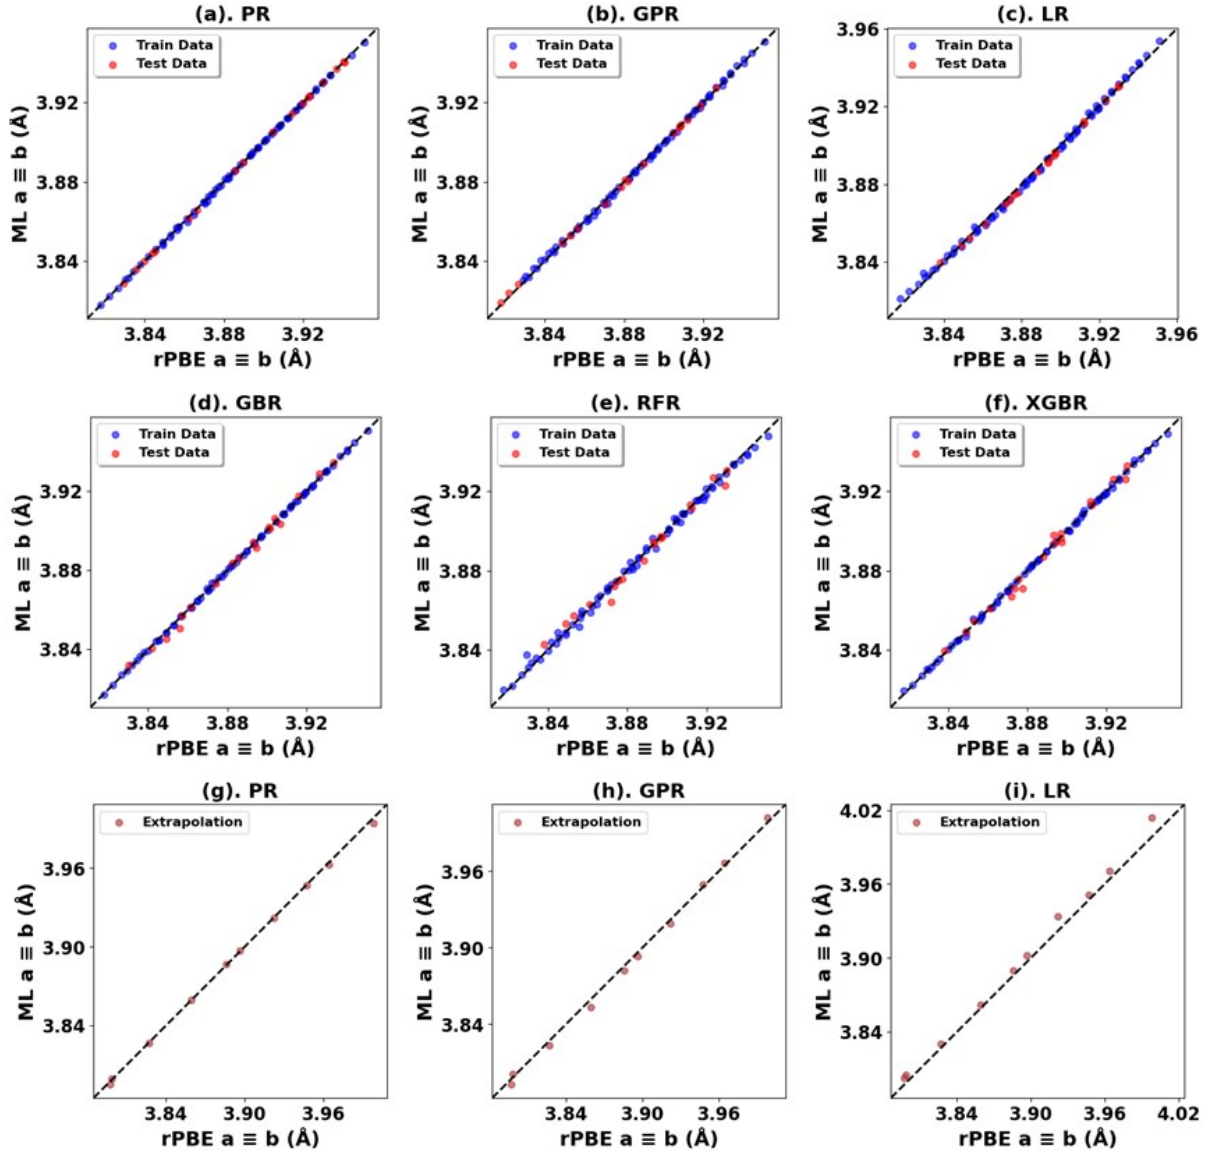

**Figure S21.** (a) - (f) Performance of models for rPBE lattice parameter ( $a = b$ ) prediction of anatase  $\text{TiO}_2$  using the initial range of  $U_p$  from 0.00 eV to 10.00 eV and  $U_d$  from 2.00 eV to 10.00 eV. (g) - (i) Performance of top three models in extrapolation using  $U_p$  and  $U_d$  values beyond these initial ranges.

**Table S7.** Comparative performance of models for rPBE lattice constant ( $a = b$ ) prediction in anatase  $\text{TiO}_2$ .

| Oxide                     | Model | Initial Range             |                          |                         |       | Extrapolation             |                          |                         |       |
|---------------------------|-------|---------------------------|--------------------------|-------------------------|-------|---------------------------|--------------------------|-------------------------|-------|
|                           |       | MSE<br>( $\text{\AA}^2$ ) | RMSE<br>( $\text{\AA}$ ) | MAE<br>( $\text{\AA}$ ) | $R^2$ | MSE<br>( $\text{\AA}^2$ ) | RMSE<br>( $\text{\AA}$ ) | MAE<br>( $\text{\AA}$ ) | $R^2$ |
| Anatase<br>$\text{TiO}_2$ | *PR   | 0.00                      | 0.00                     | 0.00                    | 1.00  | 0.00                      | 0.00                     | 0.00                    | 1.00  |
|                           | GPR   | 0.00                      | 0.00                     | 0.00                    | 1.00  | 0.00                      | 0.00                     | 0.00                    | 1.00  |
|                           | LR    | 0.00                      | 0.00                     | 0.00                    | 1.00  | 0.00                      | 0.01                     | 0.01                    | 0.99  |
|                           | GBR   | 0.00                      | 0.00                     | 0.00                    | 0.99  | 0.00                      | 0.02                     | 0.02                    | 0.89  |
|                           | XGBR  | 0.00                      | 0.00                     | 0.00                    | 0.98  | 0.00                      | 0.02                     | 0.02                    | 0.88  |

|  |     |      |      |      |      |      |      |      |      |
|--|-----|------|------|------|------|------|------|------|------|
|  | RFR | 0.00 | 0.00 | 0.00 | 0.98 | 0.00 | 0.02 | 0.02 | 0.87 |
|--|-----|------|------|------|------|------|------|------|------|

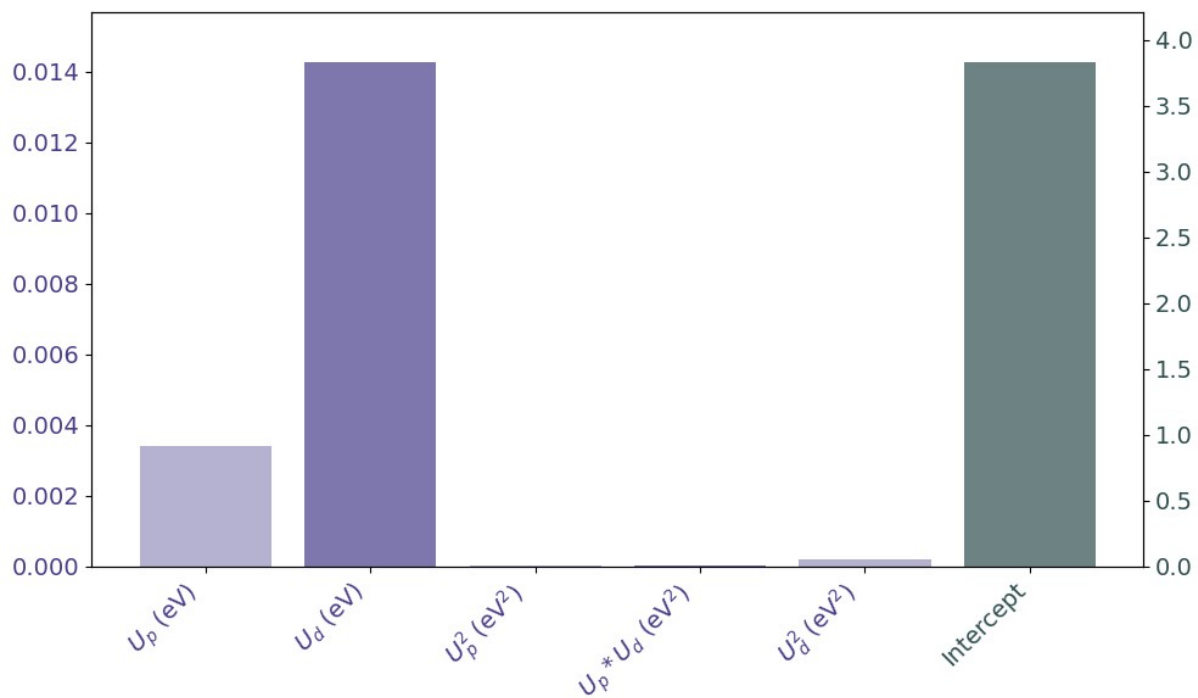

**Figure S22.** Feature importance of the PR model for predicting the rPBE lattice constant (a = b) of anatase TiO<sub>2</sub>. Lighter shades indicate features with negative contributions.

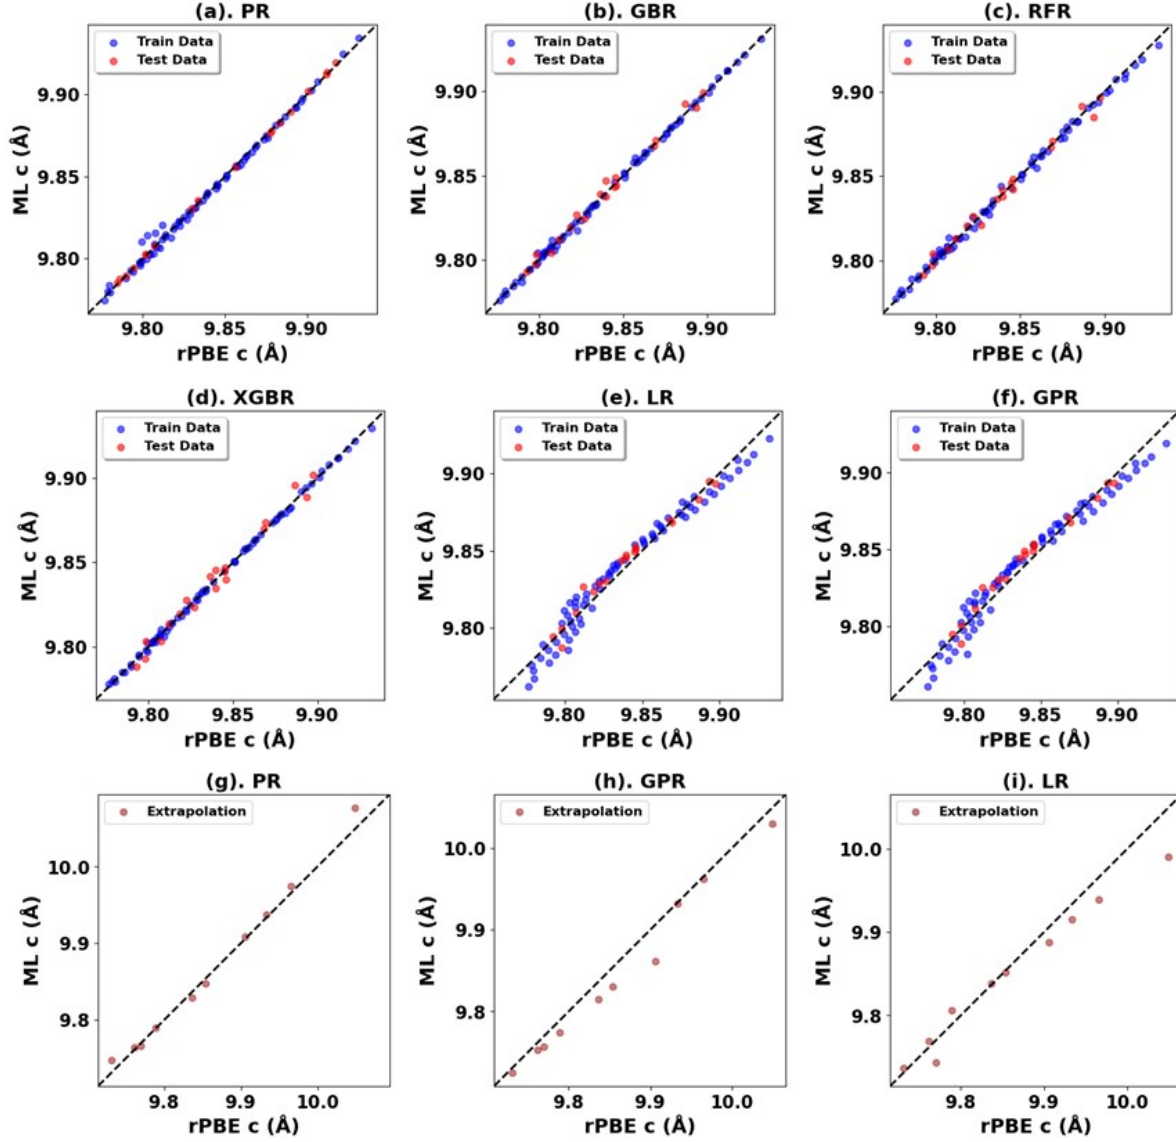

**Figure S23.** (a) - (f) Performance of models for rPBE lattice parameter (c) prediction of anatase  $\text{TiO}_2$  using the initial range of  $U_p$  from 0.00 eV to 10.00 eV and  $U_d$  from 2.00 eV to 10.00 eV. (g) - (i) Performance of top three models in extrapolation using  $U_p$  and  $U_d$  values beyond these initial ranges.

**Table S8.** Comparative performance of models for rPBE lattice constant (c) prediction in anatase  $\text{TiO}_2$ .

| Oxide                     | Model | Initial Range             |                          |                         |       | Extrapolation             |                          |                         |       |
|---------------------------|-------|---------------------------|--------------------------|-------------------------|-------|---------------------------|--------------------------|-------------------------|-------|
|                           |       | MSE<br>( $\text{\AA}^2$ ) | RMSE<br>( $\text{\AA}$ ) | MAE<br>( $\text{\AA}$ ) | $R^2$ | MSE<br>( $\text{\AA}^2$ ) | RMSE<br>( $\text{\AA}$ ) | MAE<br>( $\text{\AA}$ ) | $R^2$ |
| Anatase<br>$\text{TiO}_2$ | *PR   | 0.00                      | 0.00                     | 0.00                    | 0.99  | 0.00                      | 0.01                     | 0.01                    | 0.99  |
|                           | GPR   | 0.00                      | 0.01                     | 0.01                    | 0.95  | 0.00                      | 0.02                     | 0.02                    | 0.96  |
|                           | LR    | 0.00                      | 0.01                     | 0.01                    | 0.96  | 0.00                      | 0.02                     | 0.02                    | 0.94  |
|                           | GBR   | 0.00                      | 0.00                     | 0.00                    | 0.99  | 0.00                      | 0.05                     | 0.04                    | 0.77  |
|                           | XGBR  | 0.00                      | 0.01                     | 0.00                    | 0.98  | 0.00                      | 0.05                     | 0.04                    | 0.76  |

|  |     |      |      |      |      |      |      |      |      |
|--|-----|------|------|------|------|------|------|------|------|
|  | RFR | 0.00 | 0.01 | 0.00 | 0.98 | 0.00 | 0.05 | 0.04 | 0.75 |
|--|-----|------|------|------|------|------|------|------|------|

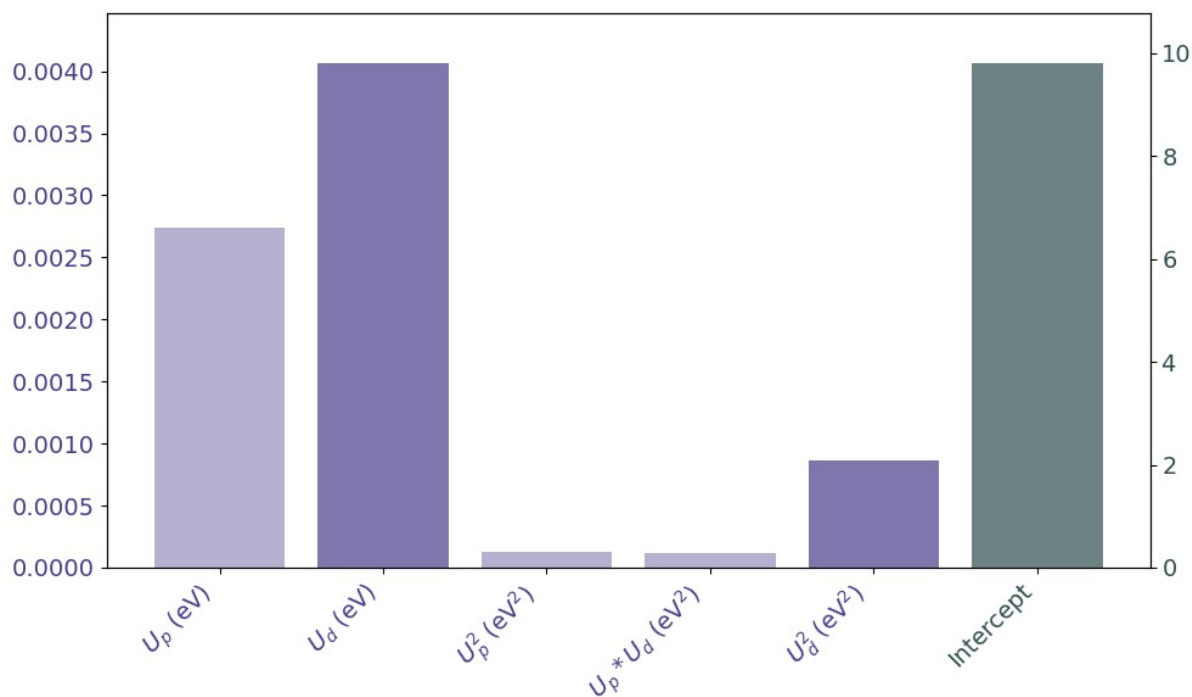

**Figure S24.** Feature importance of the PR model for predicting the rPBE lattice constant ( $c$ ) of anatase  $\text{TiO}_2$ . Lighter shades indicate features with negative contributions.

**Table S9.** Influence of  $U_d$  and  $U_p$  on anatase  $\text{TiO}_2$  DFT+U (rPBE) predicted lattice parameters ( $a = b$ ,  $c$ ) and bandgap ( $E_g$ )

| $U_d$ (eV) | $U_p$ (eV) | $a = b$ (Å) | $c$ (Å) | $E_g$ (eV) | % Deviation in $a = b$ | % Deviation in $c$ | % Deviation in $E_g$ | % Deviation in $c/a$ |
|------------|------------|-------------|---------|------------|------------------------|--------------------|----------------------|----------------------|
| 0          | 0          | 3.8292      | 9.8019  | 2.486      | 1.16                   | 3.05               | -22.31               | 1.86                 |
| 2          | 0          | 3.8558      | 9.8173  | 2.664      | 1.87                   | 3.21               | -16.75               | 1.32                 |
| 2          | 2          | 3.8489      | 9.8104  | 2.711      | 1.69                   | 3.14               | -15.28               | 1.43                 |
| 2          | 3          | 3.8454      | 9.8065  | 2.735      | 1.59                   | 3.10               | -14.53               | 1.48                 |
| 2          | 4          | 3.8417      | 9.8024  | 2.761      | 1.50                   | 3.06               | -13.72               | 1.54                 |
| 2          | 5          | 3.8380      | 9.7983  | 2.787      | 1.40                   | 3.01               | -12.91               | 1.59                 |
| 2          | 6          | 3.8341      | 9.7940  | 2.815      | 1.29                   | 2.97               | -12.03               | 1.65                 |
| 2          | 7          | 3.8302      | 9.7897  | 2.843      | 1.19                   | 2.92               | -11.16               | 1.71                 |
| 2          | 8          | 3.8267      | 9.7797  | 2.871      | 1.10                   | 2.82               | -10.28               | 1.70                 |
| 2          | 9          | 3.8220      | 9.7802  | 2.904      | 0.97                   | 2.82               | -9.25                | 1.83                 |
| 2          | 10         | 3.8176      | 9.7764  | 2.936      | 0.86                   | 2.78               | -8.25                | 1.91                 |
| 3          | 0          | 3.8718      | 9.8118  | 2.757      | 2.29                   | 3.15               | -13.84               | 0.84                 |
| 3          | 2          | 3.8648      | 9.8029  | 2.806      | 2.11                   | 3.06               | -12.31               | 0.94                 |
| 3          | 3          | 3.8614      | 9.7994  | 2.832      | 2.02                   | 3.02               | -11.50               | 0.99                 |
| 3          | 4          | 3.8563      | 9.8091  | 2.864      | 1.88                   | 3.13               | -10.50               | 1.22                 |
| 3          | 5          | 3.8526      | 9.8048  | 2.892      | 1.78                   | 3.08               | -9.63                | 1.27                 |

|   |    |        |        |       |      |      |        |      |
|---|----|--------|--------|-------|------|------|--------|------|
| 3 | 6  | 3.8489 | 9.7994 | 2.920 | 1.69 | 3.02 | -8.75  | 1.32 |
| 3 | 7  | 3.8440 | 9.7944 | 2.954 | 1.56 | 2.97 | -7.69  | 1.39 |
| 3 | 8  | 3.8400 | 9.7895 | 2.985 | 1.45 | 2.92 | -6.72  | 1.45 |
| 3 | 9  | 3.8359 | 9.7843 | 3.017 | 1.34 | 2.86 | -5.72  | 1.50 |
| 3 | 10 | 3.8317 | 9.7784 | 3.051 | 1.23 | 2.80 | -4.66  | 1.55 |
| 4 | 0  | 3.8826 | 9.8314 | 2.874 | 2.57 | 3.36 | -10.19 | 0.77 |
| 4 | 2  | 3.8756 | 9.8268 | 2.926 | 2.39 | 3.31 | -8.56  | 0.90 |
| 4 | 3  | 3.8721 | 9.8225 | 2.953 | 2.30 | 3.27 | -7.72  | 0.95 |
| 4 | 4  | 3.8703 | 9.8075 | 2.975 | 2.25 | 3.11 | -7.03  | 0.84 |
| 4 | 5  | 3.8648 | 9.8120 | 3.010 | 2.11 | 3.16 | -5.94  | 1.03 |
| 4 | 6  | 3.8610 | 9.8074 | 3.041 | 2.01 | 3.11 | -4.97  | 1.08 |
| 4 | 7  | 3.8571 | 9.8038 | 3.073 | 1.90 | 3.07 | -3.97  | 1.15 |
| 4 | 8  | 3.8531 | 9.7978 | 3.106 | 1.80 | 3.01 | -2.94  | 1.19 |
| 4 | 9  | 3.8490 | 9.7925 | 3.140 | 1.69 | 2.95 | -1.88  | 1.24 |
| 4 | 10 | 3.8449 | 9.7858 | 3.176 | 1.58 | 2.88 | -0.75  | 1.28 |
| 5 | 0  | 3.8945 | 9.8449 | 2.992 | 2.89 | 3.50 | -6.50  | 0.59 |
| 5 | 2  | 3.8882 | 9.8364 | 3.045 | 2.72 | 3.41 | -4.84  | 0.67 |
| 5 | 3  | 3.8847 | 9.8321 | 3.073 | 2.63 | 3.37 | -3.97  | 0.72 |
| 5 | 4  | 3.8805 | 9.8286 | 3.105 | 2.52 | 3.33 | -2.97  | 0.79 |
| 5 | 5  | 3.8774 | 9.8222 | 3.135 | 2.44 | 3.26 | -2.03  | 0.81 |
| 5 | 6  | 3.8736 | 9.8186 | 3.167 | 2.34 | 3.22 | -1.03  | 0.87 |
| 5 | 7  | 3.8698 | 9.8134 | 3.201 | 2.24 | 3.17 | 0.03   | 0.91 |
| 5 | 8  | 3.8664 | 9.8068 | 3.234 | 2.15 | 3.10 | 1.06   | 0.94 |
| 5 | 9  | 3.8622 | 9.8018 | 3.271 | 2.04 | 3.05 | 2.22   | 0.99 |
| 5 | 10 | 3.8569 | 9.7983 | 3.312 | 1.90 | 3.01 | 3.50   | 1.09 |
| 6 | 0  | 3.9069 | 9.8595 | 3.114 | 3.22 | 3.65 | -2.69  | 0.42 |
| 6 | 2  | 3.9002 | 9.8504 | 3.171 | 3.04 | 3.56 | -0.91  | 0.50 |
| 6 | 3  | 3.8968 | 9.8457 | 3.201 | 2.95 | 3.51 | 0.03   | 0.54 |
| 6 | 4  | 3.8933 | 9.8394 | 3.231 | 2.86 | 3.44 | 0.97   | 0.57 |
| 6 | 5  | 3.8897 | 9.8337 | 3.263 | 2.76 | 3.38 | 1.97   | 0.60 |
| 6 | 6  | 3.8858 | 9.8295 | 3.299 | 2.66 | 3.34 | 3.09   | 0.66 |
| 6 | 7  | 3.8824 | 9.8248 | 3.333 | 2.57 | 3.29 | 4.16   | 0.70 |
| 6 | 8  | 3.8785 | 9.8194 | 3.370 | 2.47 | 3.23 | 5.31   | 0.75 |
| 6 | 9  | 3.8743 | 9.8140 | 3.409 | 2.36 | 3.18 | 6.53   | 0.80 |
| 6 | 10 | 3.8699 | 9.8069 | 3.450 | 2.24 | 3.10 | 7.81   | 0.84 |
| 7 | 0  | 3.9184 | 9.8759 | 3.243 | 3.52 | 3.83 | 1.34   | 0.30 |
| 7 | 2  | 3.9117 | 9.8664 | 3.303 | 3.34 | 3.73 | 3.22   | 0.37 |
| 7 | 3  | 3.9083 | 9.8615 | 3.335 | 3.25 | 3.68 | 4.22   | 0.41 |
| 7 | 4  | 3.9048 | 9.8562 | 3.367 | 3.16 | 3.62 | 5.22   | 0.44 |
| 7 | 5  | 3.9014 | 9.8508 | 3.401 | 3.07 | 3.56 | 6.28   | 0.48 |
| 7 | 6  | 3.8975 | 9.8454 | 3.437 | 2.97 | 3.51 | 7.41   | 0.52 |
| 7 | 7  | 3.8937 | 9.8396 | 3.474 | 2.87 | 3.45 | 8.56   | 0.56 |
| 7 | 8  | 3.8898 | 9.8340 | 3.513 | 2.76 | 3.39 | 9.78   | 0.60 |
| 7 | 9  | 3.8857 | 9.8280 | 3.554 | 2.66 | 3.32 | 11.06  | 0.65 |
| 7 | 10 | 3.8816 | 9.8219 | 3.597 | 2.55 | 3.26 | 12.41  | 0.69 |
| 8 | 0  | 3.9295 | 9.8933 | 3.378 | 3.82 | 4.01 | 5.56   | 0.19 |

|    |    |        |        |       |      |      |       |      |
|----|----|--------|--------|-------|------|------|-------|------|
| 8  | 2  | 3.9232 | 9.8835 | 3.440 | 3.65 | 3.91 | 7.50  | 0.25 |
| 8  | 3  | 3.9197 | 9.8786 | 3.473 | 3.56 | 3.86 | 8.53  | 0.29 |
| 8  | 4  | 3.9162 | 9.8736 | 3.508 | 3.46 | 3.80 | 9.62  | 0.33 |
| 8  | 5  | 3.9125 | 9.8682 | 3.544 | 3.37 | 3.75 | 10.75 | 0.37 |
| 8  | 6  | 3.9087 | 9.8627 | 3.581 | 3.26 | 3.69 | 11.91 | 0.41 |
| 8  | 7  | 3.9049 | 9.8569 | 3.621 | 3.16 | 3.63 | 13.16 | 0.45 |
| 8  | 8  | 3.9010 | 9.8511 | 3.662 | 3.06 | 3.57 | 14.44 | 0.49 |
| 8  | 9  | 3.8970 | 9.8449 | 3.705 | 2.96 | 3.50 | 15.78 | 0.53 |
| 8  | 10 | 3.8929 | 9.8384 | 3.750 | 2.85 | 3.43 | 17.19 | 0.57 |
| 9  | 0  | 3.9407 | 9.9117 | 3.516 | 4.11 | 4.20 | 9.87  | 0.09 |
| 9  | 2  | 3.9338 | 9.9026 | 3.583 | 3.93 | 4.11 | 11.97 | 0.17 |
| 9  | 3  | 3.9304 | 9.8974 | 3.618 | 3.84 | 4.05 | 13.06 | 0.21 |
| 9  | 4  | 3.9264 | 9.8930 | 3.656 | 3.73 | 4.01 | 14.25 | 0.27 |
| 9  | 5  | 3.9234 | 9.8865 | 3.692 | 3.65 | 3.94 | 15.38 | 0.28 |
| 9  | 6  | 3.9197 | 9.8810 | 3.731 | 3.55 | 3.88 | 16.59 | 0.32 |
| 9  | 7  | 3.9157 | 9.8754 | 3.772 | 3.45 | 3.82 | 17.88 | 0.36 |
| 9  | 8  | 3.9119 | 9.8693 | 3.815 | 3.35 | 3.76 | 19.22 | 0.40 |
| 9  | 9  | 3.9079 | 9.8634 | 3.860 | 3.24 | 3.70 | 20.63 | 0.44 |
| 9  | 10 | 3.9037 | 9.8580 | 3.908 | 3.13 | 3.64 | 22.13 | 0.49 |
| 10 | 0  | 3.9510 | 9.9319 | 3.661 | 4.38 | 4.42 | 14.41 | 0.03 |
| 10 | 2  | 3.9444 | 9.9221 | 3.729 | 4.21 | 4.31 | 16.53 | 0.10 |
| 10 | 3  | 3.9405 | 9.9177 | 3.768 | 4.10 | 4.27 | 17.75 | 0.16 |
| 10 | 4  | 3.9370 | 9.9123 | 3.805 | 4.01 | 4.21 | 18.91 | 0.19 |
| 10 | 5  | 3.9335 | 9.9066 | 3.845 | 3.92 | 4.15 | 20.16 | 0.22 |
| 10 | 6  | 3.9298 | 9.9009 | 3.885 | 3.82 | 4.09 | 21.41 | 0.26 |
| 10 | 7  | 3.9264 | 9.8962 | 3.927 | 3.73 | 4.04 | 22.72 | 0.30 |
| 10 | 8  | 3.9225 | 9.8903 | 3.972 | 3.63 | 3.98 | 24.13 | 0.34 |
| 10 | 9  | 3.9185 | 9.8840 | 4.019 | 3.52 | 3.91 | 25.59 | 0.38 |
| 10 | 10 | 3.9145 | 9.8776 | 4.068 | 3.42 | 3.85 | 27.13 | 0.41 |

**Table S10.** Influence of  $U_d$  and  $U_p$  on anatase  $\text{TiO}_2$  DFT+U (rPBE) predicted lattice parameters ( $a = b, c$ ) and bandgap ( $E_g$ ) [Extrapolation]

| $U_d$ (eV) | $U_p$ (eV) | $a = b$ (Å) | $c$ (Å) | $E_g$ (eV) |
|------------|------------|-------------|---------|------------|
| 1          | 11         | 3.7984      | 9.7697  | 2.860      |
| 2          | 15         | 3.7972      | 9.7312  | 3.108      |
| 4          | 14         | 3.8269      | 9.7614  | 3.338      |



|    |    |        |         |       |
|----|----|--------|---------|-------|
| 7  | 15 | 3.8594 | 9.7891  | 3.845 |
| 9  | 14 | 3.8859 | 9.8363  | 4.121 |
| 10 | 14 | 3.8965 | 9.8537  | 4.290 |
| 11 | 4  | 3.9473 | 9.9329  | 3.958 |
| 12 | 2  | 3.9642 | 9.9652  | 4.032 |
| 13 | 15 | 3.9221 | 9.9055  | 4.870 |
| 15 | 0  | 3.9985 | 10.0493 | 4.397 |

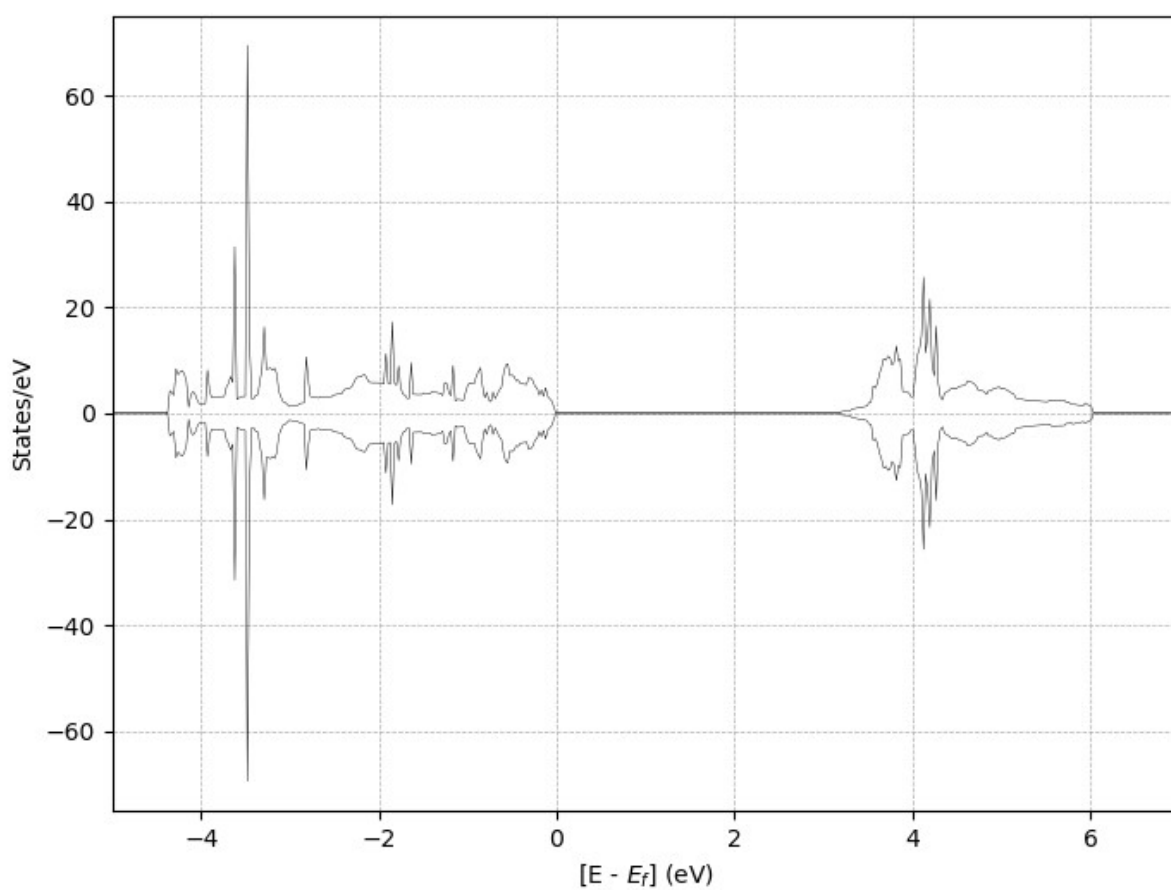

**Figure S25.** DOS for anatase  $\text{TiO}_2$  with rPBE functional:  $U_p = 3$  eV,  $U_d = 6$  eV

PBE:

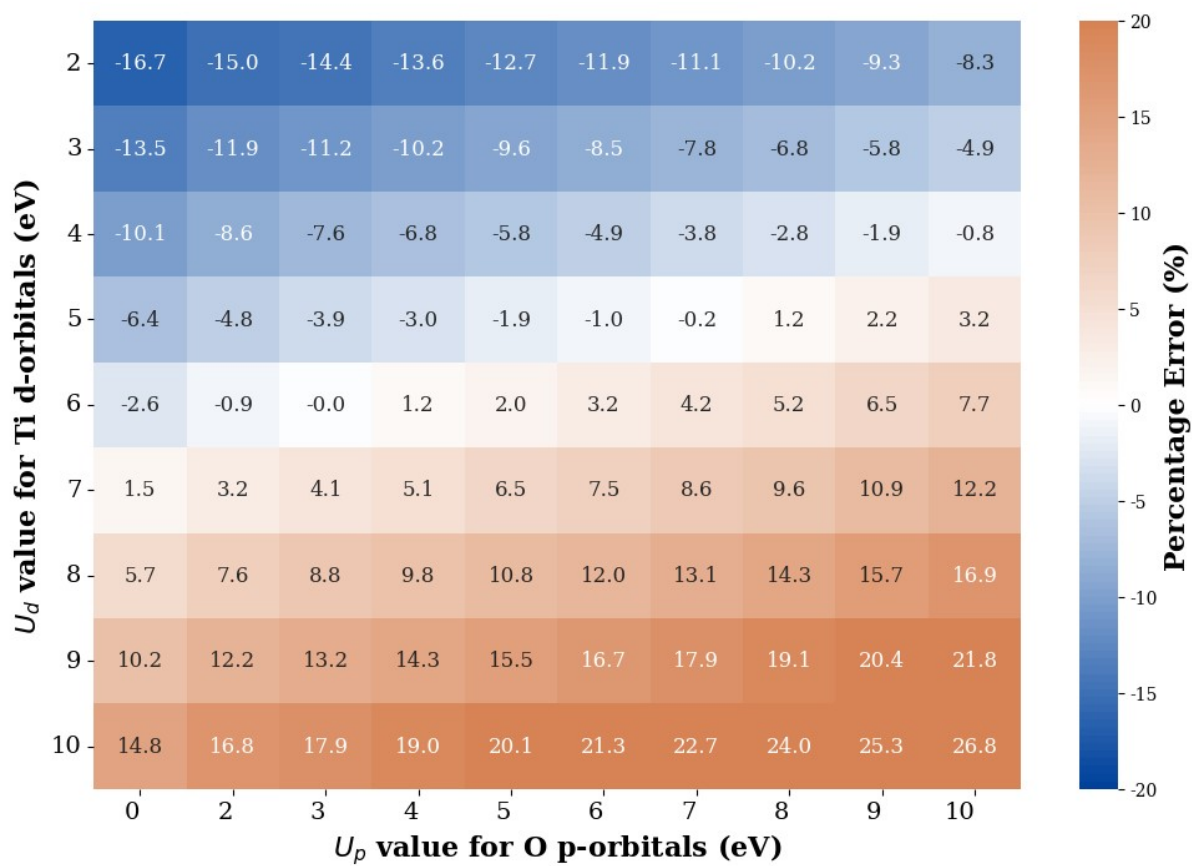

**Figure S26.** Heatmap of PBE predicted band gap for anatase TiO<sub>2</sub> as a function of the  $U_d$  and  $U_p$  parameters.

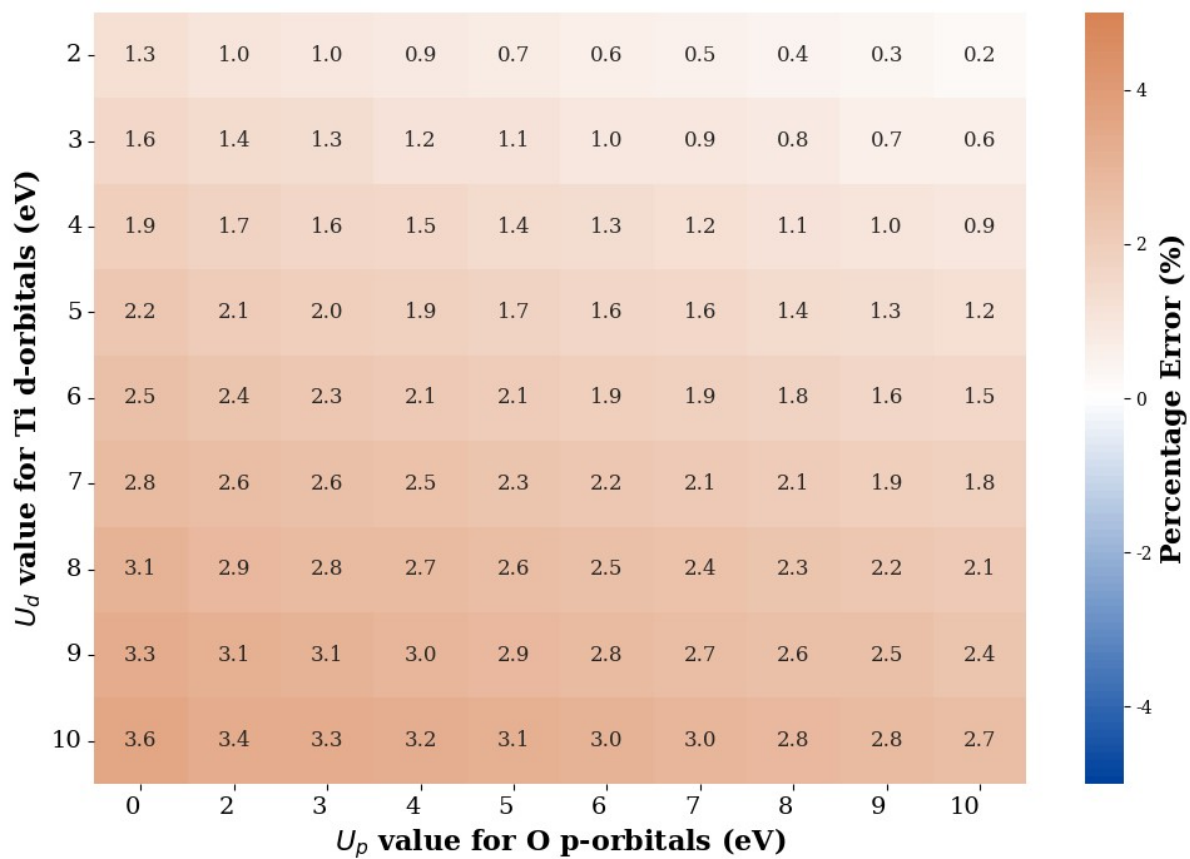

**Figure S27.** Heatmap of PBE predicted lattice constant ( $a = b$ ) for anatase  $\text{TiO}_2$  as a function of the  $U_d$  and  $U_p$  parameters.

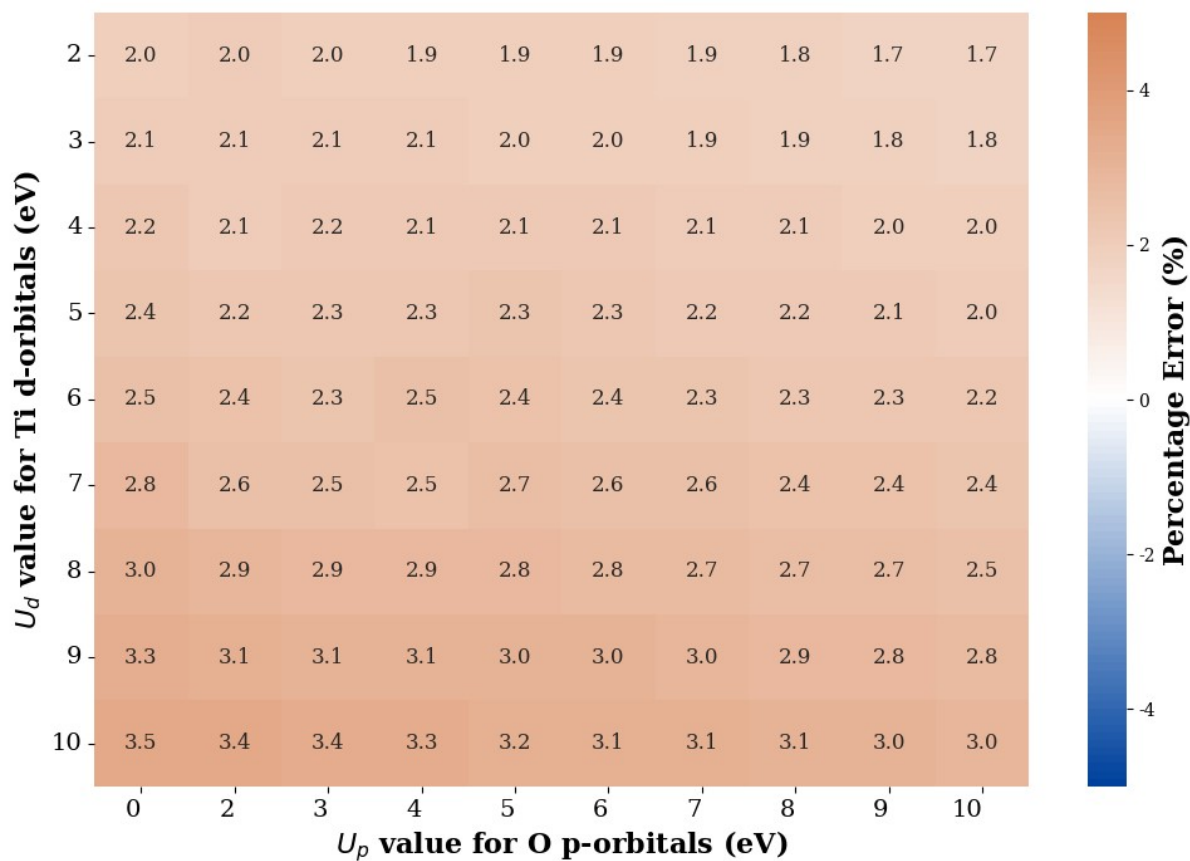

**Figure S28.** Heatmap of PBE predicted lattice constant ( $c$ ) for anatase  $\text{TiO}_2$  as a function of the  $U_d$  and  $U_p$  parameters.

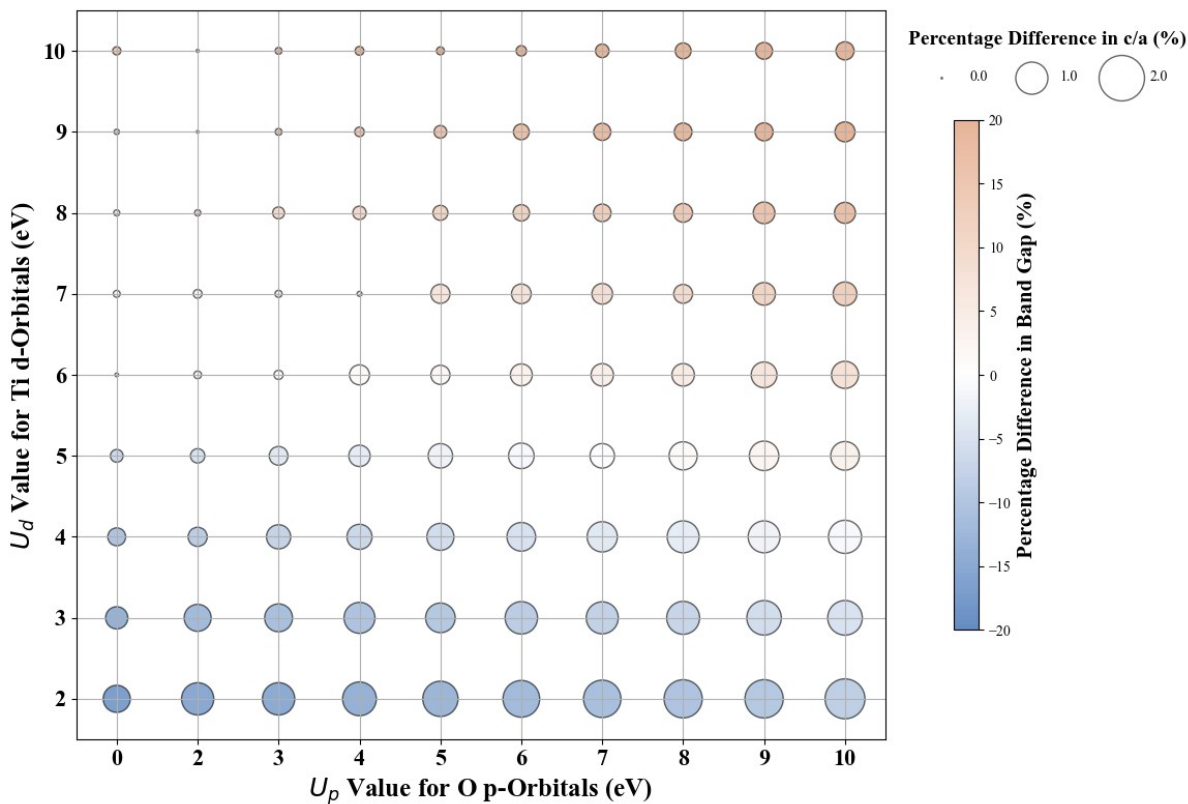

**Figure S29.** Effect of Hubbard U values on PBE band gap and lattice parameters of anatase TiO<sub>2</sub>.

**Table S11.** Influence of U<sub>d</sub> and U<sub>p</sub> on anatase TiO<sub>2</sub> DFT+U (PBE) predicted lattice parameters (a = b, c) and bandgap (E<sub>g</sub>)

| U <sub>d</sub> (eV) | U <sub>p</sub> (eV) | a = b (Å) | c (Å)  | E <sub>g</sub> (eV) | %<br>Deviation<br>in a = b | %<br>Deviation<br>in c | %<br>Deviation<br>in E <sub>g</sub> | %<br>Deviation<br>in c/a |
|---------------------|---------------------|-----------|--------|---------------------|----------------------------|------------------------|-------------------------------------|--------------------------|
| 0                   | 0                   | 3.8044    | 9.7024 | 2.496               | 0.51                       | 1.96                   | -22.00                              | 1.49                     |
| 2                   | 0                   | 3.8334    | 9.7019 | 2.666               | 1.26                       | 1.96                   | -16.69                              | 0.71                     |
| 2                   | 2                   | 3.8246    | 9.7082 | 2.719               | 1.03                       | 2.02                   | -15.03                              | 1.01                     |
| 2                   | 3                   | 3.8223    | 9.7031 | 2.738               | 0.97                       | 1.97                   | -14.44                              | 1.02                     |
| 2                   | 4                   | 3.8180    | 9.7010 | 2.765               | 0.86                       | 1.95                   | -13.59                              | 1.11                     |
| 2                   | 5                   | 3.8132    | 9.6983 | 2.793               | 0.74                       | 1.92                   | -12.72                              | 1.21                     |
| 2                   | 6                   | 3.8097    | 9.6989 | 2.819               | 0.64                       | 1.93                   | -11.91                              | 1.31                     |
| 2                   | 7                   | 3.8059    | 9.6939 | 2.845               | 0.55                       | 1.88                   | -11.09                              | 1.36                     |
| 2                   | 8                   | 3.8015    | 9.6882 | 2.875               | 0.43                       | 1.82                   | -10.16                              | 1.41                     |
| 2                   | 9                   | 3.7982    | 9.6807 | 2.901               | 0.34                       | 1.74                   | -9.34                               | 1.42                     |
| 2                   | 10                  | 3.7933    | 9.6796 | 2.933               | 0.21                       | 1.73                   | -8.34                               | 1.55                     |
| 3                   | 0                   | 3.8464    | 9.7122 | 2.768               | 1.59                       | 2.06                   | -13.50                              | 0.48                     |
| 3                   | 2                   | 3.8391    | 9.7158 | 2.818               | 1.41                       | 2.10                   | -11.94                              | 0.71                     |
| 3                   | 3                   | 3.8357    | 9.7117 | 2.842               | 1.32                       | 2.06                   | -11.19                              | 0.76                     |
| 3                   | 4                   | 3.8306    | 9.7157 | 2.874               | 1.19                       | 2.10                   | -10.19                              | 0.93                     |
| 3                   | 5                   | 3.8286    | 9.7031 | 2.894               | 1.14                       | 1.97                   | -9.56                               | 0.85                     |
| 3                   | 6                   | 3.8232    | 9.7056 | 2.927               | 1.00                       | 2.00                   | -8.53                               | 1.02                     |
| 3                   | 7                   | 3.8204    | 9.6961 | 2.952               | 0.92                       | 1.90                   | -7.75                               | 1.00                     |
| 3                   | 8                   | 3.8165    | 9.6917 | 2.982               | 0.82                       | 1.86                   | -6.81                               | 1.05                     |
| 3                   | 9                   | 3.8116    | 9.6890 | 3.015               | 0.69                       | 1.83                   | -5.78                               | 1.16                     |
| 3                   | 10                  | 3.8085    | 9.6817 | 3.043               | 0.61                       | 1.75                   | -4.91                               | 1.16                     |
| 4                   | 0                   | 3.8585    | 9.7266 | 2.878               | 1.90                       | 2.21                   | -10.06                              | 0.31                     |
| 4                   | 2                   | 3.8523    | 9.7151 | 2.926               | 1.74                       | 2.09                   | -8.56                               | 0.36                     |
| 4                   | 3                   | 3.8477    | 9.7241 | 2.957               | 1.63                       | 2.18                   | -7.59                               | 0.57                     |
| 4                   | 4                   | 3.8446    | 9.7204 | 2.983               | 1.55                       | 2.15                   | -6.78                               | 0.61                     |
| 4                   | 5                   | 3.8399    | 9.7180 | 3.014               | 1.43                       | 2.12                   | -5.81                               | 0.71                     |
| 4                   | 6                   | 3.8363    | 9.7175 | 3.044               | 1.33                       | 2.12                   | -4.88                               | 0.80                     |
| 4                   | 7                   | 3.8312    | 9.7129 | 3.077               | 1.20                       | 2.07                   | -3.84                               | 0.89                     |
| 4                   | 8                   | 3.8275    | 9.7135 | 3.109               | 1.11                       | 2.08                   | -2.84                               | 0.99                     |
| 4                   | 9                   | 3.8241    | 9.7044 | 3.139               | 1.02                       | 1.98                   | -1.91                               | 0.98                     |
| 4                   | 10                  | 3.8199    | 9.7013 | 3.173               | 0.91                       | 1.95                   | -0.84                               | 1.06                     |
| 5                   | 0                   | 3.8703    | 9.7414 | 2.995               | 2.20                       | 2.36                   | -6.41                               | 0.16                     |
| 5                   | 2                   | 3.8643    | 9.7304 | 3.045               | 2.05                       | 2.25                   | -4.84                               | 0.20                     |
| 5                   | 3                   | 3.8607    | 9.7349 | 3.075               | 1.96                       | 2.29                   | -3.91                               | 0.34                     |
| 5                   | 4                   | 3.8569    | 9.7353 | 3.105               | 1.86                       | 2.29                   | -2.97                               | 0.44                     |
| 5                   | 5                   | 3.8525    | 9.7373 | 3.138               | 1.75                       | 2.32                   | -1.94                               | 0.58                     |

|    |    |        |        |       |      |      |       |       |
|----|----|--------|--------|-------|------|------|-------|-------|
| 5  | 6  | 3.8485 | 9.7325 | 3.169 | 1.65 | 2.27 | -0.97 | 0.63  |
| 5  | 7  | 3.8459 | 9.7209 | 3.195 | 1.58 | 2.15 | -0.16 | 0.58  |
| 5  | 8  | 3.8398 | 9.7233 | 3.237 | 1.43 | 2.18 | 1.16  | 0.77  |
| 5  | 9  | 3.8359 | 9.7207 | 3.272 | 1.32 | 2.15 | 2.25  | 0.84  |
| 5  | 10 | 3.8326 | 9.7077 | 3.303 | 1.24 | 2.02 | 3.22  | 0.79  |
| 6  | 0  | 3.8823 | 9.7572 | 3.118 | 2.50 | 2.51 | -2.56 | 0.01  |
| 6  | 2  | 3.8762 | 9.7463 | 3.170 | 2.35 | 2.41 | -0.94 | 0.06  |
| 6  | 3  | 3.8728 | 9.7401 | 3.199 | 2.26 | 2.34 | -0.03 | 0.08  |
| 6  | 4  | 3.8679 | 9.7576 | 3.237 | 2.14 | 2.52 | 1.16  | 0.39  |
| 6  | 5  | 3.8650 | 9.7473 | 3.264 | 2.07 | 2.42 | 2.00  | 0.36  |
| 6  | 6  | 3.8602 | 9.7455 | 3.301 | 1.94 | 2.40 | 3.16  | 0.46  |
| 6  | 7  | 3.8565 | 9.7385 | 3.333 | 1.85 | 2.33 | 4.16  | 0.49  |
| 6  | 8  | 3.8534 | 9.7310 | 3.365 | 1.77 | 2.25 | 5.16  | 0.49  |
| 6  | 9  | 3.8482 | 9.7328 | 3.408 | 1.64 | 2.27 | 6.50  | 0.64  |
| 6  | 10 | 3.8437 | 9.7280 | 3.446 | 1.53 | 2.22 | 7.69  | 0.71  |
| 7  | 0  | 3.8935 | 9.7886 | 3.249 | 2.78 | 2.83 | 1.53  | 0.05  |
| 7  | 2  | 3.8878 | 9.7626 | 3.301 | 2.64 | 2.57 | 3.16  | -0.07 |
| 7  | 3  | 3.8845 | 9.7569 | 3.331 | 2.56 | 2.51 | 4.09  | -0.05 |
| 7  | 4  | 3.8812 | 9.7509 | 3.362 | 2.47 | 2.45 | 5.06  | -0.02 |
| 7  | 5  | 3.8747 | 9.7717 | 3.408 | 2.31 | 2.66 | 6.50  | 0.36  |
| 7  | 6  | 3.8714 | 9.7652 | 3.441 | 2.23 | 2.59 | 7.53  | 0.38  |
| 7  | 7  | 3.8682 | 9.7609 | 3.475 | 2.15 | 2.55 | 8.59  | 0.41  |
| 7  | 8  | 3.8652 | 9.7467 | 3.507 | 2.07 | 2.41 | 9.59  | 0.35  |
| 7  | 9  | 3.8599 | 9.7480 | 3.550 | 1.94 | 2.42 | 10.94 | 0.50  |
| 7  | 10 | 3.8563 | 9.7435 | 3.590 | 1.84 | 2.38 | 12.19 | 0.55  |
| 8  | 0  | 3.9044 | 9.8081 | 3.384 | 3.05 | 3.02 | 5.75  | -0.04 |
| 8  | 2  | 3.8981 | 9.7993 | 3.444 | 2.90 | 2.93 | 7.62  | 0.04  |
| 8  | 3  | 3.8928 | 9.7958 | 3.482 | 2.77 | 2.90 | 8.81  | 0.14  |
| 8  | 4  | 3.8902 | 9.7930 | 3.513 | 2.70 | 2.87 | 9.78  | 0.17  |
| 8  | 5  | 3.8865 | 9.7880 | 3.547 | 2.61 | 2.82 | 10.84 | 0.22  |
| 8  | 6  | 3.8828 | 9.7830 | 3.583 | 2.52 | 2.77 | 11.97 | 0.26  |
| 8  | 7  | 3.8794 | 9.7781 | 3.619 | 2.43 | 2.72 | 13.09 | 0.30  |
| 8  | 8  | 3.8757 | 9.7730 | 3.658 | 2.34 | 2.67 | 14.31 | 0.34  |
| 8  | 9  | 3.8707 | 9.7712 | 3.702 | 2.21 | 2.65 | 15.69 | 0.46  |
| 8  | 10 | 3.8674 | 9.7604 | 3.742 | 2.13 | 2.55 | 16.94 | 0.43  |
| 9  | 0  | 3.9146 | 9.8345 | 3.528 | 3.31 | 3.28 | 10.25 | -0.03 |
| 9  | 2  | 3.9076 | 9.8203 | 3.590 | 3.13 | 3.14 | 12.19 | 0.01  |
| 9  | 3  | 3.9043 | 9.8157 | 3.623 | 3.05 | 3.10 | 13.22 | 0.04  |
| 9  | 4  | 3.9008 | 9.8113 | 3.658 | 2.97 | 3.05 | 14.31 | 0.09  |
| 9  | 5  | 3.8966 | 9.8073 | 3.696 | 2.86 | 3.01 | 15.50 | 0.16  |
| 9  | 6  | 3.8930 | 9.8067 | 3.735 | 2.77 | 3.01 | 16.72 | 0.24  |
| 9  | 7  | 3.8892 | 9.8016 | 3.774 | 2.68 | 2.96 | 17.94 | 0.29  |
| 9  | 8  | 3.8859 | 9.7951 | 3.812 | 2.59 | 2.89 | 19.13 | 0.31  |
| 9  | 9  | 3.8826 | 9.7878 | 3.852 | 2.51 | 2.82 | 20.38 | 0.32  |
| 9  | 10 | 3.8780 | 9.7832 | 3.898 | 2.39 | 2.77 | 21.81 | 0.39  |
| 10 | 0  | 3.9250 | 9.8568 | 3.672 | 3.56 | 3.50 | 14.75 | -0.07 |

|    |    |        |        |       |      |      |       |      |
|----|----|--------|--------|-------|------|------|-------|------|
| 10 | 2  | 3.9183 | 9.8474 | 3.738 | 3.40 | 3.41 | 16.81 | 0.01 |
| 10 | 3  | 3.9148 | 9.8422 | 3.772 | 3.31 | 3.36 | 17.88 | 0.05 |
| 10 | 4  | 3.9113 | 9.8365 | 3.808 | 3.23 | 3.30 | 19.00 | 0.08 |
| 10 | 5  | 3.9078 | 9.8262 | 3.844 | 3.14 | 3.20 | 20.13 | 0.06 |
| 10 | 6  | 3.9041 | 9.8212 | 3.883 | 3.05 | 3.15 | 21.34 | 0.11 |
| 10 | 7  | 3.9002 | 9.8187 | 3.925 | 2.95 | 3.13 | 22.66 | 0.18 |
| 10 | 8  | 3.8959 | 9.8144 | 3.969 | 2.84 | 3.08 | 24.03 | 0.25 |
| 10 | 9  | 3.8927 | 9.8092 | 4.011 | 2.76 | 3.03 | 25.34 | 0.28 |
| 10 | 10 | 3.8886 | 9.8032 | 4.058 | 2.66 | 2.97 | 26.81 | 0.32 |

**Table S12.** Influence of  $U_d$  and  $U_p$  on anatase  $\text{TiO}_2$  DFT+U (PBE) predicted lattice parameters ( $a = b$ ,  $c$ ) and bandgap ( $E_g$ ) [Extrapolation]

| $U_d$ (eV) | $U_p$ (eV) | $a = b$ (Å) | $c$ (Å) | $E_g$ (eV) |
|------------|------------|-------------|---------|------------|
| 1          | 11         | 3.7751      | 9.6747  | 2.854      |
| 2          | 15         | 3.7710      | 9.6548  | 3.096      |
| 4          | 14         | 3.8025      | 9.6718  | 3.319      |
| 7          | 15         | 3.8334      | 9.7126  | 3.821      |
| 9          | 14         | 3.8608      | 9.7508  | 4.095      |
| 10         | 14         | 3.8711      | 9.7735  | 4.265      |
| 11         | 4          | 3.9214      | 9.8581  | 3.961      |
| 12         | 2          | 3.9378      | 9.8935  | 4.041      |
| 13         | 15         | 3.8975      | 9.8310  | 4.837      |
| 15         | 0          | 3.9724      | 9.9767  | 4.427      |

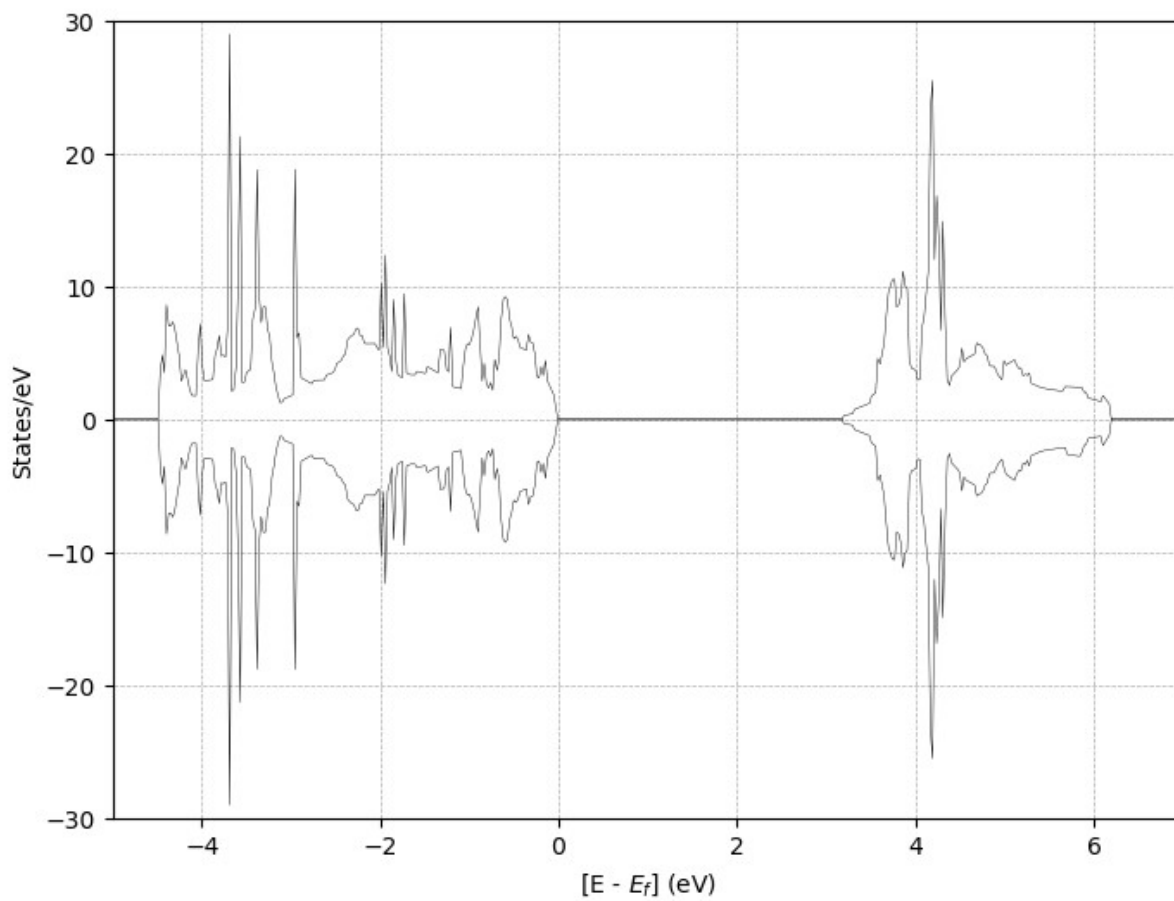

**Figure S30.** DOS for anatase  $\text{TiO}_2$  with PBE functional:  $U_p = 3$  eV,  $U_d = 6$  eV

**ZnO:**



**rPBE:**

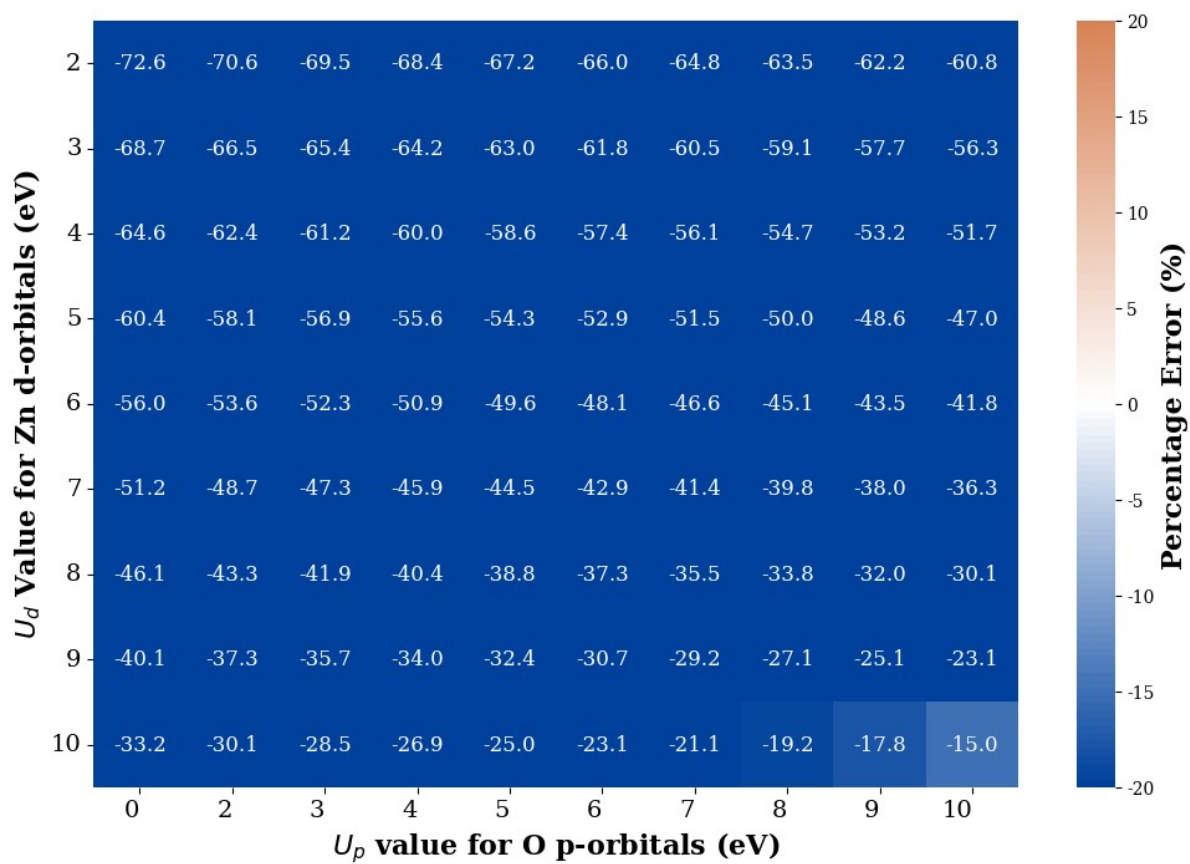

**Figure S31.** Heatmap of rPBE predicted band gap for cubic ZnO as a function of the  $U_d$  and  $U_p$  parameters.

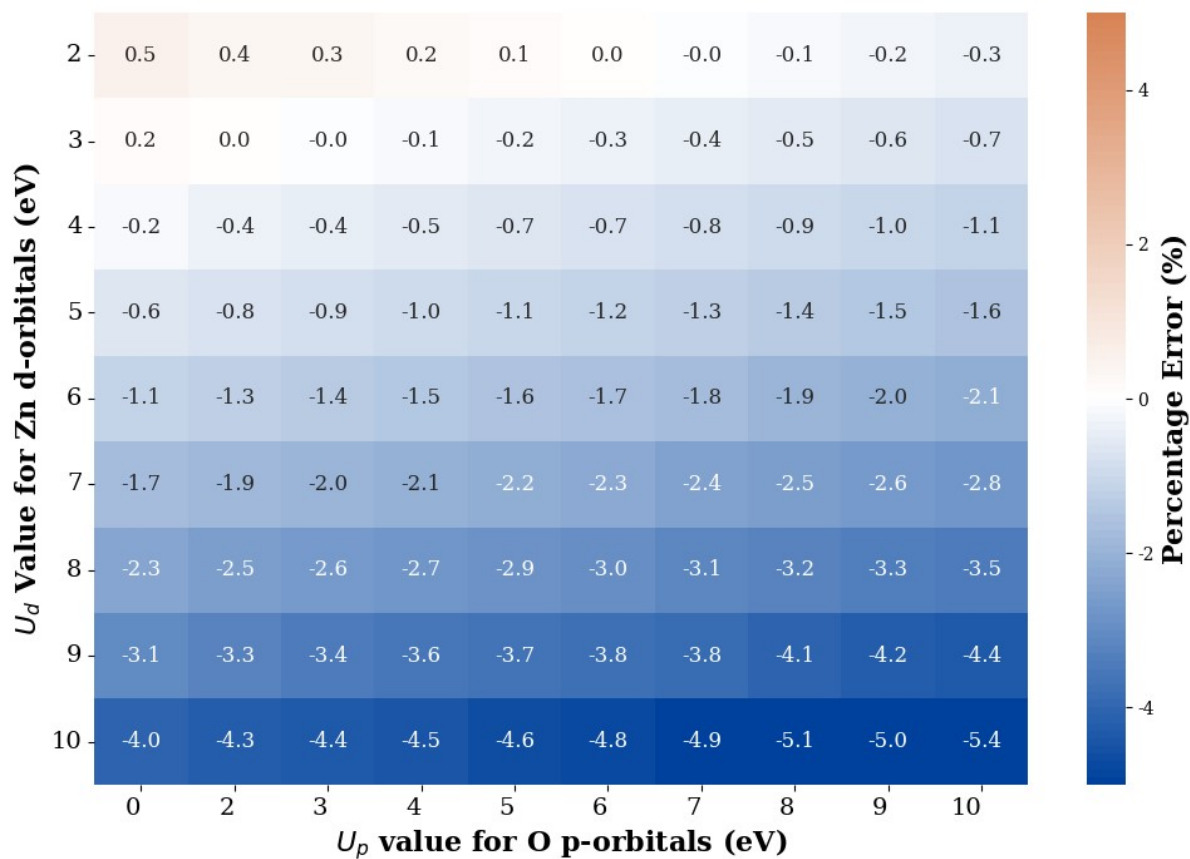

**Figure S32.** Heatmap of rPBE predicted lattice constant ( $a = b = c$ ) for cubic ZnO as a function of the  $U_d$  and  $U_p$  parameters.

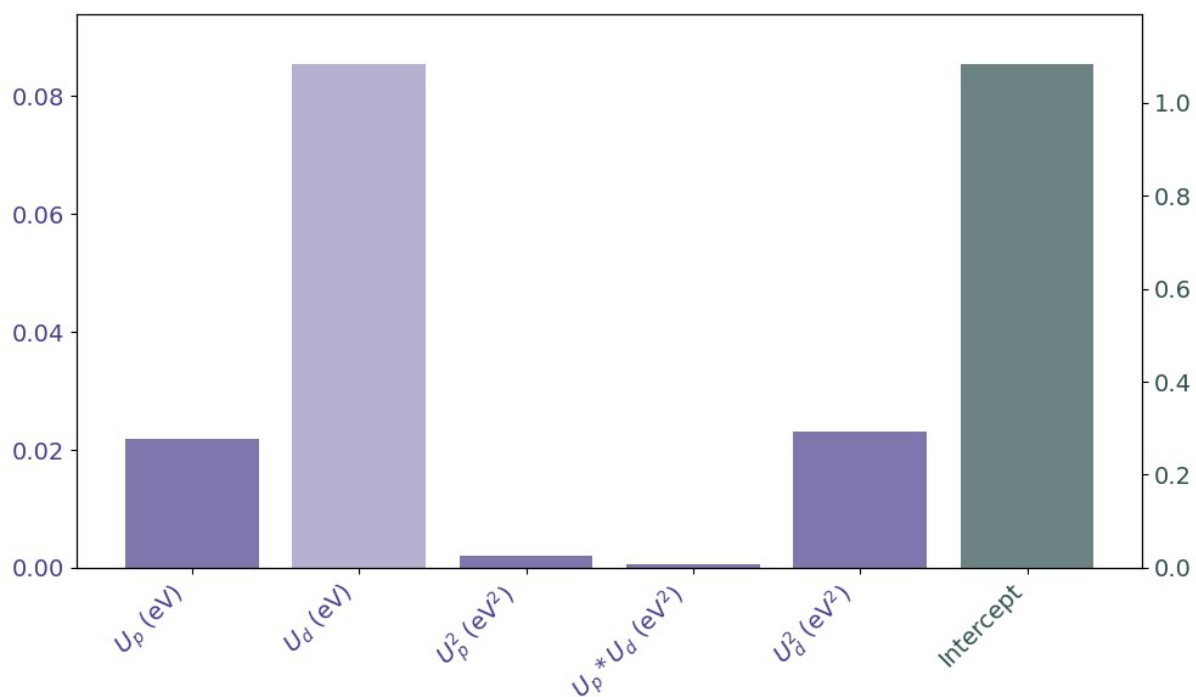

**Figure S33.** Feature importance of the PR model for predicting the rPBE band gap of c-ZnO. Lighter shades indicate features with negative contributions.

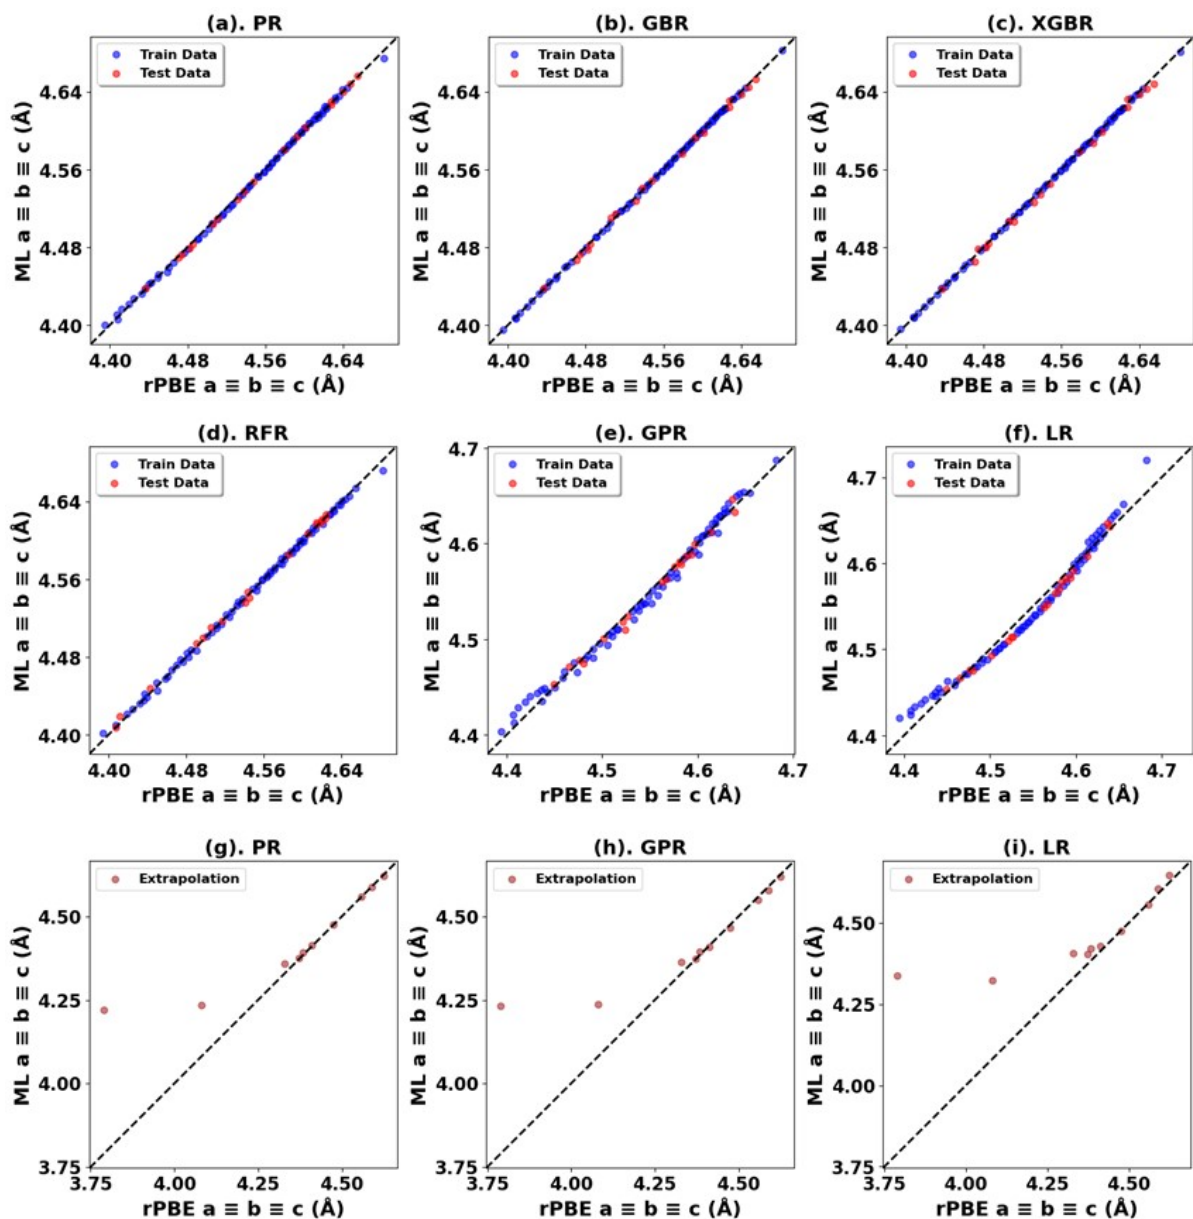

**Figure S34.** (a) - (f) Performance of models for rPBE lattice parameter ( $a = b = c$ ) prediction of c-ZnO using the initial range of  $U_p$  from 0.00 eV to 10.00 eV and  $U_d$  from 2.00 eV to 10.00 eV. (g) - (i) Performance of top three models in extrapolation using  $U_p$  and  $U_d$  values beyond these initial ranges.

**Table S13.** Comparative performance of models for rPBE lattice constant ( $a = b = c$ ) prediction in cubic ZnO.

| Oxide     | Model | Initial Range          |                       |                      |       | Extrapolation          |                       |                      |       |
|-----------|-------|------------------------|-----------------------|----------------------|-------|------------------------|-----------------------|----------------------|-------|
|           |       | MSE ( $\text{\AA}^2$ ) | RMSE ( $\text{\AA}$ ) | MAE ( $\text{\AA}$ ) | $R^2$ | MSE ( $\text{\AA}^2$ ) | RMSE ( $\text{\AA}$ ) | MAE ( $\text{\AA}$ ) | $R^2$ |
| Cubic ZnO | *PR   | 0.00                   | 0.00                  | 0.00                 | 1.00  | 0.02                   | 0.15                  | 0.06                 | 0.64  |
|           | GPR   | 0.00                   | 0.00                  | 0.00                 | 1.00  | 0.02                   | 0.15                  | 0.07                 | 0.62  |
|           | LR    | 0.00                   | 0.01                  | 0.01                 | 0.97  | 0.04                   | 0.19                  | 0.10                 | 0.37  |

|  |      |      |      |      |      |      |      |      |      |
|--|------|------|------|------|------|------|------|------|------|
|  | RFR  | 0.00 | 0.01 | 0.00 | 0.99 | 0.06 | 0.24 | 0.13 | 0.05 |
|  | GBR  | 0.00 | 0.00 | 0.00 | 1.00 | 0.06 | 0.24 | 0.13 | 0.05 |
|  | XGBR | 0.00 | 0.01 | 0.00 | 0.99 | 0.06 | 0.24 | 0.13 | 0.05 |

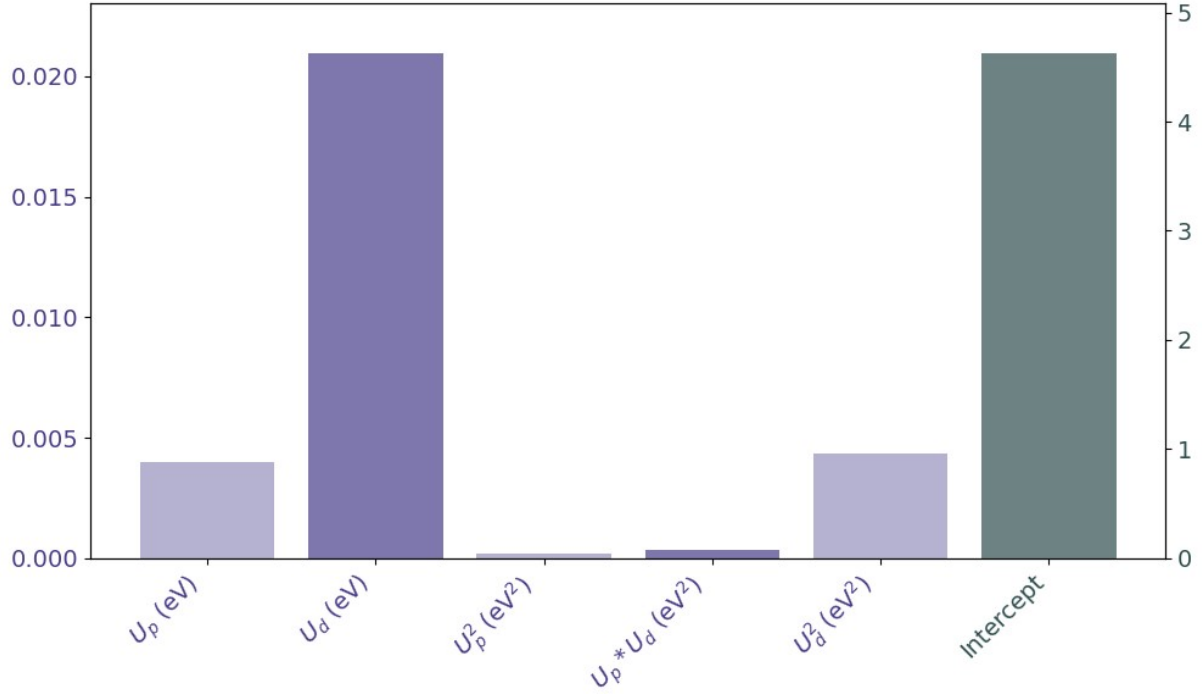

**Figure S35.** Feature importance of the PR model for predicting the rPBE lattice constant ( $a = b = c$ ) of c-ZnO. Lighter shades indicate features with negative contributions.

**Table S14.** Influence of  $U_d$  and  $U_p$  on cubic ZnO DFT+U (rPBE) predicted lattice parameters ( $a = b, c$ ) and bandgap ( $E_g$ )

| $U_d$ (eV) | $U_p$ (eV) | $a = b = c$ (Å) | $E_g$ (eV) | % Deviation in $a = b = c$ | % Deviation in $E_g$ |
|------------|------------|-----------------|------------|----------------------------|----------------------|
| 0          | 0          | 4.6823          | 0.658      | 1.13                       | -80.47               |
| 2          | 0          | 4.6549          | 0.923      | 0.54                       | -72.61               |
| 2          | 2          | 4.6479          | 0.992      | 0.39                       | -70.56               |
| 2          | 3          | 4.6441          | 1.029      | 0.30                       | -69.47               |
| 2          | 4          | 4.6402          | 1.066      | 0.22                       | -68.37               |
| 2          | 5          | 4.6361          | 1.105      | 0.13                       | -67.21               |
| 2          | 6          | 4.6320          | 1.145      | 0.04                       | -66.02               |
| 2          | 7          | 4.6277          | 1.187      | -0.05                      | -64.78               |
| 2          | 8          | 4.6233          | 1.231      | -0.15                      | -63.47               |
| 2          | 9          | 4.6190          | 1.275      | -0.24                      | -62.17               |
| 2          | 10         | 4.6143          | 1.322      | -0.34                      | -60.77               |
| 3          | 0          | 4.6390          | 1.056      | 0.20                       | -68.66               |
| 3          | 2          | 4.6316          | 1.128      | 0.04                       | -66.53               |
| 3          | 3          | 4.6278          | 1.166      | -0.05                      | -65.40               |

|   |    |        |       |       |        |
|---|----|--------|-------|-------|--------|
| 3 | 4  | 4.6238 | 1.206 | -0.13 | -64.21 |
| 3 | 5  | 4.6196 | 1.246 | -0.23 | -63.03 |
| 3 | 6  | 4.6153 | 1.289 | -0.32 | -61.75 |
| 3 | 7  | 4.6110 | 1.332 | -0.41 | -60.47 |
| 3 | 8  | 4.6065 | 1.378 | -0.51 | -59.11 |
| 3 | 9  | 4.6019 | 1.424 | -0.61 | -57.74 |
| 3 | 10 | 4.5971 | 1.473 | -0.71 | -56.29 |
| 4 | 0  | 4.6211 | 1.192 | -0.19 | -64.63 |
| 4 | 2  | 4.6134 | 1.268 | -0.36 | -62.37 |
| 4 | 3  | 4.6095 | 1.307 | -0.44 | -61.22 |
| 4 | 4  | 4.6050 | 1.349 | -0.54 | -59.97 |
| 4 | 5  | 4.5995 | 1.394 | -0.66 | -58.64 |
| 4 | 6  | 4.5969 | 1.435 | -0.71 | -57.42 |
| 4 | 7  | 4.5924 | 1.481 | -0.81 | -56.05 |
| 4 | 8  | 4.5879 | 1.528 | -0.91 | -54.66 |
| 4 | 9  | 4.5831 | 1.577 | -1.01 | -53.20 |
| 4 | 10 | 4.5781 | 1.628 | -1.12 | -51.69 |
| 5 | 0  | 4.6013 | 1.333 | -0.62 | -60.45 |
| 5 | 2  | 4.5935 | 1.412 | -0.79 | -58.10 |
| 5 | 3  | 4.5894 | 1.454 | -0.88 | -56.85 |
| 5 | 4  | 4.5852 | 1.497 | -0.97 | -55.58 |
| 5 | 5  | 4.5809 | 1.541 | -1.06 | -54.27 |
| 5 | 6  | 4.5763 | 1.587 | -1.16 | -52.91 |
| 5 | 7  | 4.5716 | 1.635 | -1.26 | -51.48 |
| 5 | 8  | 4.5668 | 1.685 | -1.37 | -50.00 |
| 5 | 9  | 4.5634 | 1.733 | -1.44 | -48.58 |
| 5 | 10 | 4.5585 | 1.786 | -1.54 | -47.00 |
| 6 | 0  | 4.5790 | 1.482 | -1.10 | -56.02 |
| 6 | 2  | 4.5708 | 1.565 | -1.28 | -53.56 |
| 6 | 3  | 4.5666 | 1.609 | -1.37 | -52.26 |
| 6 | 4  | 4.5629 | 1.653 | -1.45 | -50.95 |
| 6 | 5  | 4.5585 | 1.699 | -1.54 | -49.58 |
| 6 | 6  | 4.5530 | 1.749 | -1.66 | -48.10 |
| 6 | 7  | 4.5482 | 1.799 | -1.77 | -46.62 |
| 6 | 8  | 4.5432 | 1.851 | -1.87 | -45.07 |
| 6 | 9  | 4.5381 | 1.905 | -1.98 | -43.47 |
| 6 | 10 | 4.5332 | 1.961 | -2.09 | -41.81 |
| 7 | 0  | 4.5520 | 1.645 | -1.68 | -51.19 |
| 7 | 2  | 4.5449 | 1.730 | -1.84 | -48.66 |
| 7 | 3  | 4.5407 | 1.776 | -1.93 | -47.30 |
| 7 | 4  | 4.5361 | 1.823 | -2.03 | -45.91 |
| 7 | 5  | 4.5314 | 1.872 | -2.13 | -44.45 |
| 7 | 6  | 4.5265 | 1.924 | -2.23 | -42.91 |
| 7 | 7  | 4.5214 | 1.976 | -2.34 | -41.36 |
| 7 | 8  | 4.5167 | 2.030 | -2.45 | -39.76 |
| 7 | 9  | 4.5108 | 2.089 | -2.57 | -38.01 |

|    |    |        |       |       |        |
|----|----|--------|-------|-------|--------|
| 7  | 10 | 4.5054 | 2.148 | -2.69 | -36.26 |
| 8  | 0  | 4.5246 | 1.818 | -2.28 | -46.05 |
| 8  | 2  | 4.5158 | 1.911 | -2.47 | -43.29 |
| 8  | 3  | 4.5111 | 1.959 | -2.57 | -41.87 |
| 8  | 4  | 4.5062 | 2.010 | -2.67 | -40.36 |
| 8  | 5  | 4.5017 | 2.061 | -2.77 | -38.84 |
| 8  | 6  | 4.4973 | 2.114 | -2.87 | -37.27 |
| 8  | 7  | 4.4902 | 2.174 | -3.02 | -35.49 |
| 8  | 8  | 4.4850 | 2.232 | -3.13 | -33.77 |
| 8  | 9  | 4.4803 | 2.290 | -3.23 | -32.05 |
| 8  | 10 | 4.4740 | 2.354 | -3.37 | -30.15 |
| 9  | 0  | 4.4909 | 2.017 | -3.00 | -40.15 |
| 9  | 2  | 4.4822 | 2.114 | -3.19 | -37.27 |
| 9  | 3  | 4.4763 | 2.168 | -3.32 | -35.67 |
| 9  | 4  | 4.4703 | 2.224 | -3.45 | -34.01 |
| 9  | 5  | 4.4654 | 2.279 | -3.55 | -32.37 |
| 9  | 6  | 4.4607 | 2.335 | -3.66 | -30.71 |
| 9  | 7  | 4.4586 | 2.386 | -3.70 | -29.20 |
| 9  | 8  | 4.4492 | 2.457 | -3.90 | -27.09 |
| 9  | 9  | 4.4425 | 2.524 | -4.05 | -25.10 |
| 9  | 10 | 4.4367 | 2.591 | -4.17 | -23.12 |
| 10 | 0  | 4.4503 | 2.250 | -3.88 | -33.23 |
| 10 | 2  | 4.4399 | 2.357 | -4.11 | -30.06 |
| 10 | 3  | 4.4362 | 2.409 | -4.19 | -28.52 |
| 10 | 4  | 4.4323 | 2.463 | -4.27 | -26.91 |
| 10 | 5  | 4.4244 | 2.529 | -4.44 | -24.96 |
| 10 | 6  | 4.4191 | 2.590 | -4.55 | -23.15 |
| 10 | 7  | 4.4118 | 2.659 | -4.71 | -21.10 |
| 10 | 8  | 4.4071 | 2.722 | -4.81 | -19.23 |
| 10 | 9  | 4.4077 | 2.771 | -4.80 | -17.77 |
| 10 | 10 | 4.3944 | 2.864 | -5.09 | -15.01 |

---

**Table S15.** Influence of  $U_d$  and  $U_p$  on cubic ZnO DFT+U (rPBE) predicted lattice parameters ( $a = b, c$ ) and bandgap ( $E_g$ ) [Extrapolation]

| $U_d$ (eV) | $U_p$ (eV) | $a = b = c$ (Å) | $E_g$ (eV) |
|------------|------------|-----------------|------------|
| 1          | 11         | 4.6242          | 1.220      |
| 2          | 15         | 4.5884          | 1.583      |
| 4          | 14         | 4.5585          | 1.849      |
| 7          | 15         | 4.4756          | 2.480      |
| 9          | 14         | 4.4114          | 2.885      |
| 10         | 14         | 4.3724          | 3.164      |
| 11         | 4          | 4.3840          | 2.757      |
| 12         | 2          | 4.3285          | 3.021      |
| 13         | 15         | 4.0808          | 5.194      |
| 15         | 0          | 3.7887          | 5.935      |

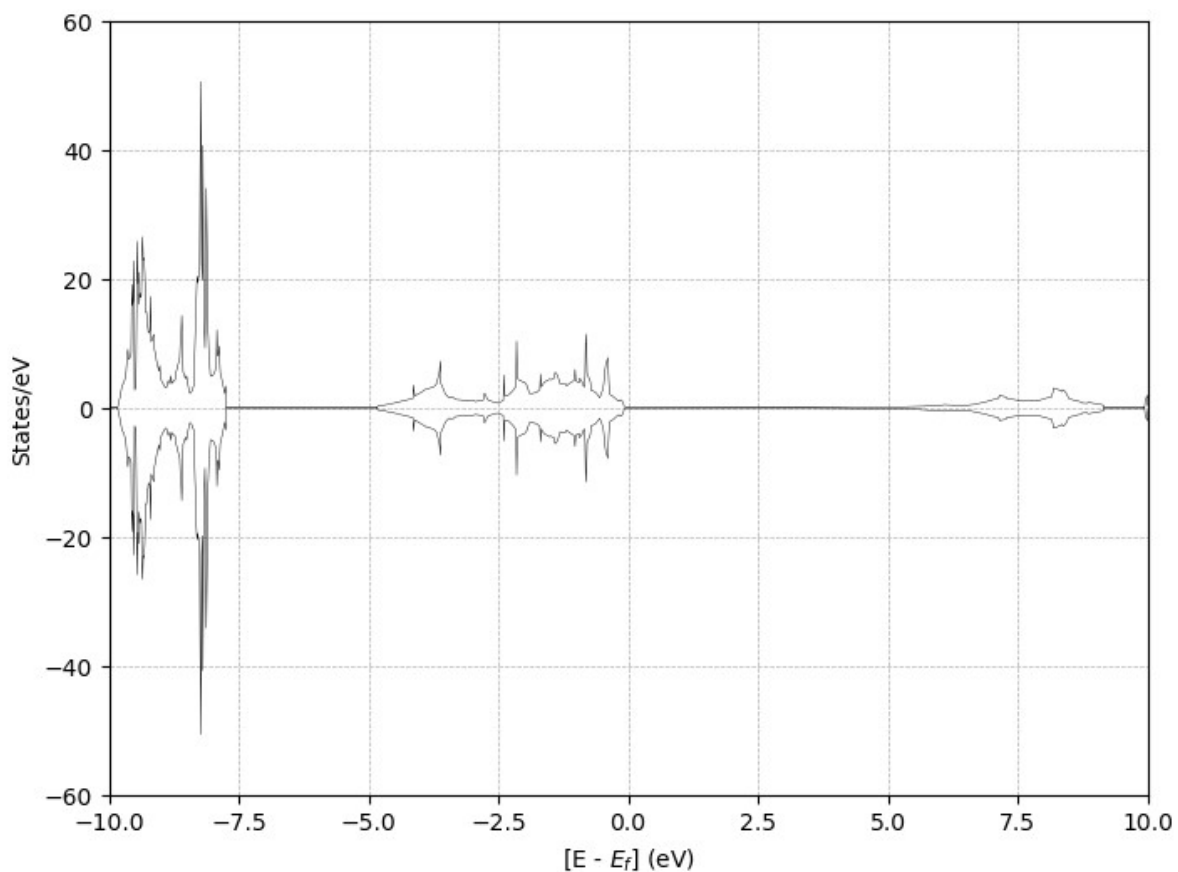

**Figure S36.** DOS for cubic ZnO with rPBE functional:  $U_p = 6$  eV,  $U_d = 12$  eV



**PBE:**

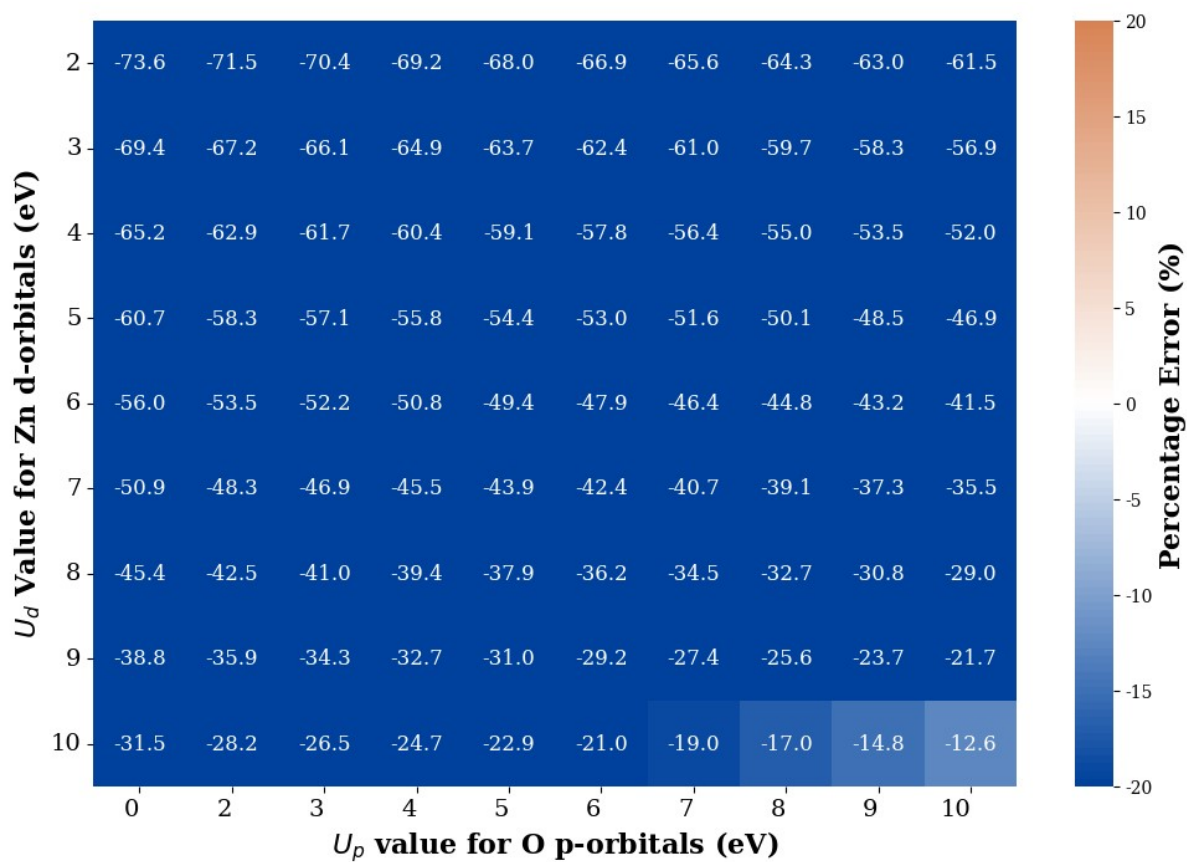

**Figure S37.** Heatmap of PBE predicted band gap for cubic ZnO as a function of the  $U_d$  and  $U_p$  parameters.

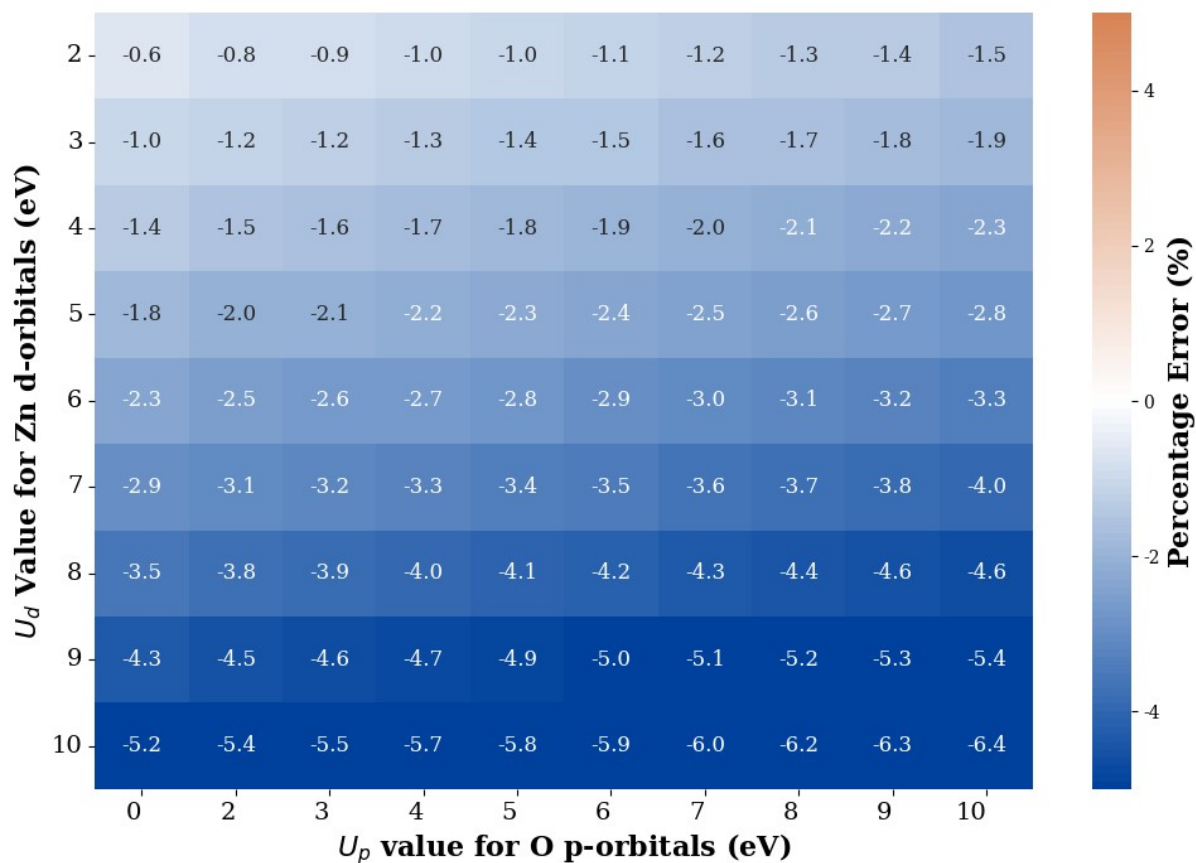

**Figure S38.** Heatmap of PBE predicted lattice constant ( $a = b = c$ ) for cubic ZnO as a function of the  $U_d$  and  $U_p$  parameters.

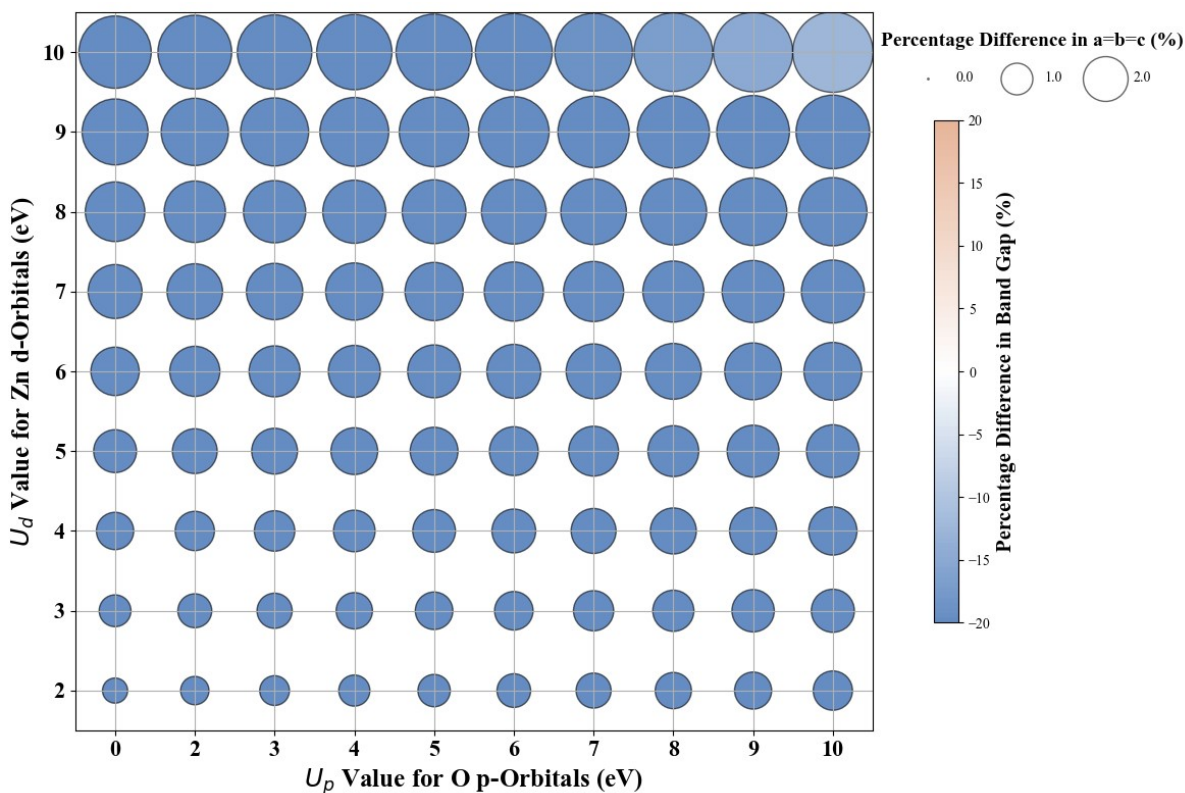

**Figure S39.** Effect of Hubbard U values on PBE band gap and lattice parameters of c-ZnO.**Table S16.** Influence of  $U_d$  and  $U_p$  on cubic ZnO DFT+U (PBE) predicted lattice parameters ( $a = b, c$ ) and bandgap ( $E_g$ )

| $U_d$ (eV) | $U_p$ (eV) | $a = b = c$ (Å) | $E_g$ (eV) | % Deviation in $a = b = c$ | % Deviation in $E_g$ |
|------------|------------|-----------------|------------|----------------------------|----------------------|
| 0          | 0          | 4.6291          | 0.615      | -0.02                      | -81.75               |
| 2          | 0          | 4.6007          | 0.891      | -0.63                      | -73.56               |
| 2          | 2          | 4.5928          | 0.962      | -0.80                      | -71.45               |
| 2          | 3          | 4.5890          | 0.999      | -0.89                      | -70.36               |
| 2          | 4          | 4.5851          | 1.037      | -0.97                      | -69.23               |
| 2          | 5          | 4.5816          | 1.077      | -1.05                      | -68.04               |
| 2          | 6          | 4.5775          | 1.117      | -1.13                      | -66.85               |
| 2          | 7          | 4.5732          | 1.160      | -1.23                      | -65.58               |
| 2          | 8          | 4.5692          | 1.203      | -1.31                      | -64.30               |
| 2          | 9          | 4.5664          | 1.246      | -1.37                      | -63.03               |
| 2          | 10         | 4.5585          | 1.298      | -1.54                      | -61.48               |
| 3          | 0          | 4.5831          | 1.032      | -1.01                      | -69.38               |
| 3          | 2          | 4.5766          | 1.104      | -1.15                      | -67.24               |
| 3          | 3          | 4.5728          | 1.143      | -1.24                      | -66.08               |
| 3          | 4          | 4.5688          | 1.183      | -1.32                      | -64.90               |
| 3          | 5          | 4.5647          | 1.224      | -1.41                      | -63.68               |
| 3          | 6          | 4.5613          | 1.266      | -1.48                      | -62.43               |
| 3          | 7          | 4.5552          | 1.313      | -1.61                      | -61.04               |
| 3          | 8          | 4.5516          | 1.358      | -1.69                      | -59.70               |
| 3          | 9          | 4.5470          | 1.405      | -1.79                      | -58.31               |
| 3          | 10         | 4.5441          | 1.452      | -1.86                      | -56.91               |
| 4          | 0          | 4.5655          | 1.174      | -1.39                      | -65.16               |
| 4          | 2          | 4.5585          | 1.250      | -1.54                      | -62.91               |
| 4          | 3          | 4.5541          | 1.291      | -1.64                      | -61.69               |
| 4          | 4          | 4.5499          | 1.334      | -1.73                      | -60.42               |
| 4          | 5          | 4.5454          | 1.377      | -1.83                      | -59.14               |
| 4          | 6          | 4.5410          | 1.422      | -1.92                      | -57.80               |
| 4          | 7          | 4.5365          | 1.469      | -2.02                      | -56.41               |
| 4          | 8          | 4.5319          | 1.517      | -2.12                      | -54.99               |
| 4          | 9          | 4.5272          | 1.567      | -2.22                      | -53.50               |
| 4          | 10         | 4.5222          | 1.618      | -2.33                      | -51.99               |
| 5          | 0          | 4.5449          | 1.324      | -1.84                      | -60.71               |
| 5          | 2          | 4.5371          | 1.404      | -2.01                      | -58.34               |
| 5          | 3          | 4.5330          | 1.447      | -2.10                      | -57.06               |
| 5          | 4          | 4.5287          | 1.491      | -2.19                      | -55.76               |
| 5          | 5          | 4.5243          | 1.536      | -2.28                      | -54.42               |
| 5          | 6          | 4.5197          | 1.583      | -2.38                      | -53.03               |
| 5          | 7          | 4.5150          | 1.632      | -2.48                      | -51.57               |

|    |    |        |       |       |        |
|----|----|--------|-------|-------|--------|
| 5  | 8  | 4.5102 | 1.683 | -2.59 | -50.06 |
| 5  | 9  | 4.5052 | 1.735 | -2.69 | -48.52 |
| 5  | 10 | 4.5012 | 1.788 | -2.78 | -46.94 |
| 6  | 0  | 4.5217 | 1.482 | -2.34 | -56.02 |
| 6  | 2  | 4.5137 | 1.566 | -2.51 | -53.53 |
| 6  | 3  | 4.5095 | 1.611 | -2.60 | -52.20 |
| 6  | 4  | 4.5050 | 1.657 | -2.70 | -50.83 |
| 6  | 5  | 4.5004 | 1.705 | -2.80 | -49.41 |
| 6  | 6  | 4.4953 | 1.756 | -2.91 | -47.89 |
| 6  | 7  | 4.4905 | 1.807 | -3.01 | -46.38 |
| 6  | 8  | 4.4855 | 1.860 | -3.12 | -44.81 |
| 6  | 9  | 4.4805 | 1.915 | -3.23 | -43.18 |
| 6  | 10 | 4.4752 | 1.973 | -3.34 | -41.45 |
| 7  | 0  | 4.4954 | 1.653 | -2.91 | -50.95 |
| 7  | 2  | 4.4872 | 1.742 | -3.08 | -48.31 |
| 7  | 3  | 4.4830 | 1.788 | -3.18 | -46.94 |
| 7  | 4  | 4.4784 | 1.837 | -3.27 | -45.49 |
| 7  | 5  | 4.4733 | 1.889 | -3.38 | -43.95 |
| 7  | 6  | 4.4680 | 1.942 | -3.50 | -42.37 |
| 7  | 7  | 4.4627 | 1.997 | -3.61 | -40.74 |
| 7  | 8  | 4.4577 | 2.053 | -3.72 | -39.08 |
| 7  | 9  | 4.4520 | 2.112 | -3.85 | -37.33 |
| 7  | 10 | 4.4466 | 2.172 | -3.96 | -35.55 |
| 8  | 0  | 4.4657 | 1.841 | -3.55 | -45.37 |
| 8  | 2  | 4.4557 | 1.938 | -3.76 | -42.49 |
| 8  | 3  | 4.4508 | 1.989 | -3.87 | -40.98 |
| 8  | 4  | 4.4458 | 2.041 | -3.98 | -39.44 |
| 8  | 5  | 4.4417 | 2.093 | -4.07 | -37.89 |
| 8  | 6  | 4.4366 | 2.149 | -4.18 | -36.23 |
| 8  | 7  | 4.4306 | 2.208 | -4.31 | -34.48 |
| 8  | 8  | 4.4248 | 2.269 | -4.43 | -32.67 |
| 8  | 9  | 4.4190 | 2.332 | -4.56 | -30.80 |
| 8  | 10 | 4.4147 | 2.392 | -4.65 | -29.02 |
| 9  | 0  | 4.4288 | 2.061 | -4.35 | -38.84 |
| 9  | 2  | 4.4208 | 2.159 | -4.52 | -35.93 |
| 9  | 3  | 4.4157 | 2.213 | -4.63 | -34.33 |
| 9  | 4  | 4.4105 | 2.268 | -4.74 | -32.70 |
| 9  | 5  | 4.4054 | 2.325 | -4.85 | -31.01 |
| 9  | 6  | 4.4000 | 2.385 | -4.97 | -29.23 |
| 9  | 7  | 4.3945 | 2.446 | -5.09 | -27.42 |
| 9  | 8  | 4.3895 | 2.508 | -5.19 | -25.58 |
| 9  | 9  | 4.3852 | 2.570 | -5.29 | -23.74 |
| 9  | 10 | 4.3794 | 2.638 | -5.41 | -21.72 |
| 10 | 0  | 4.3883 | 2.310 | -5.22 | -31.45 |
| 10 | 2  | 4.3782 | 2.420 | -5.44 | -28.19 |
| 10 | 3  | 4.3731 | 2.478 | -5.55 | -26.47 |

|    |    |        |       |       |        |
|----|----|--------|-------|-------|--------|
| 10 | 4  | 4.3679 | 2.537 | -5.66 | -24.72 |
| 10 | 5  | 4.3624 | 2.598 | -5.78 | -22.91 |
| 10 | 6  | 4.3566 | 2.663 | -5.90 | -20.98 |
| 10 | 7  | 4.3506 | 2.729 | -6.03 | -19.02 |
| 10 | 8  | 4.3446 | 2.798 | -6.17 | -16.97 |
| 10 | 9  | 4.3382 | 2.870 | -6.30 | -14.84 |
| 10 | 10 | 4.3314 | 2.946 | -6.45 | -12.58 |

**Table S17.** Influence of  $U_d$  and  $U_p$  on cubic ZnO DFT+U (PBE) predicted lattice parameters ( $a = b, c$ ) and bandgap ( $E_g$ ) [Extrapolation]

| $U_d$ (eV) | $U_p$ (eV) | $a = b = c$ (Å) | $E_g$ (eV) |
|------------|------------|-----------------|------------|
| 1          | 11         | 4.5692          | 1.190      |
| 2          | 15         | 4.5340          | 1.561      |
| 4          | 14         | 4.4808          | 1.888      |
| 7          | 15         | 4.4152          | 2.515      |
| 9          | 14         | 4.3499          | 2.951      |
| 10         | 14         | 4.3030          | 3.277      |
| 11         | 4          | 4.3156          | 2.866      |
| 12         | 2          | 4.2626          | 3.151      |
| 15         | 0          | 4.0938          | 4.756      |

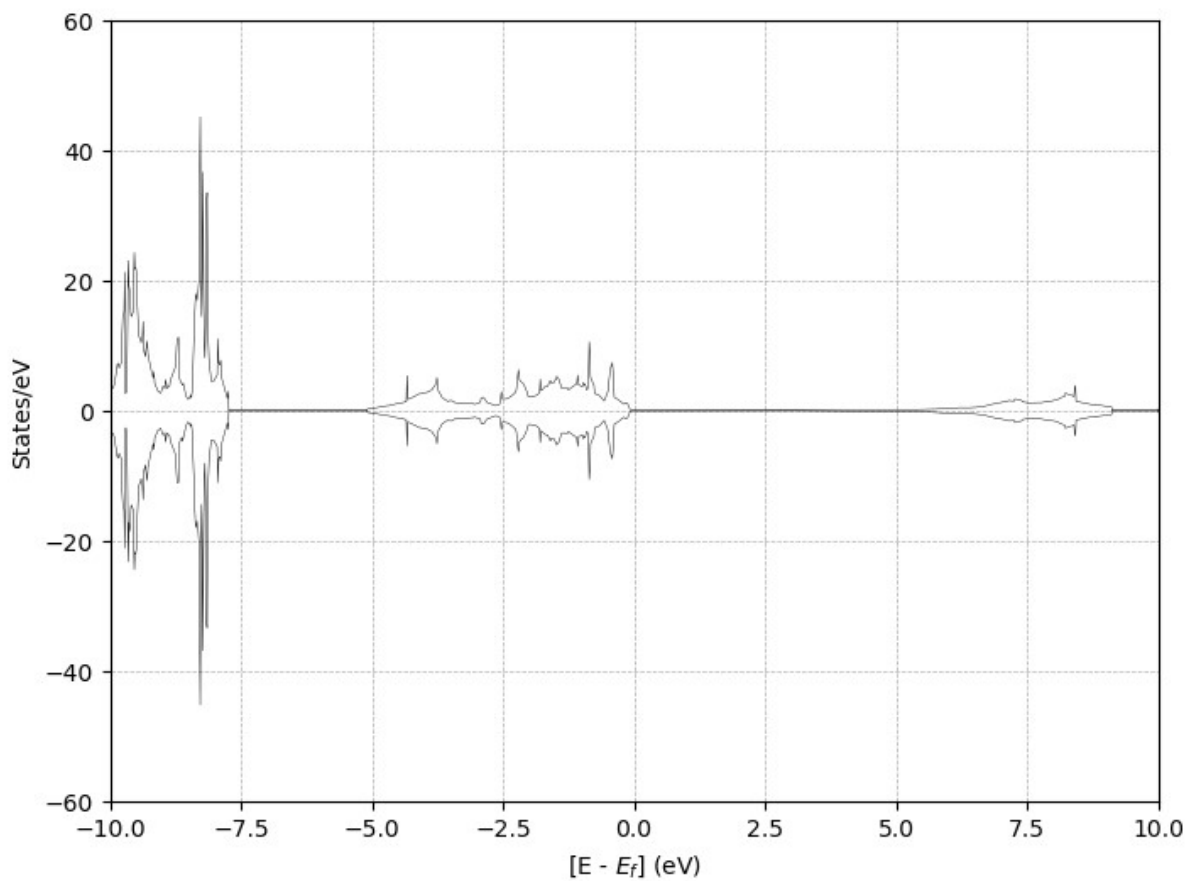

**Figure S40.** DOS for cubic ZnO with PBE functional:  $U_p = 5$  eV,  $U_d = 12$  eV

**ZnO<sub>2</sub>:**

rPBE:

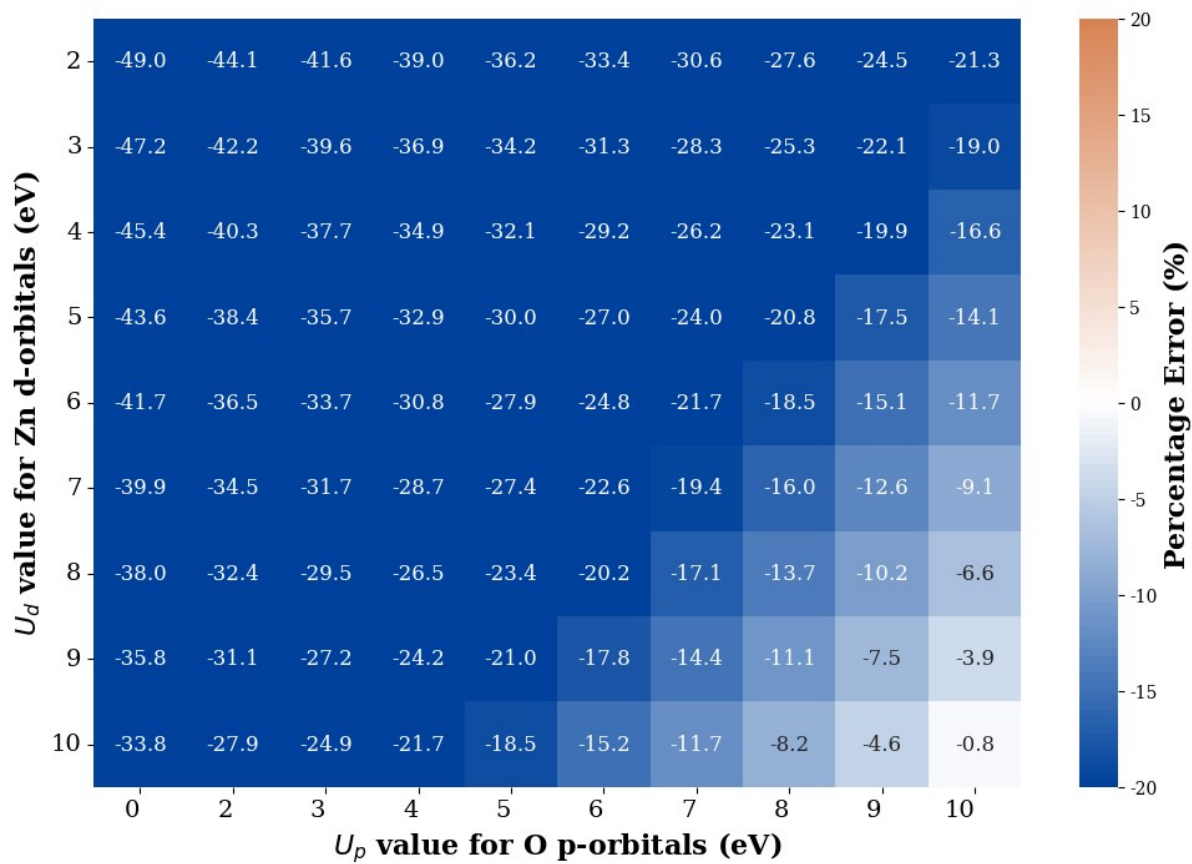

**Figure S41.** Heatmap of rPBE predicted band gap for cubic ZnO<sub>2</sub> as a function of the  $U_d$  and  $U_p$  parameters.

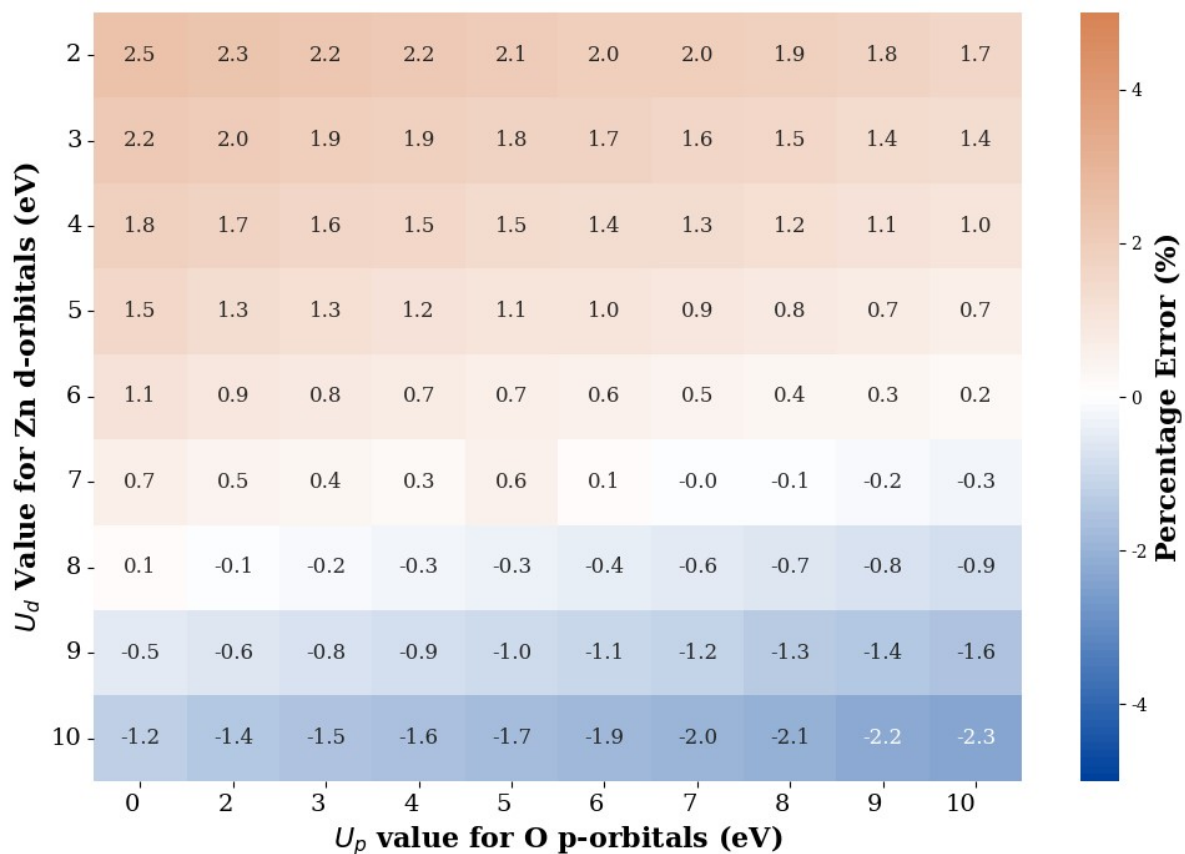

**Figure S42.** Heatmap of rPBE predicted lattice constant ( $a = b = c$ ) for cubic  $\text{ZnO}_2$  as a function of the  $U_d$  and  $U_p$  parameters.



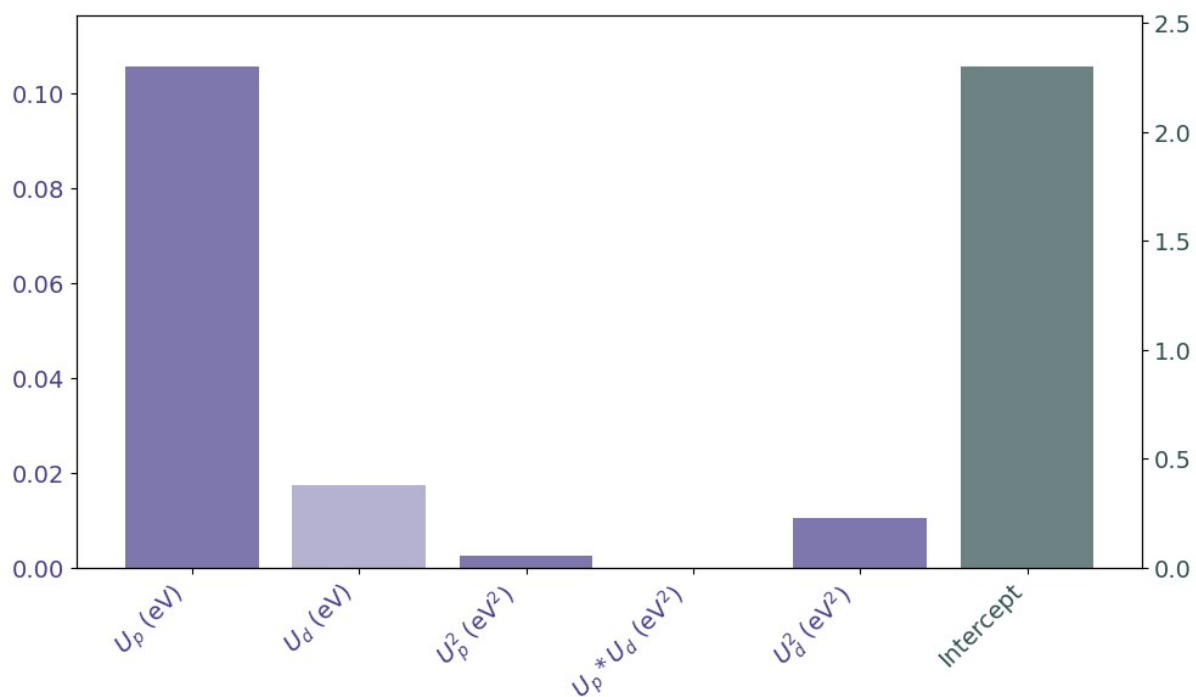

**Figure S43.** Feature importance of the PR model for predicting the rPBE band gap of c-ZnO<sub>2</sub>. Lighter shades indicate features with negative contributions.

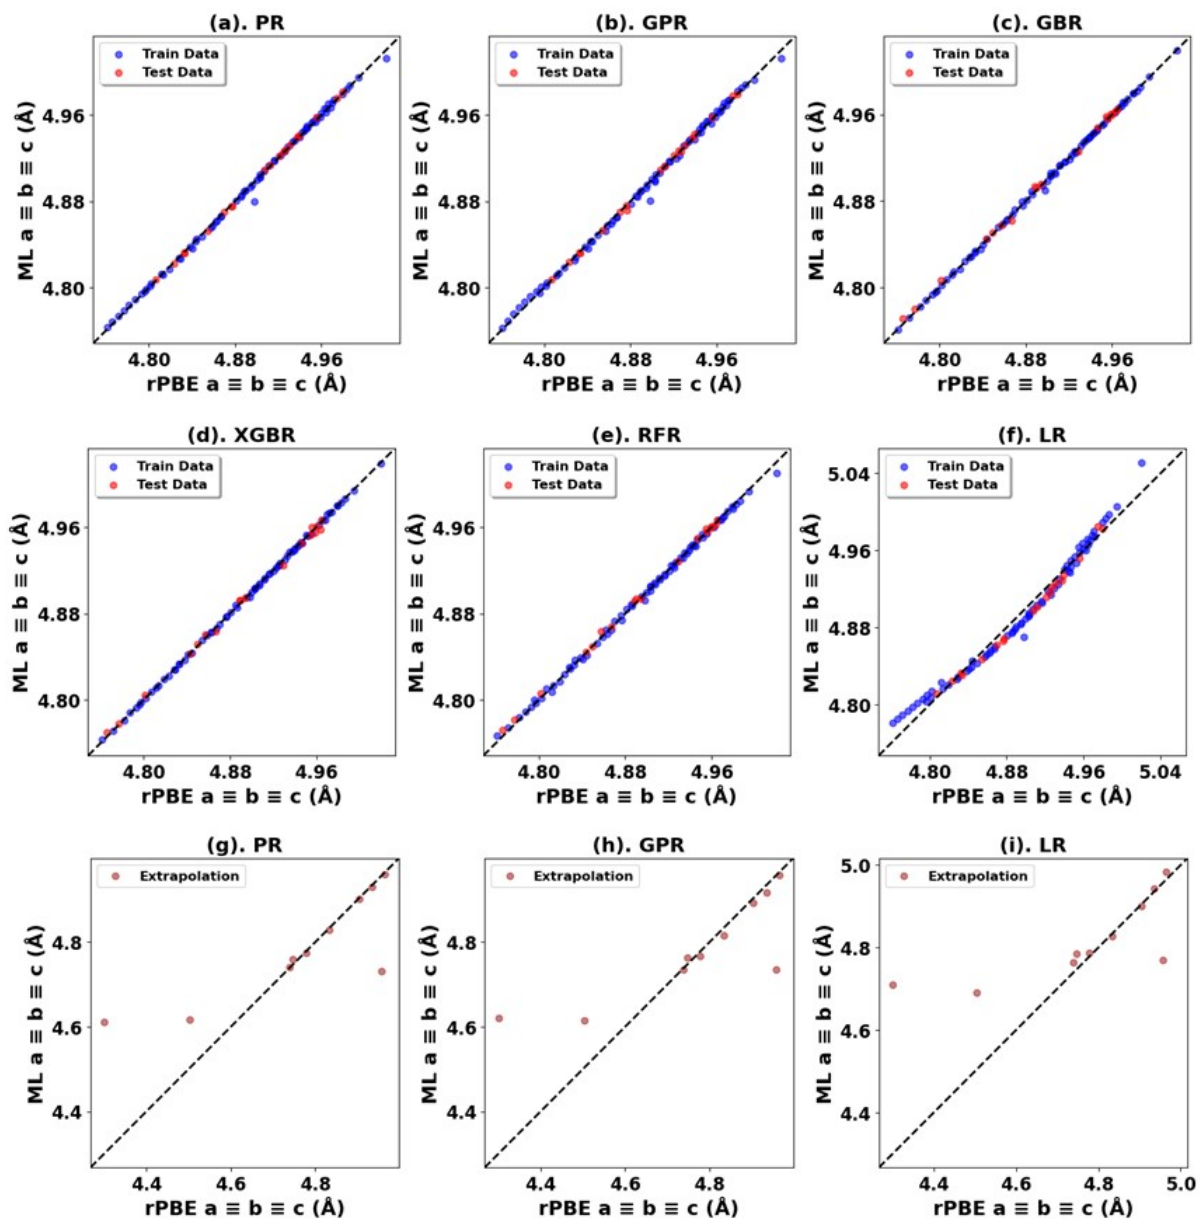

**Figure S44.** (a) - (f) Performance of models for rPBE lattice parameter ( $a = b = c$ ) prediction of c-ZnO<sub>2</sub> using the initial range of  $U_p$  from 0.00 eV to 10.00 eV and  $U_d$  from 2.00 eV to 10.00 eV. (g) - (i) Performance of top three models in extrapolation using  $U_p$  and  $U_d$  values beyond these initial ranges.

**Table S18.** Comparative performance of models for rPBE lattice constant ( $a = b = c$ ) prediction in cubic ZnO<sub>2</sub>.

| Oxide                  | Model | Initial Range         |          |         |                | Extrapolation         |          |         |                |
|------------------------|-------|-----------------------|----------|---------|----------------|-----------------------|----------|---------|----------------|
|                        |       | MSE (Å <sup>2</sup> ) | RMSE (Å) | MAE (Å) | R <sup>2</sup> | MSE (Å <sup>2</sup> ) | RMSE (Å) | MAE (Å) | R <sup>2</sup> |
| Cubic ZnO <sub>2</sub> | *PR   | 0.00                  | 0.00     | 0.00    | 1.00           | 0.02                  | 0.13     | 0.07    | 0.61           |
|                        | GPR   | 0.00                  | 0.00     | 0.00    | 1.00           | 0.02                  | 0.13     | 0.07    | 0.60           |
|                        | LR    | 0.00                  | 0.01     | 0.01    | 0.97           | 0.02                  | 0.16     | 0.09    | 0.42           |

|  |      |      |      |      |      |      |      |      |      |
|--|------|------|------|------|------|------|------|------|------|
|  | RFR  | 0.00 | 0.01 | 0.00 | 0.99 | 0.04 | 0.19 | 0.11 | 0.14 |
|  | GBR  | 0.00 | 0.00 | 0.00 | 0.99 | 0.04 | 0.19 | 0.11 | 0.14 |
|  | XGBR | 0.00 | 0.01 | 0.00 | 0.99 | 0.04 | 0.19 | 0.11 | 0.14 |

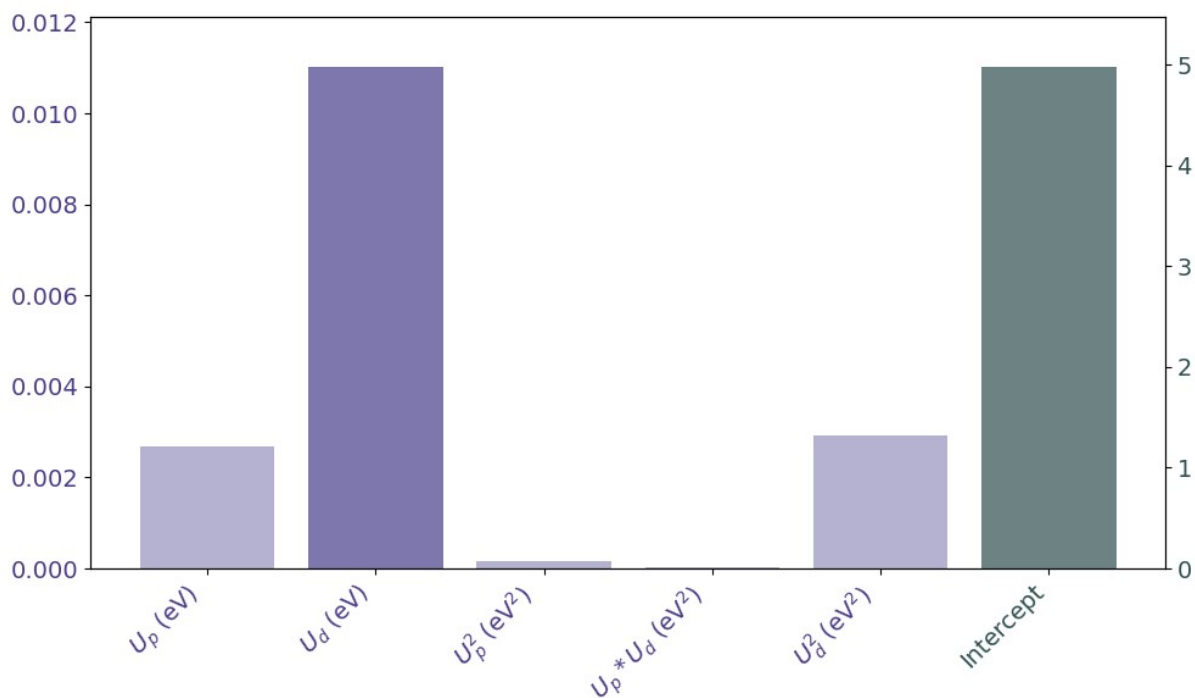

**Figure S45.** Feature importance of the PR model for predicting the rPBE lattice constant ( $a = b = c$ ) of c-ZnO<sub>2</sub>. Lighter shades indicate features with negative contributions.

**Table S19.** Influence of  $U_d$  and  $U_p$  on cubic ZnO<sub>2</sub> DFT+U (rPBE) predicted lattice parameters ( $a = b, c$ ) and bandgap ( $E_g$ )

| $U_d$ (eV) | $U_p$ (eV) | $a = b = c$ (Å) | $E_g$ (eV) | % Deviation in $a = b = c$ | % Deviation in $E_g$ |
|------------|------------|-----------------|------------|----------------------------|----------------------|
| 0          | 0          | 5.0199          | 2.130      | 3.06                       | -52.67               |
| 2          | 0          | 4.9945          | 2.295      | 2.53                       | -49.00               |
| 2          | 2          | 4.9865          | 2.514      | 2.37                       | -44.13               |
| 2          | 3          | 4.9831          | 2.629      | 2.30                       | -41.58               |
| 2          | 4          | 4.9794          | 2.746      | 2.22                       | -38.98               |
| 2          | 5          | 4.9745          | 2.870      | 2.12                       | -36.22               |
| 2          | 6          | 4.9701          | 2.995      | 2.03                       | -33.44               |
| 2          | 7          | 4.9686          | 3.124      | 2.00                       | -30.58               |
| 2          | 8          | 4.9637          | 3.258      | 1.90                       | -27.60               |
| 2          | 9          | 4.9588          | 3.397      | 1.80                       | -24.51               |
| 2          | 10         | 4.9546          | 3.540      | 1.72                       | -21.33               |
| 3          | 0          | 4.9796          | 2.376      | 2.23                       | -47.20               |

|   |    |        |       |       |        |
|---|----|--------|-------|-------|--------|
| 3 | 2  | 4.9716 | 2.601 | 2.07  | -42.20 |
| 3 | 3  | 4.9664 | 2.718 | 1.96  | -39.60 |
| 3 | 4  | 4.9649 | 2.838 | 1.93  | -36.93 |
| 3 | 5  | 4.9600 | 2.963 | 1.83  | -34.16 |
| 3 | 6  | 4.9558 | 3.092 | 1.74  | -31.29 |
| 3 | 7  | 4.9508 | 3.225 | 1.64  | -28.33 |
| 3 | 8  | 4.9468 | 3.362 | 1.56  | -25.29 |
| 3 | 9  | 4.9423 | 3.504 | 1.46  | -22.13 |
| 3 | 10 | 4.9397 | 3.647 | 1.41  | -18.96 |
| 4 | 0  | 4.9623 | 2.458 | 1.87  | -45.38 |
| 4 | 2  | 4.9556 | 2.686 | 1.74  | -40.31 |
| 4 | 3  | 4.9522 | 2.805 | 1.67  | -37.67 |
| 4 | 4  | 4.9466 | 2.930 | 1.55  | -34.89 |
| 4 | 5  | 4.9439 | 3.055 | 1.50  | -32.11 |
| 4 | 6  | 4.9394 | 3.187 | 1.40  | -29.18 |
| 4 | 7  | 4.9352 | 3.322 | 1.32  | -26.18 |
| 4 | 8  | 4.9309 | 3.462 | 1.23  | -23.07 |
| 4 | 9  | 4.9267 | 3.606 | 1.14  | -19.87 |
| 4 | 10 | 4.9223 | 3.755 | 1.05  | -16.56 |
| 5 | 0  | 4.9454 | 2.538 | 1.53  | -43.60 |
| 5 | 2  | 4.9374 | 2.771 | 1.36  | -38.42 |
| 5 | 3  | 4.9333 | 2.893 | 1.28  | -35.71 |
| 5 | 4  | 4.9291 | 3.019 | 1.19  | -32.91 |
| 5 | 5  | 4.9248 | 3.149 | 1.11  | -30.02 |
| 5 | 6  | 4.9206 | 3.283 | 1.02  | -27.04 |
| 5 | 7  | 4.9162 | 3.421 | 0.93  | -23.98 |
| 5 | 8  | 4.9113 | 3.565 | 0.83  | -20.78 |
| 5 | 9  | 4.9070 | 3.712 | 0.74  | -17.51 |
| 5 | 10 | 4.9029 | 3.866 | 0.66  | -14.09 |
| 6 | 0  | 4.9256 | 2.622 | 1.12  | -41.73 |
| 6 | 2  | 4.9164 | 2.859 | 0.93  | -36.47 |
| 6 | 3  | 4.9122 | 2.984 | 0.85  | -33.69 |
| 6 | 4  | 4.9075 | 3.113 | 0.75  | -30.82 |
| 6 | 5  | 4.9033 | 3.245 | 0.66  | -27.89 |
| 6 | 6  | 4.8997 | 3.384 | 0.59  | -24.80 |
| 6 | 7  | 4.8952 | 3.525 | 0.50  | -21.67 |
| 6 | 8  | 4.8898 | 3.668 | 0.39  | -18.49 |
| 6 | 9  | 4.8862 | 3.822 | 0.31  | -15.07 |
| 6 | 10 | 4.8809 | 3.973 | 0.20  | -11.71 |
| 7 | 0  | 4.9030 | 2.706 | 0.66  | -39.87 |
| 7 | 2  | 4.8942 | 2.949 | 0.48  | -34.47 |
| 7 | 3  | 4.8886 | 3.075 | 0.36  | -31.67 |
| 7 | 4  | 4.8853 | 3.209 | 0.29  | -28.69 |
| 7 | 5  | 4.8981 | 3.266 | 0.56  | -27.42 |
| 7 | 6  | 4.8762 | 3.485 | 0.11  | -22.56 |
| 7 | 7  | 4.8700 | 3.626 | -0.02 | -19.42 |

|    |    |        |       |       |        |
|----|----|--------|-------|-------|--------|
| 7  | 8  | 4.8670 | 3.778 | -0.08 | -16.04 |
| 7  | 9  | 4.8620 | 3.931 | -0.19 | -12.64 |
| 7  | 10 | 4.8573 | 4.089 | -0.28 | -9.13  |
| 8  | 0  | 4.8769 | 2.792 | 0.12  | -37.96 |
| 8  | 2  | 4.8672 | 3.041 | -0.08 | -32.42 |
| 8  | 3  | 4.8634 | 3.173 | -0.16 | -29.49 |
| 8  | 4  | 4.8588 | 3.307 | -0.25 | -26.51 |
| 8  | 5  | 4.8542 | 3.446 | -0.35 | -23.42 |
| 8  | 6  | 4.8495 | 3.589 | -0.44 | -20.24 |
| 8  | 7  | 4.8432 | 3.732 | -0.57 | -17.07 |
| 8  | 8  | 4.8382 | 3.884 | -0.67 | -13.69 |
| 8  | 9  | 4.8331 | 4.039 | -0.78 | -10.24 |
| 8  | 10 | 4.8280 | 4.201 | -0.88 | -6.64  |
| 9  | 0  | 4.8444 | 2.889 | -0.55 | -35.80 |
| 9  | 2  | 4.8407 | 3.100 | -0.62 | -31.11 |
| 9  | 3  | 4.8328 | 3.274 | -0.78 | -27.24 |
| 9  | 4  | 4.8290 | 3.411 | -0.86 | -24.20 |
| 9  | 5  | 4.8233 | 3.553 | -0.98 | -21.04 |
| 9  | 6  | 4.8190 | 3.699 | -1.07 | -17.80 |
| 9  | 7  | 4.8133 | 3.850 | -1.18 | -14.44 |
| 9  | 8  | 4.8067 | 4.001 | -1.32 | -11.09 |
| 9  | 9  | 4.8014 | 4.161 | -1.43 | -7.53  |
| 9  | 10 | 4.7958 | 4.325 | -1.54 | -3.89  |
| 10 | 0  | 4.8116 | 2.981 | -1.22 | -33.76 |
| 10 | 2  | 4.8022 | 3.244 | -1.41 | -27.91 |
| 10 | 3  | 4.7973 | 3.381 | -1.51 | -24.87 |
| 10 | 4  | 4.7929 | 3.523 | -1.60 | -21.71 |
| 10 | 5  | 4.7873 | 3.668 | -1.72 | -18.49 |
| 10 | 6  | 4.7818 | 3.817 | -1.83 | -15.18 |
| 10 | 7  | 4.7770 | 3.972 | -1.93 | -11.73 |
| 10 | 8  | 4.7716 | 4.131 | -2.04 | -8.20  |
| 10 | 9  | 4.7661 | 4.295 | -2.15 | -4.56  |
| 10 | 10 | 4.7614 | 4.464 | -2.25 | -0.80  |

---

**Table S20.** Influence of  $U_d$  and  $U_p$  on cubic  $ZnO_2$  DFT+U (rPBE) predicted lattice parameters ( $a = b, c$ ) and bandgap ( $E_g$ ) [Extrapolation]

| $U_d$ (eV) | $U_p$ (eV) | $a = b = c$ (Å) | $E_g$ (eV) |
|------------|------------|-----------------|------------|
| 1          | 11         | 4.9650          | 3.573      |
| 2          | 15         | 4.9351          | 4.323      |
| 4          | 14         | 4.9042          | 4.401      |
| 7          | 15         | 4.8337          | 4.959      |
| 9          | 14         | 4.7779          | 5.043      |
| 10         | 14         | 4.7387          | 5.193      |
| 11         | 4          | 4.7475          | 3.646      |
| 12         | 2          | 4.9573          | 3.283      |
| 13         | 15         | 4.5036          | 6.062      |
| 15         | 0          | 4.3008          | 5.189      |

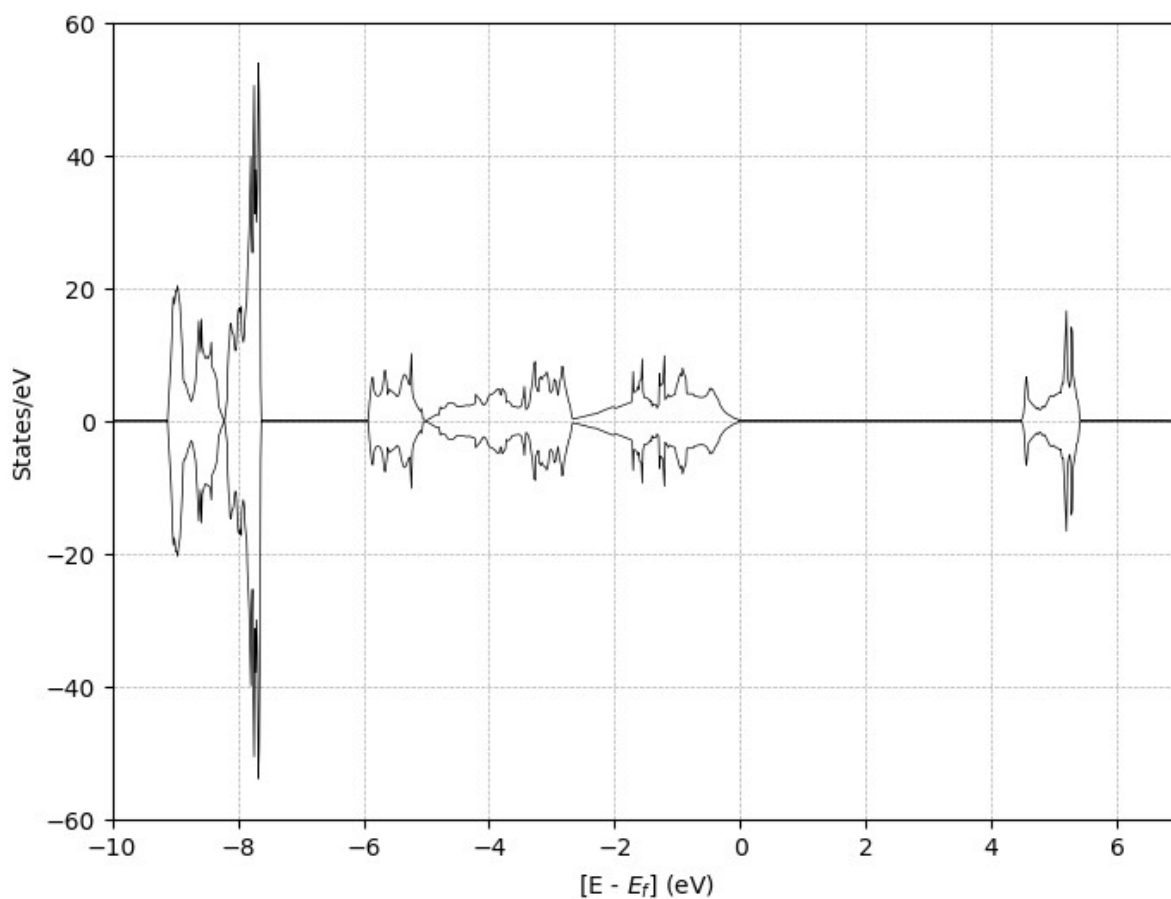

**Figure S46.** DOS for cubic  $ZnO_2$  with rPBE functional:  $U_p = 10$  eV,  $U_d = 10$  eV

**PBE:**

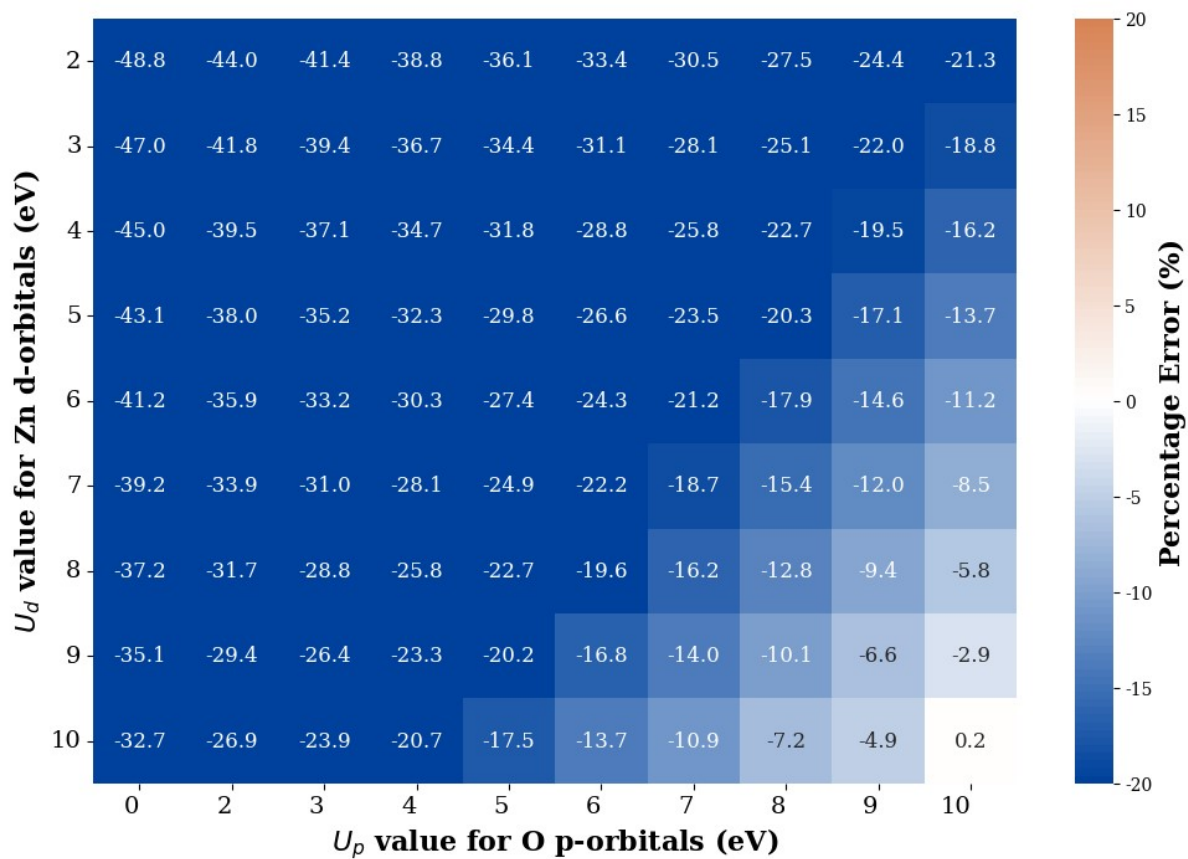

**Figure S47.** Heatmap of PBE predicted band gap for cubic  $\text{ZnO}_2$  as a function of the  $U_d$  and  $U_p$  parameters.

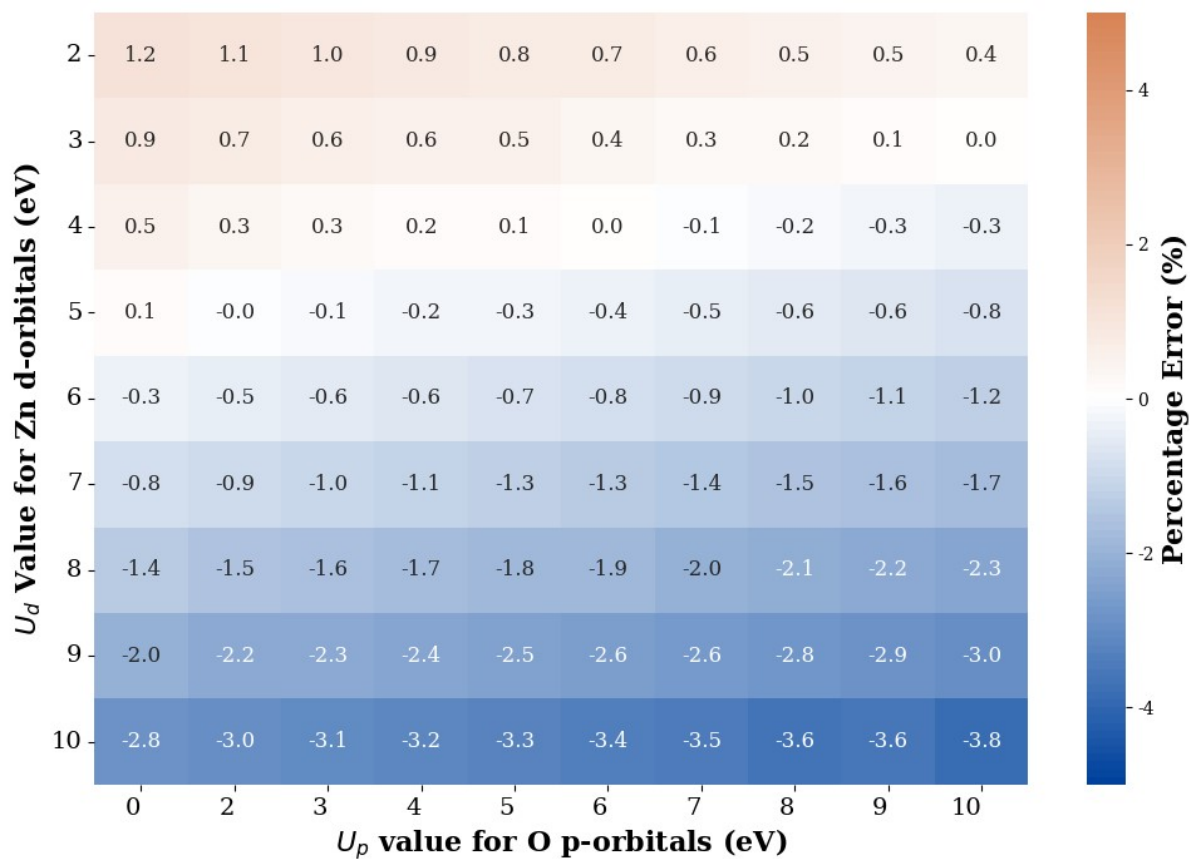

**Figure S48.** Heatmap of PBE predicted lattice constant ( $a = b = c$ ) for cubic  $\text{ZnO}_2$  as a function of the  $U_d$  and  $U_p$  parameters.

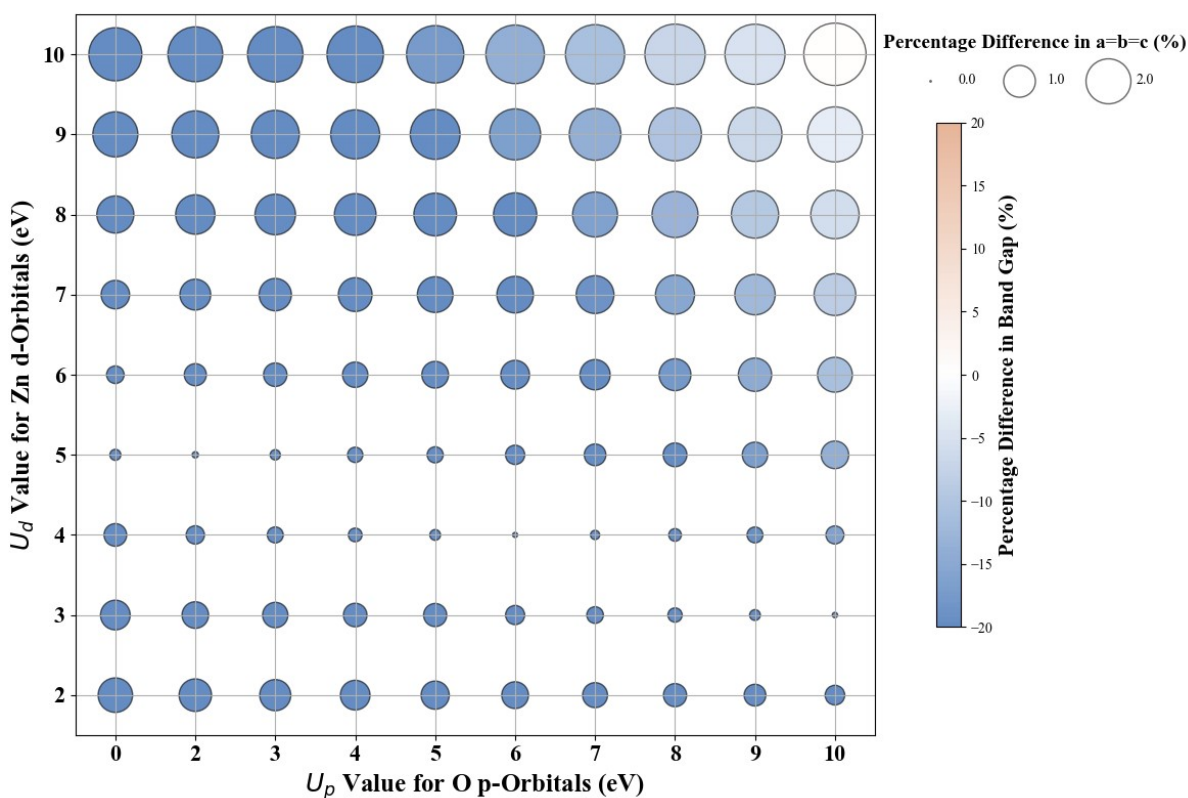



**Figure S49.** Effect of Hubbard U values on PBE band gap and lattice parameters of c-ZnO<sub>2</sub>.**Table S21.** Influence of U<sub>d</sub> and U<sub>p</sub> on cubic ZnO<sub>2</sub> DFT+U (PBE) predicted lattice parameters (a = b, c) and bandgap (E<sub>g</sub>)

| U <sub>d</sub> (eV) | U <sub>p</sub> (eV) | a = b = c (Å) | E <sub>g</sub> (eV) | % Deviation in<br>a = b = c | % Deviation in<br>E <sub>g</sub> |
|---------------------|---------------------|---------------|---------------------|-----------------------------|----------------------------------|
| 0                   | 0                   | 4.9573        | 2.128               | 1.77                        | -52.71                           |
| 2                   | 0                   | 4.9573        | 2.302               | 1.18                        | -48.84                           |
| 2                   | 2                   | 4.9222        | 2.521               | 1.05                        | -43.98                           |
| 2                   | 3                   | 4.9180        | 2.635               | 0.97                        | -41.44                           |
| 2                   | 4                   | 4.9137        | 2.753               | 0.88                        | -38.82                           |
| 2                   | 5                   | 4.9095        | 2.874               | 0.79                        | -36.13                           |
| 2                   | 6                   | 4.9058        | 2.999               | 0.71                        | -33.36                           |
| 2                   | 7                   | 4.9013        | 3.129               | 0.62                        | -30.47                           |
| 2                   | 8                   | 4.8970        | 3.262               | 0.53                        | -27.51                           |
| 2                   | 9                   | 4.8939        | 3.400               | 0.47                        | -24.44                           |
| 2                   | 10                  | 4.8898        | 3.542               | 0.39                        | -21.29                           |
| 3                   | 0                   | 4.9573        | 2.387               | 0.88                        | -46.96                           |
| 3                   | 2                   | 4.9053        | 2.621               | 0.70                        | -41.76                           |
| 3                   | 3                   | 4.9022        | 2.728               | 0.64                        | -39.38                           |
| 3                   | 4                   | 4.8979        | 2.849               | 0.55                        | -36.69                           |
| 3                   | 5                   | 4.8969        | 2.953               | 0.53                        | -34.38                           |
| 3                   | 6                   | 4.8889        | 3.102               | 0.37                        | -31.07                           |
| 3                   | 7                   | 4.8845        | 3.235               | 0.28                        | -28.11                           |
| 3                   | 8                   | 4.8810        | 3.370               | 0.20                        | -25.11                           |
| 3                   | 9                   | 4.8767        | 3.511               | 0.12                        | -21.98                           |
| 3                   | 10                  | 4.8724        | 3.655               | 0.03                        | -18.78                           |
| 4                   | 0                   | 4.9573        | 2.473               | 0.51                        | -45.04                           |
| 4                   | 2                   | 4.8874        | 2.721               | 0.34                        | -39.53                           |
| 4                   | 3                   | 4.8835        | 2.829               | 0.26                        | -37.13                           |
| 4                   | 4                   | 4.8802        | 2.940               | 0.19                        | -34.67                           |
| 4                   | 5                   | 4.8766        | 3.071               | 0.12                        | -31.76                           |
| 4                   | 6                   | 4.8722        | 3.203               | 0.03                        | -28.82                           |
| 4                   | 7                   | 4.8668        | 3.339               | -0.09                       | -25.80                           |
| 4                   | 8                   | 4.8632        | 3.477               | -0.16                       | -22.73                           |
| 4                   | 9                   | 4.8587        | 3.621               | -0.25                       | -19.53                           |
| 4                   | 10                  | 4.8552        | 3.769               | -0.32                       | -16.24                           |
| 5                   | 0                   | 4.9573        | 2.559               | 0.12                        | -43.13                           |
| 5                   | 2                   | 4.8690        | 2.792               | -0.04                       | -37.96                           |
| 5                   | 3                   | 4.8658        | 2.914               | -0.11                       | -35.24                           |
| 5                   | 4                   | 4.8596        | 3.045               | -0.23                       | -32.33                           |
| 5                   | 5                   | 4.8584        | 3.160               | -0.26                       | -29.78                           |
| 5                   | 6                   | 4.8529        | 3.304               | -0.37                       | -26.58                           |
| 5                   | 7                   | 4.8482        | 3.443               | -0.47                       | -23.49                           |
| 5                   | 8                   | 4.8436        | 3.585               | -0.56                       | -20.33                           |

|    |    |        |       |       |        |
|----|----|--------|-------|-------|--------|
| 5  | 9  | 4.8397 | 3.732 | -0.64 | -17.07 |
| 5  | 10 | 4.8341 | 3.883 | -0.76 | -13.71 |
| 6  | 0  | 4.9573 | 2.644 | -0.31 | -41.24 |
| 6  | 2  | 4.8473 | 2.884 | -0.49 | -35.91 |
| 6  | 3  | 4.8442 | 3.008 | -0.55 | -33.16 |
| 6  | 4  | 4.8398 | 3.137 | -0.64 | -30.29 |
| 6  | 5  | 4.8364 | 3.267 | -0.71 | -27.40 |
| 6  | 6  | 4.8308 | 3.407 | -0.83 | -24.29 |
| 6  | 7  | 4.8266 | 3.548 | -0.91 | -21.16 |
| 6  | 8  | 4.8218 | 3.694 | -1.01 | -17.91 |
| 6  | 9  | 4.8171 | 3.843 | -1.11 | -14.60 |
| 6  | 10 | 4.8122 | 3.997 | -1.21 | -11.18 |
| 7  | 0  | 4.9573 | 2.734 | -0.81 | -39.24 |
| 7  | 2  | 4.8248 | 2.976 | -0.95 | -33.87 |
| 7  | 3  | 4.8202 | 3.104 | -1.04 | -31.02 |
| 7  | 4  | 4.8156 | 3.236 | -1.14 | -28.09 |
| 7  | 5  | 4.8091 | 3.380 | -1.27 | -24.89 |
| 7  | 6  | 4.8060 | 3.501 | -1.33 | -22.20 |
| 7  | 7  | 4.8017 | 3.657 | -1.42 | -18.73 |
| 7  | 8  | 4.7970 | 3.806 | -1.52 | -15.42 |
| 7  | 9  | 4.7919 | 3.959 | -1.62 | -12.02 |
| 7  | 10 | 4.7869 | 4.116 | -1.73 | -8.53  |
| 8  | 0  | 4.9573 | 2.825 | -1.37 | -37.22 |
| 8  | 2  | 4.7958 | 3.075 | -1.54 | -31.67 |
| 8  | 3  | 4.7912 | 3.206 | -1.64 | -28.76 |
| 8  | 4  | 4.7867 | 3.340 | -1.73 | -25.78 |
| 8  | 5  | 4.7826 | 3.479 | -1.81 | -22.69 |
| 8  | 6  | 4.7803 | 3.618 | -1.86 | -19.60 |
| 8  | 7  | 4.7733 | 3.770 | -2.01 | -16.22 |
| 8  | 8  | 4.7684 | 3.922 | -2.11 | -12.84 |
| 8  | 9  | 4.7629 | 4.078 | -2.22 | -9.38  |
| 8  | 10 | 4.7581 | 4.239 | -2.32 | -5.80  |
| 9  | 0  | 4.9573 | 2.922 | -2.02 | -35.07 |
| 9  | 2  | 4.7638 | 3.178 | -2.20 | -29.38 |
| 9  | 3  | 4.7590 | 3.312 | -2.30 | -26.40 |
| 9  | 4  | 4.7545 | 3.450 | -2.39 | -23.33 |
| 9  | 5  | 4.7506 | 3.592 | -2.47 | -20.18 |
| 9  | 6  | 4.7451 | 3.746 | -2.58 | -16.76 |
| 9  | 7  | 4.7419 | 3.872 | -2.65 | -13.96 |
| 9  | 8  | 4.7357 | 4.045 | -2.78 | -10.11 |
| 9  | 9  | 4.7306 | 4.205 | -2.88 | -6.56  |
| 9  | 10 | 4.7252 | 4.370 | -2.99 | -2.89  |
| 10 | 0  | 4.9573 | 3.028 | -2.80 | -32.71 |
| 10 | 2  | 4.7254 | 3.290 | -2.99 | -26.89 |
| 10 | 3  | 4.7222 | 3.426 | -3.05 | -23.87 |
| 10 | 4  | 4.7164 | 3.568 | -3.17 | -20.71 |

|    |    |        |       |       |        |
|----|----|--------|-------|-------|--------|
| 10 | 5  | 4.7118 | 3.714 | -3.27 | -17.47 |
| 10 | 6  | 4.7055 | 3.885 | -3.40 | -13.67 |
| 10 | 7  | 4.7015 | 4.011 | -3.48 | -10.87 |
| 10 | 8  | 4.6952 | 4.178 | -3.61 | -7.16  |
| 10 | 9  | 4.6965 | 4.279 | -3.58 | -4.91  |
| 10 | 10 | 4.6837 | 4.511 | -3.84 | 0.24   |

**Table S22.** Influence of  $U_d$  and  $U_p$  on cubic  $ZnO_2$  DFT+U (PBE) predicted lattice parameters ( $a = b, c$ ) and bandgap ( $E_g$ ) [Extrapolation]

| $U_d$ (eV) | $U_p$ (eV) | $a = b = c$ (Å) | $E_g$ (eV) |
|------------|------------|-----------------|------------|
| 1          | 11         | 4.9195          | 3.520      |
| 2          | 15         | 4.8679          | 4.316      |
| 4          | 14         | 4.8381          | 4.410      |
| 7          | 15         | 4.7639          | 4.981      |
| 9          | 14         | 4.7048          | 5.081      |
| 10         | 14         | 4.6627          | 5.240      |
| 11         | 4          | 4.6677          | 3.703      |
| 12         | 2          | 4.6163          | 3.568      |
| 15         | 0          | 4.1032          | 5.670      |

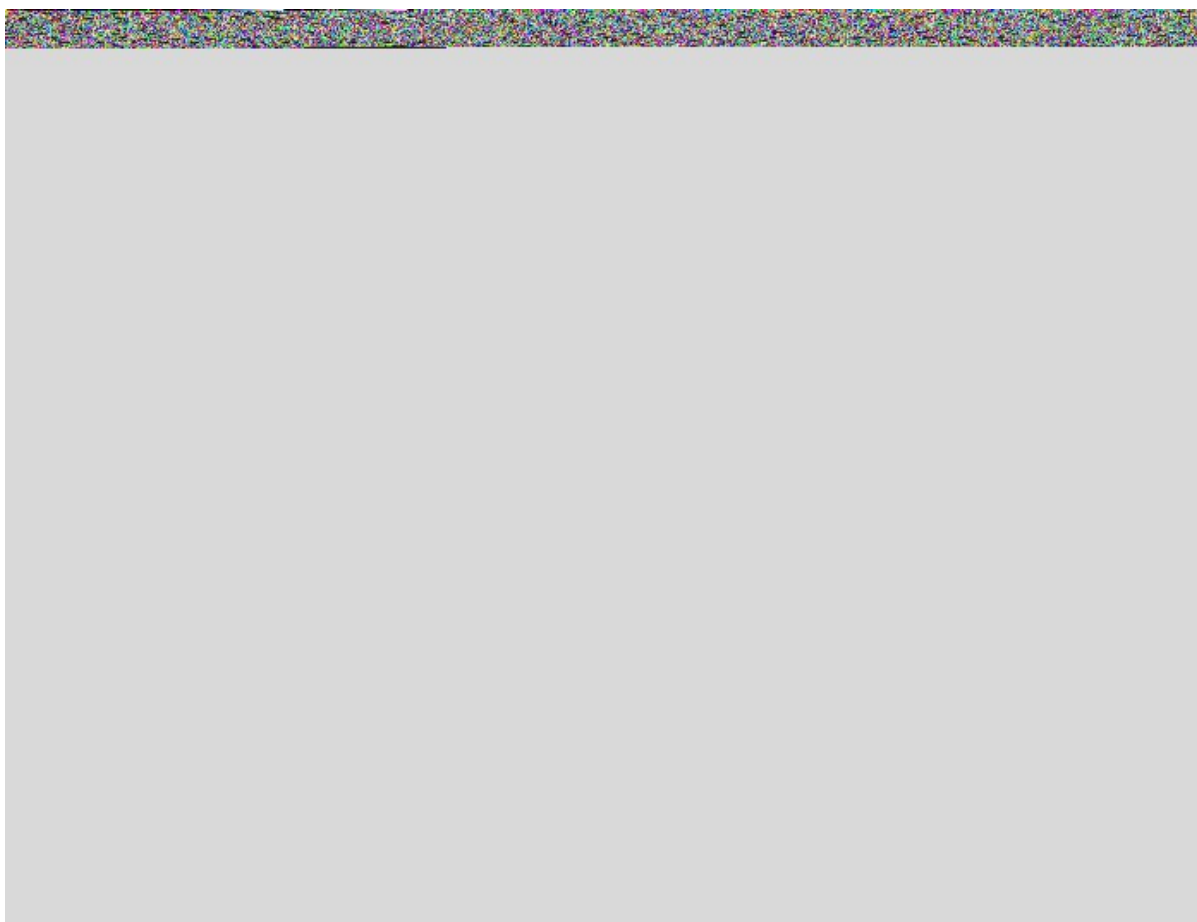

**Figure S50.** DOS for cubic ZnO<sub>2</sub> with PBE functional:  $U_p = 10$  eV,  $U_d = 10$  eV

**ZrO<sub>2</sub>:**

**rPBE:**

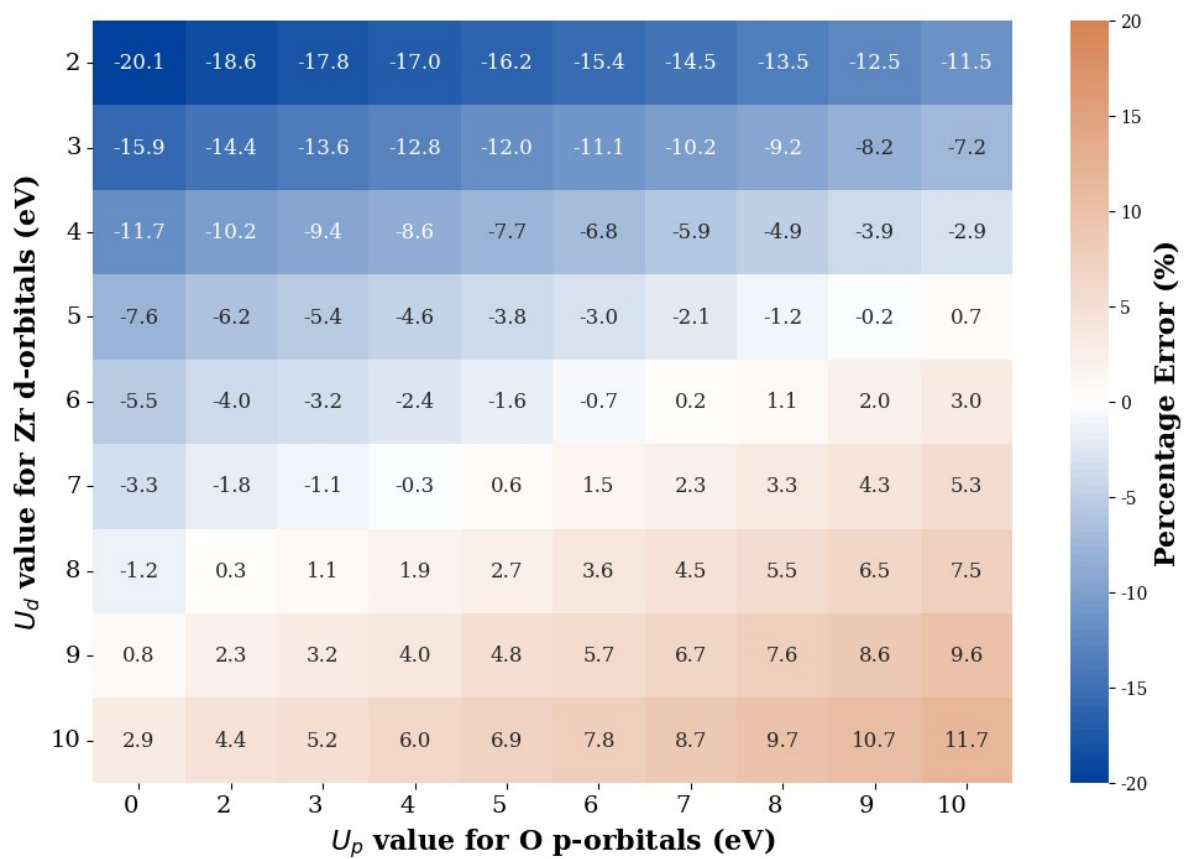

**Figure S51.** Heatmap of rPBE predicted band gap for cubic ZrO<sub>2</sub> as a function of the  $U_d$  and  $U_p$  parameters.

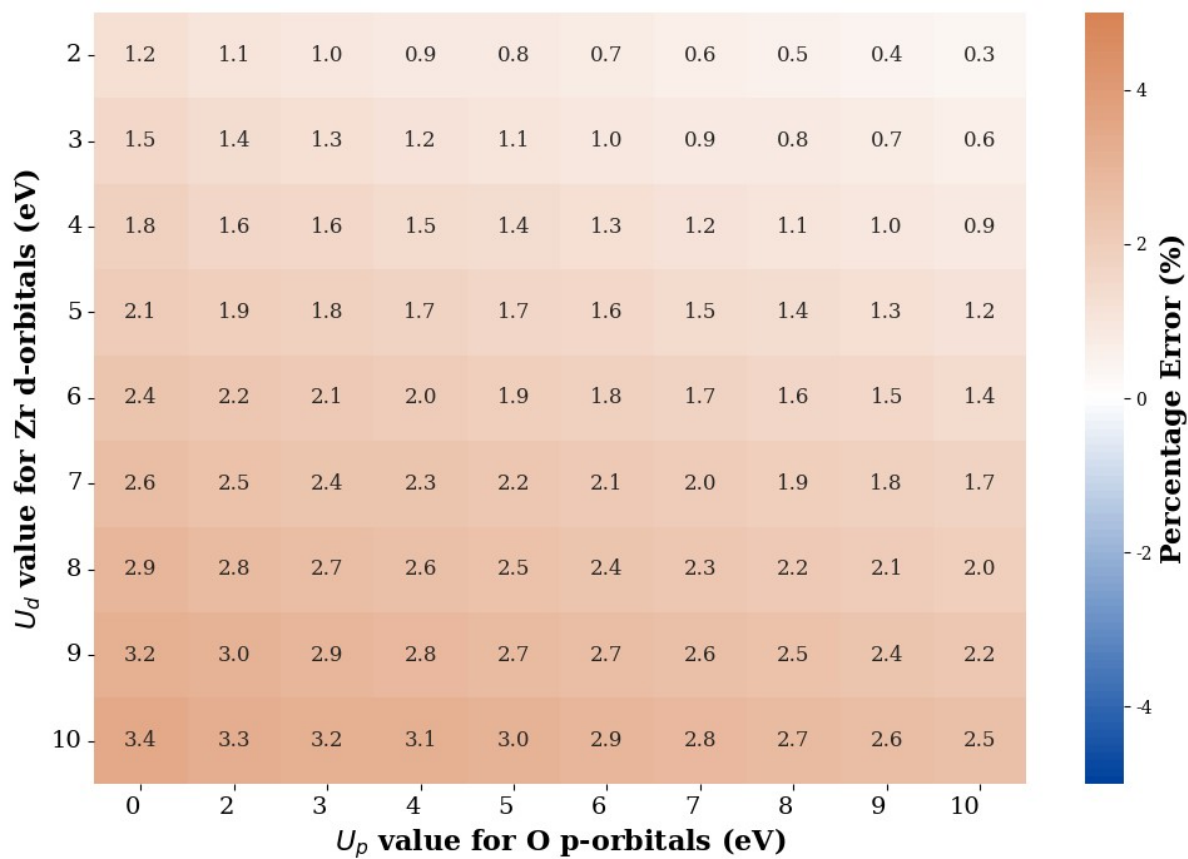

**Figure S52.** Heatmap of rPBE predicted lattice constant ( $a = b = c$ ) for cubic  $\text{ZrO}_2$  as a function of the  $U_d$  and  $U_p$  parameters.

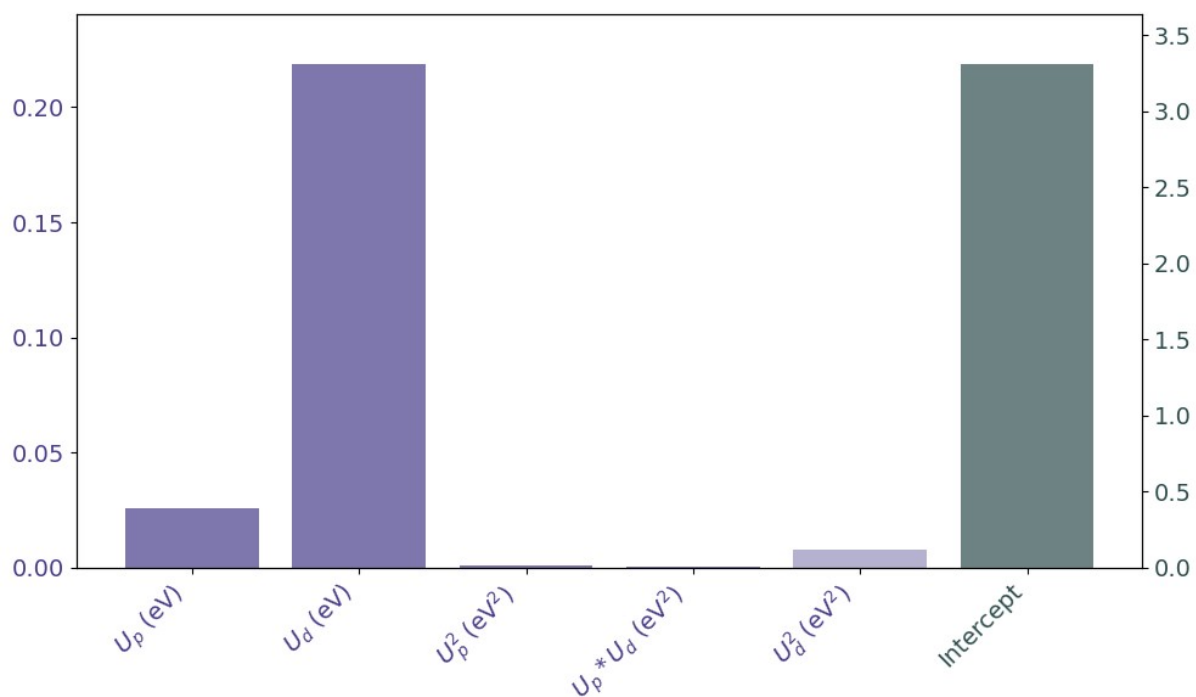

**Figure S53.** Feature importance of the PR model for predicting the rPBE band gap of c-ZrO<sub>2</sub>. Lighter shades indicate features with negative contributions.

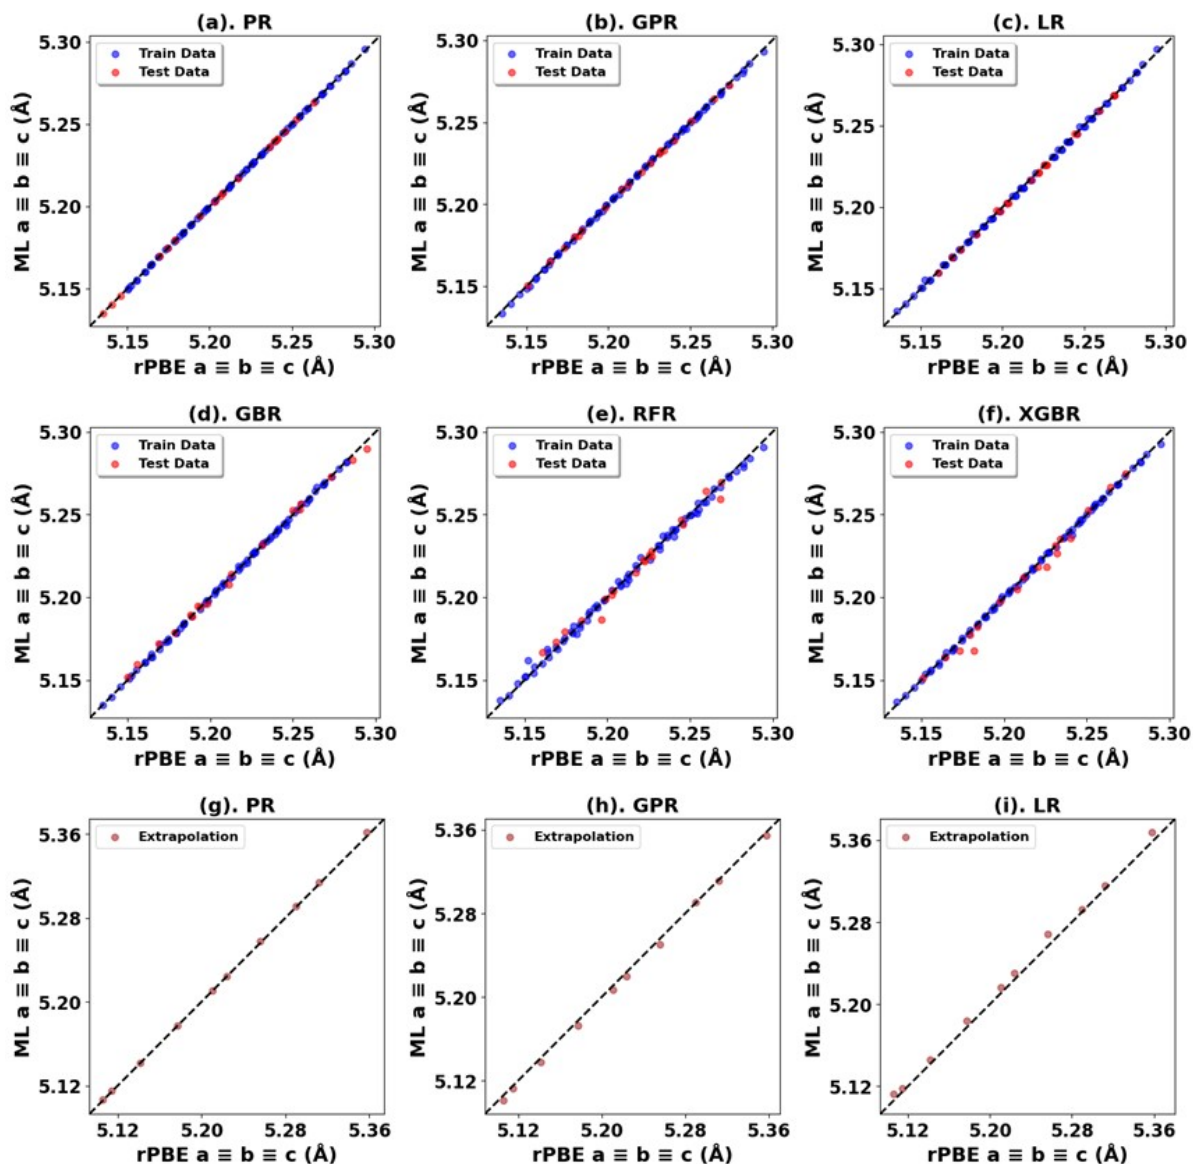

**Figure S54.** (a) - (f) Performance of models for rPBE lattice parameter ( $a = b = c$ ) prediction of c-ZrO<sub>2</sub> using the initial range of  $U_p$  from 0.00 eV to 10.00 eV and  $U_d$  from 2.00 eV to 10.00 eV. (g) - (i) Performance of top three models in extrapolation using  $U_p$  and  $U_d$  values beyond these initial ranges.

**Table S23.** Comparative performance of models for rPBE lattice constant ( $a = b = c$ ) prediction in cubic ZrO<sub>2</sub>.

| Oxide                     | Model | Initial Range            |             |            |                | Extrapolation            |             |            |                |
|---------------------------|-------|--------------------------|-------------|------------|----------------|--------------------------|-------------|------------|----------------|
|                           |       | MSE<br>(Å <sup>2</sup> ) | RMSE<br>(Å) | MAE<br>(Å) | R <sup>2</sup> | MSE<br>(Å <sup>2</sup> ) | RMSE<br>(Å) | MAE<br>(Å) | R <sup>2</sup> |
| Cubic<br>ZrO <sub>2</sub> | *PR   | 0.00                     | 0.00        | 0.00       | 1.00           | 0.00                     | 0.00        | 0.00       | 1.00           |
|                           | GPR   | 0.00                     | 0.00        | 0.00       | 1.00           | 0.00                     | 0.00        | 0.00       | 1.00           |
|                           | LR    | 0.00                     | 0.00        | 0.00       | 1.00           | 0.00                     | 0.01        | 0.01       | 0.99           |
|                           | GBR   | 0.00                     | 0.00        | 0.00       | 0.99           | 0.00                     | 0.03        | 0.03       | 0.87           |



|  |      |      |      |      |      |      |      |      |      |
|--|------|------|------|------|------|------|------|------|------|
|  | XGBR | 0.00 | 0.01 | 0.00 | 0.98 | 0.00 | 0.03 | 0.03 | 0.86 |
|  | RFR  | 0.00 | 0.01 | 0.00 | 0.98 | 0.00 | 0.03 | 0.03 | 0.85 |

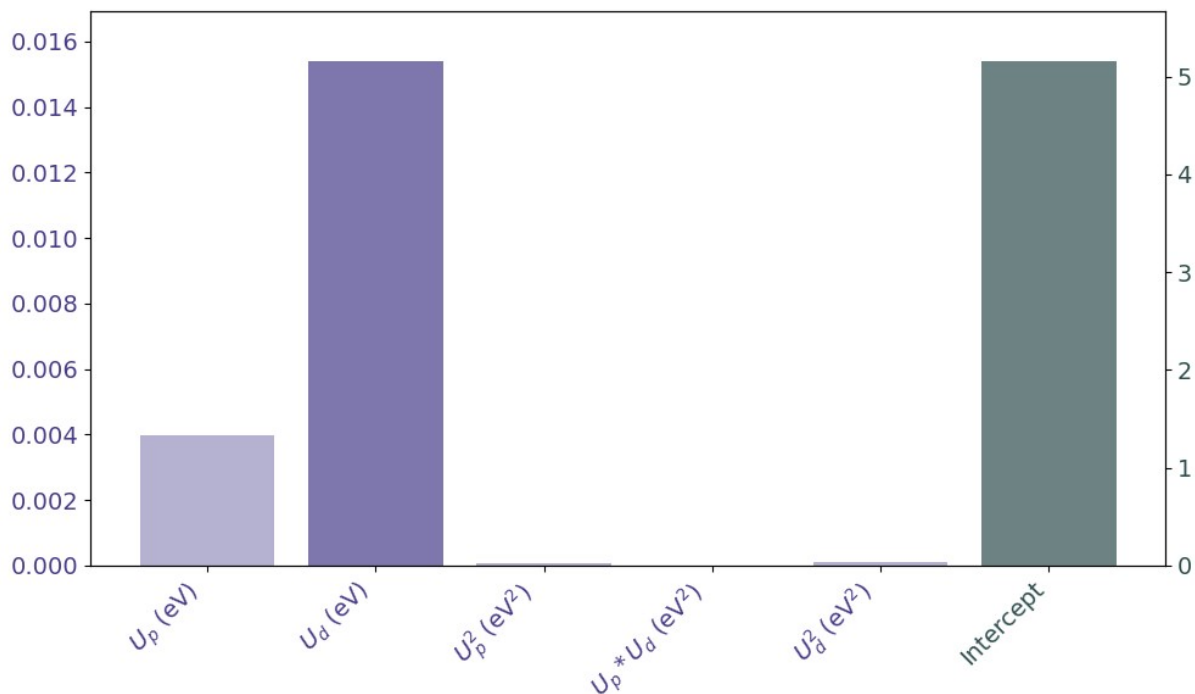

**Figure S55.** Feature importance of the PR model for predicting the rPBE lattice constant ( $a = b = c$ ) of c-ZrO<sub>2</sub>. Lighter shades indicate features with negative contributions.

**Table S24.** Influence of  $U_d$  and  $U_p$  on cubic ZrO<sub>2</sub> DFT+U (rPBE) predicted lattice parameters ( $a = b, c$ ) and bandgap ( $E_g$ )

| $U_d$ (eV) | $U_p$ (eV) | $a = b = c$ (Å) | $E_g$ (eV) | % Deviation in $a = b = c$ | % Deviation in $E_g$ |
|------------|------------|-----------------|------------|----------------------------|----------------------|
| 0          | 0          | 5.1523          | 3.295      | 0.65                       | -28.37               |
| 2          | 0          | 5.1817          | 3.675      | 1.23                       | -20.11               |
| 2          | 2          | 5.1733          | 3.743      | 1.06                       | -18.63               |
| 2          | 3          | 5.1689          | 3.779      | 0.98                       | -17.85               |
| 2          | 4          | 5.1644          | 3.816      | 0.89                       | -17.04               |
| 2          | 5          | 5.1607          | 3.853      | 0.82                       | -16.24               |
| 2          | 6          | 5.1558          | 3.893      | 0.72                       | -15.37               |
| 2          | 7          | 5.1508          | 3.935      | 0.62                       | -14.46               |
| 2          | 8          | 5.1457          | 3.979      | 0.52                       | -13.50               |
| 2          | 9          | 5.1405          | 4.024      | 0.42                       | -12.52               |
| 2          | 10         | 5.1351          | 4.071      | 0.32                       | -11.50               |
| 3          | 0          | 5.1965          | 3.867      | 1.52                       | -15.93               |
| 3          | 2          | 5.1881          | 3.937      | 1.35                       | -14.41               |

|   |    |        |       |      |        |
|---|----|--------|-------|------|--------|
| 3 | 3  | 5.1837 | 3.973 | 1.27 | -13.63 |
| 3 | 4  | 5.1792 | 4.011 | 1.18 | -12.80 |
| 3 | 5  | 5.1745 | 4.050 | 1.09 | -11.96 |
| 3 | 6  | 5.1698 | 4.091 | 0.99 | -11.07 |
| 3 | 7  | 5.1649 | 4.133 | 0.90 | -10.15 |
| 3 | 8  | 5.1608 | 4.175 | 0.82 | -9.24  |
| 3 | 9  | 5.1555 | 4.221 | 0.71 | -8.24  |
| 3 | 10 | 5.1501 | 4.268 | 0.61 | -7.22  |
| 4 | 0  | 5.2113 | 4.060 | 1.80 | -11.74 |
| 4 | 2  | 5.2028 | 4.131 | 1.64 | -10.20 |
| 4 | 3  | 5.1983 | 4.168 | 1.55 | -9.39  |
| 4 | 4  | 5.1938 | 4.206 | 1.46 | -8.57  |
| 4 | 5  | 5.1891 | 4.246 | 1.37 | -7.70  |
| 4 | 6  | 5.1844 | 4.287 | 1.28 | -6.80  |
| 4 | 7  | 5.1794 | 4.330 | 1.18 | -5.87  |
| 4 | 8  | 5.1744 | 4.374 | 1.08 | -4.91  |
| 4 | 9  | 5.1692 | 4.420 | 0.98 | -3.91  |
| 4 | 10 | 5.1639 | 4.468 | 0.88 | -2.87  |
| 5 | 0  | 5.2258 | 4.249 | 2.09 | -7.63  |
| 5 | 2  | 5.2172 | 4.315 | 1.92 | -6.20  |
| 5 | 3  | 5.2128 | 4.350 | 1.83 | -5.43  |
| 5 | 4  | 5.2082 | 4.387 | 1.75 | -4.63  |
| 5 | 5  | 5.2036 | 4.424 | 1.65 | -3.83  |
| 5 | 6  | 5.1987 | 4.463 | 1.56 | -2.98  |
| 5 | 7  | 5.1939 | 4.503 | 1.47 | -2.11  |
| 5 | 8  | 5.1888 | 4.545 | 1.36 | -1.20  |
| 5 | 9  | 5.1835 | 4.589 | 1.26 | -0.24  |
| 5 | 10 | 5.1782 | 4.634 | 1.16 | 0.74   |
| 6 | 0  | 5.2402 | 4.349 | 2.37 | -5.46  |
| 6 | 2  | 5.2316 | 4.416 | 2.20 | -4.00  |
| 6 | 3  | 5.2271 | 4.451 | 2.11 | -3.24  |
| 6 | 4  | 5.2225 | 4.488 | 2.02 | -2.43  |
| 6 | 5  | 5.2178 | 4.526 | 1.93 | -1.61  |
| 6 | 6  | 5.2130 | 4.566 | 1.84 | -0.74  |
| 6 | 7  | 5.2080 | 4.607 | 1.74 | 0.15   |
| 6 | 8  | 5.2030 | 4.649 | 1.64 | 1.07   |
| 6 | 9  | 5.1977 | 4.693 | 1.54 | 2.02   |
| 6 | 10 | 5.1924 | 4.739 | 1.44 | 3.02   |
| 7 | 0  | 5.2544 | 4.447 | 2.65 | -3.33  |
| 7 | 2  | 5.2457 | 4.515 | 2.48 | -1.85  |
| 7 | 3  | 5.2413 | 4.551 | 2.39 | -1.07  |
| 7 | 4  | 5.2367 | 4.588 | 2.30 | -0.26  |
| 7 | 5  | 5.2319 | 4.627 | 2.21 | 0.59   |
| 7 | 6  | 5.2271 | 4.667 | 2.11 | 1.46   |
| 7 | 7  | 5.2221 | 4.708 | 2.02 | 2.35   |
| 7 | 8  | 5.2171 | 4.751 | 1.92 | 3.28   |

|    |    |        |       |      |       |
|----|----|--------|-------|------|-------|
| 7  | 9  | 5.2118 | 4.796 | 1.81 | 4.26  |
| 7  | 10 | 5.2064 | 4.842 | 1.71 | 5.26  |
| 8  | 0  | 5.2684 | 4.544 | 2.92 | -1.22 |
| 8  | 2  | 5.2597 | 4.613 | 2.75 | 0.28  |
| 8  | 3  | 5.2552 | 4.649 | 2.66 | 1.07  |
| 8  | 4  | 5.2506 | 4.687 | 2.57 | 1.89  |
| 8  | 5  | 5.2459 | 4.726 | 2.48 | 2.74  |
| 8  | 6  | 5.2410 | 4.766 | 2.39 | 3.61  |
| 8  | 7  | 5.2360 | 4.808 | 2.29 | 4.52  |
| 8  | 8  | 5.2309 | 4.851 | 2.19 | 5.46  |
| 8  | 9  | 5.2256 | 4.897 | 2.08 | 6.46  |
| 8  | 10 | 5.2202 | 4.943 | 1.98 | 7.46  |
| 9  | 0  | 5.2822 | 4.638 | 3.19 | 0.83  |
| 9  | 2  | 5.2735 | 4.708 | 3.02 | 2.35  |
| 9  | 3  | 5.2690 | 4.745 | 2.93 | 3.15  |
| 9  | 4  | 5.2644 | 4.783 | 2.84 | 3.98  |
| 9  | 5  | 5.2596 | 4.823 | 2.75 | 4.85  |
| 9  | 6  | 5.2547 | 4.863 | 2.65 | 5.72  |
| 9  | 7  | 5.2498 | 4.906 | 2.56 | 6.65  |
| 9  | 8  | 5.2446 | 4.950 | 2.45 | 7.61  |
| 9  | 9  | 5.2393 | 4.995 | 2.35 | 8.59  |
| 9  | 10 | 5.2338 | 5.043 | 2.25 | 9.63  |
| 10 | 0  | 5.2946 | 4.733 | 3.43 | 2.89  |
| 10 | 2  | 5.2860 | 4.804 | 3.26 | 4.43  |
| 10 | 3  | 5.2826 | 4.839 | 3.20 | 5.20  |
| 10 | 4  | 5.2779 | 4.878 | 3.11 | 6.04  |
| 10 | 5  | 5.2731 | 4.917 | 3.01 | 6.89  |
| 10 | 6  | 5.2682 | 4.959 | 2.92 | 7.80  |
| 10 | 7  | 5.2632 | 5.002 | 2.82 | 8.74  |
| 10 | 8  | 5.2580 | 5.046 | 2.72 | 9.70  |
| 10 | 9  | 5.2527 | 5.092 | 2.61 | 10.70 |
| 10 | 10 | 5.2472 | 5.140 | 2.51 | 11.74 |

---

**Table S25.** Influence of  $U_d$  and  $U_p$  on cubic  $ZrO_2$  DFT+U (rPBE) predicted lattice parameters ( $a = b, c$ ) and bandgap ( $E_g$ ) [Extrapolation]

| $U_d$ (eV) | $U_p$ (eV) | $a = b = c$ (Å) | $E_g$ (eV) |
|------------|------------|-----------------|------------|
| 1          | 11         | 5.1146          | 3.922      |
| 2          | 15         | 5.1060          | 4.336      |
| 4          | 14         | 5.1415          | 4.680      |
| 7          | 15         | 5.1771          | 5.103      |
| 9          | 14         | 5.2104          | 5.252      |
| 10         | 14         | 5.2238          | 5.352      |
| 11         | 4          | 5.2901          | 4.972      |
| 12         | 2          | 5.3120          | 4.985      |
| 13         | 15         | 5.2560          | 5.698      |
| 15         | 0          | 5.3577          | 4.824      |

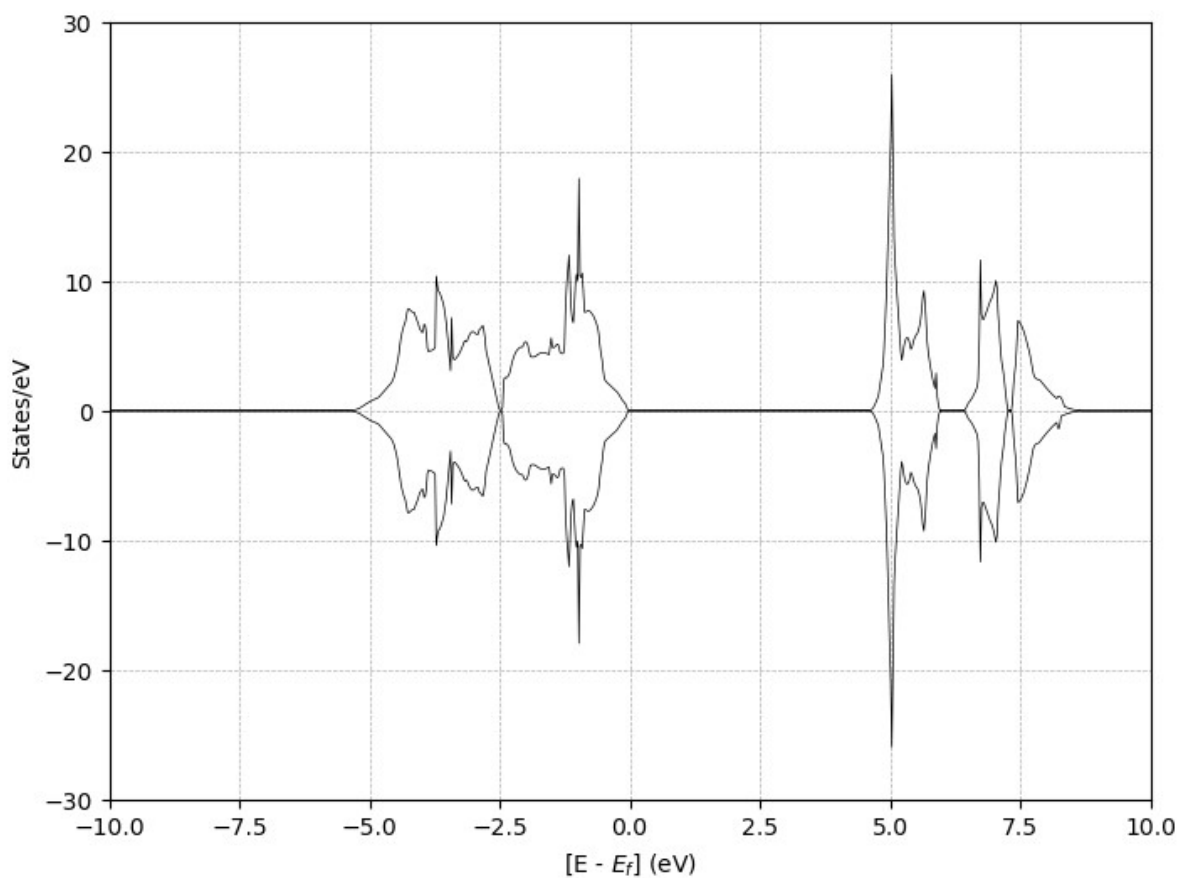

**Figure S56.** DOS for cubic  $ZrO_2$  with rPBE functional:  $U_p = 9$  eV,  $U_d = 5$  eV

PBE:

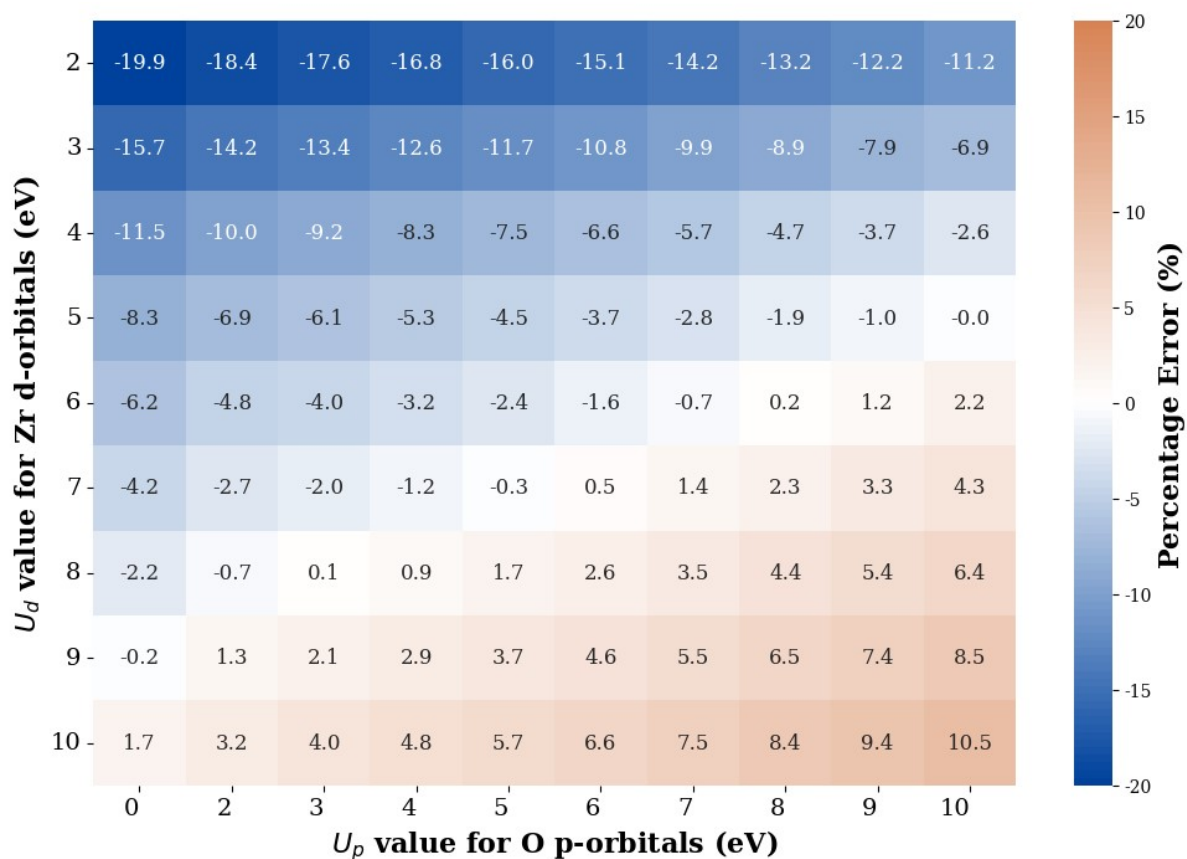

**Figure S57.** Heatmap of PBE predicted band gap for cubic ZrO<sub>2</sub> as a function of the  $U_d$  and  $U_p$  parameters.

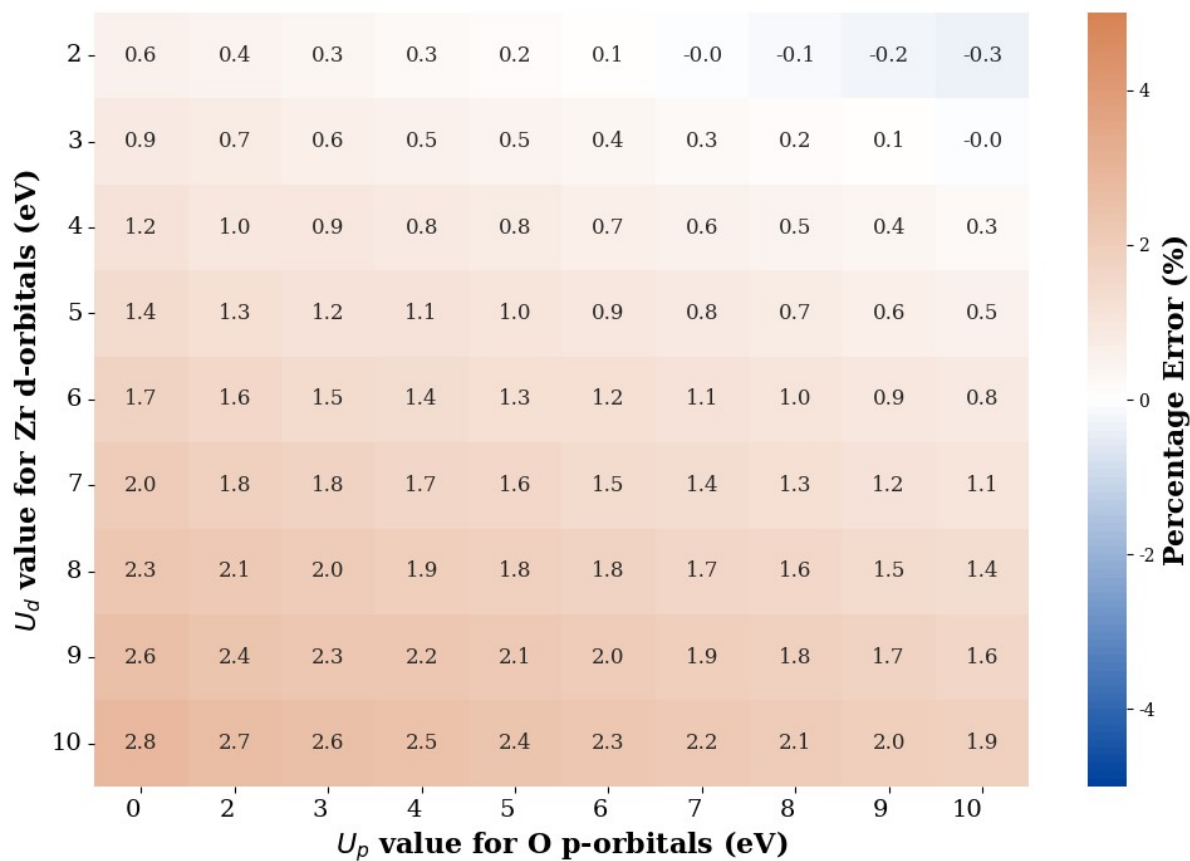

**Figure S58.** Heatmap of PBE predicted lattice constant ( $a = b = c$ ) for cubic  $\text{ZrO}_2$  as a function of the  $U_d$  and  $U_p$  parameters.

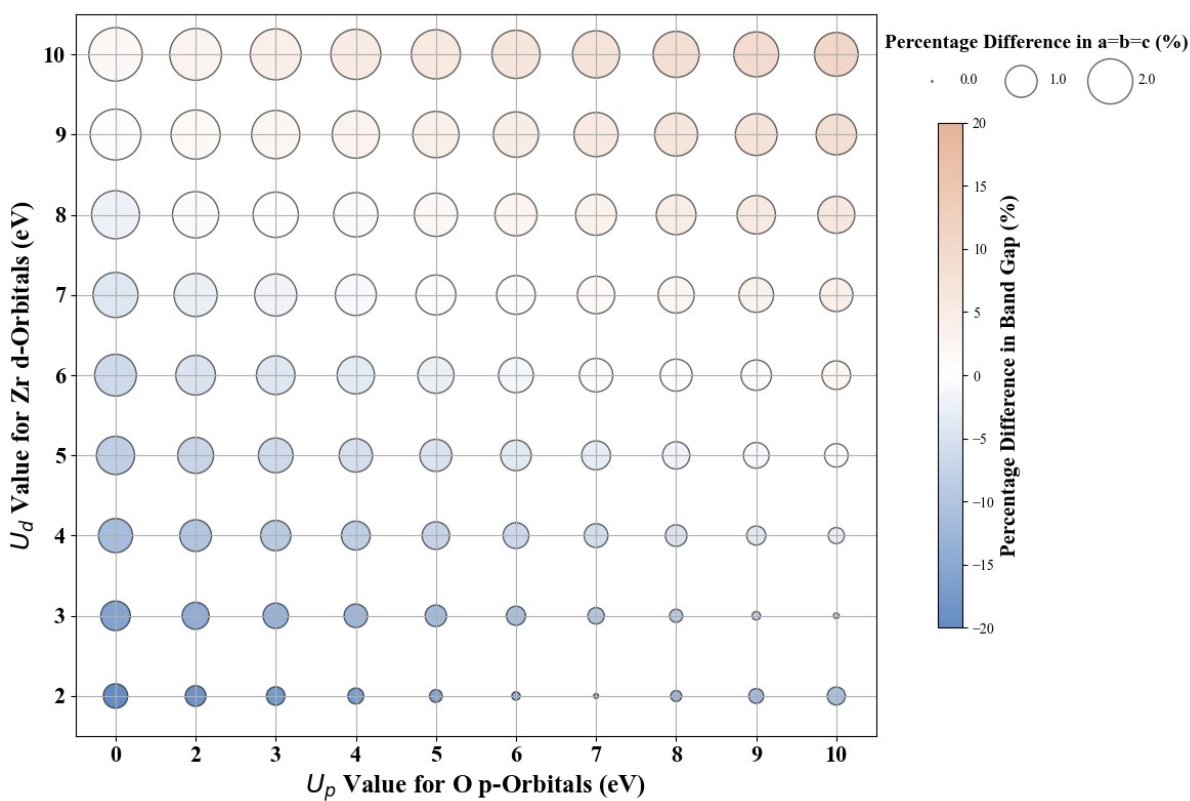

**Figure S59.** Effect of Hubbard U values on PBE band gap and lattice parameters of c-ZrO<sub>2</sub>.**Table S26.** Influence of U<sub>d</sub> and U<sub>p</sub> on cubic ZrO<sub>2</sub> DFT+U (PBE) predicted lattice parameters (a = b, c) and bandgap (E<sub>g</sub>)

| U <sub>d</sub> (eV) | U <sub>p</sub> (eV) | a = b = c (Å) | E <sub>g</sub> (eV) | % Deviation in a =<br>b = c | % Deviation in E <sub>g</sub> |
|---------------------|---------------------|---------------|---------------------|-----------------------------|-------------------------------|
| 0                   | 0                   | 5.1184        | 3.307               | -0.01                       | -28.11                        |
| 2                   | 0                   | 5.1491        | 3.683               | 0.59                        | -19.93                        |
| 2                   | 2                   | 5.1407        | 3.753               | 0.43                        | -18.41                        |
| 2                   | 3                   | 5.1363        | 3.789               | 0.34                        | -17.63                        |
| 2                   | 4                   | 5.1318        | 3.827               | 0.25                        | -16.80                        |
| 2                   | 5                   | 5.1272        | 3.866               | 0.16                        | -15.96                        |
| 2                   | 6                   | 5.1225        | 3.907               | 0.07                        | -15.07                        |
| 2                   | 7                   | 5.1177        | 3.949               | -0.02                       | -14.15                        |
| 2                   | 8                   | 5.1127        | 3.993               | -0.12                       | -13.20                        |
| 2                   | 9                   | 5.1076        | 4.039               | -0.22                       | -12.20                        |
| 2                   | 10                  | 5.1024        | 4.086               | -0.32                       | -11.17                        |
| 3                   | 0                   | 5.1633        | 3.877               | 0.87                        | -15.72                        |
| 3                   | 2                   | 5.1559        | 3.945               | 0.72                        | -14.24                        |
| 3                   | 3                   | 5.1515        | 3.982               | 0.64                        | -13.43                        |
| 3                   | 4                   | 5.1470        | 4.020               | 0.55                        | -12.61                        |
| 3                   | 5                   | 5.1423        | 4.060               | 0.46                        | -11.74                        |
| 3                   | 6                   | 5.1375        | 4.101               | 0.36                        | -10.85                        |
| 3                   | 7                   | 5.1327        | 4.144               | 0.27                        | -9.91                         |
| 3                   | 8                   | 5.1276        | 4.189               | 0.17                        | -8.93                         |
| 3                   | 9                   | 5.1225        | 4.235               | 0.07                        | -7.93                         |
| 3                   | 10                  | 5.1172        | 4.283               | -0.03                       | -6.89                         |
| 4                   | 0                   | 5.1781        | 4.069               | 1.16                        | -11.54                        |
| 4                   | 2                   | 5.1698        | 4.140               | 0.99                        | -10.00                        |
| 4                   | 3                   | 5.1654        | 4.178               | 0.91                        | -9.17                         |
| 4                   | 4                   | 5.1610        | 4.216               | 0.82                        | -8.35                         |
| 4                   | 5                   | 5.1574        | 4.254               | 0.75                        | -7.52                         |
| 4                   | 6                   | 5.1525        | 4.296               | 0.66                        | -6.61                         |
| 4                   | 7                   | 5.1476        | 4.340               | 0.56                        | -5.65                         |
| 4                   | 8                   | 5.1426        | 4.385               | 0.46                        | -4.67                         |
| 4                   | 9                   | 5.1374        | 4.432               | 0.36                        | -3.65                         |
| 4                   | 10                  | 5.1320        | 4.480               | 0.26                        | -2.61                         |
| 5                   | 0                   | 5.1927        | 4.218               | 1.44                        | -8.30                         |
| 5                   | 2                   | 5.1843        | 4.284               | 1.28                        | -6.87                         |
| 5                   | 3                   | 5.1800        | 4.319               | 1.19                        | -6.11                         |
| 5                   | 4                   | 5.1755        | 4.355               | 1.11                        | -5.33                         |
| 5                   | 5                   | 5.1709        | 4.392               | 1.02                        | -4.52                         |
| 5                   | 6                   | 5.1662        | 4.431               | 0.92                        | -3.67                         |
| 5                   | 7                   | 5.1614        | 4.471               | 0.83                        | -2.80                         |
| 5                   | 8                   | 5.1564        | 4.513               | 0.73                        | -1.89                         |

|    |    |        |       |      |       |
|----|----|--------|-------|------|-------|
| 5  | 9  | 5.1522 | 4.554 | 0.65 | -1.00 |
| 5  | 10 | 5.1468 | 4.599 | 0.54 | -0.02 |
| 6  | 0  | 5.2072 | 4.313 | 1.73 | -6.24 |
| 6  | 2  | 5.1988 | 4.380 | 1.56 | -4.78 |
| 6  | 3  | 5.1944 | 4.415 | 1.47 | -4.02 |
| 6  | 4  | 5.1899 | 4.452 | 1.39 | -3.22 |
| 6  | 5  | 5.1853 | 4.489 | 1.30 | -2.41 |
| 6  | 6  | 5.1806 | 4.528 | 1.21 | -1.57 |
| 6  | 7  | 5.1758 | 4.569 | 1.11 | -0.67 |
| 6  | 8  | 5.1709 | 4.611 | 1.02 | 0.24  |
| 6  | 9  | 5.1656 | 4.655 | 0.91 | 1.20  |
| 6  | 10 | 5.1604 | 4.700 | 0.81 | 2.17  |
| 7  | 0  | 5.2215 | 4.407 | 2.00 | -4.20 |
| 7  | 2  | 5.2130 | 4.475 | 1.84 | -2.72 |
| 7  | 3  | 5.2086 | 4.510 | 1.75 | -1.96 |
| 7  | 4  | 5.2041 | 4.547 | 1.66 | -1.15 |
| 7  | 5  | 5.1995 | 4.585 | 1.57 | -0.33 |
| 7  | 6  | 5.1947 | 4.625 | 1.48 | 0.54  |
| 7  | 7  | 5.1899 | 4.666 | 1.39 | 1.43  |
| 7  | 8  | 5.1850 | 4.708 | 1.29 | 2.35  |
| 7  | 9  | 5.1797 | 4.752 | 1.19 | 3.30  |
| 7  | 10 | 5.1745 | 4.798 | 1.09 | 4.30  |
| 8  | 0  | 5.2356 | 4.499 | 2.28 | -2.20 |
| 8  | 2  | 5.2272 | 4.567 | 2.11 | -0.72 |
| 8  | 3  | 5.2227 | 4.603 | 2.03 | 0.07  |
| 8  | 4  | 5.2182 | 4.641 | 1.94 | 0.89  |
| 8  | 5  | 5.2135 | 4.679 | 1.85 | 1.72  |
| 8  | 6  | 5.2087 | 4.719 | 1.76 | 2.59  |
| 8  | 7  | 5.2038 | 4.760 | 1.66 | 3.48  |
| 8  | 8  | 5.1988 | 4.803 | 1.56 | 4.41  |
| 8  | 9  | 5.1937 | 4.848 | 1.46 | 5.39  |
| 8  | 10 | 5.1883 | 4.894 | 1.36 | 6.39  |
| 9  | 0  | 5.2495 | 4.589 | 2.55 | -0.24 |
| 9  | 2  | 5.2410 | 4.658 | 2.39 | 1.26  |
| 9  | 3  | 5.2365 | 4.695 | 2.30 | 2.07  |
| 9  | 4  | 5.2320 | 4.732 | 2.21 | 2.87  |
| 9  | 5  | 5.2273 | 4.771 | 2.12 | 3.72  |
| 9  | 6  | 5.2225 | 4.812 | 2.02 | 4.61  |
| 9  | 7  | 5.2176 | 4.853 | 1.93 | 5.50  |
| 9  | 8  | 5.2126 | 4.897 | 1.83 | 6.46  |
| 9  | 9  | 5.2074 | 4.942 | 1.73 | 7.43  |
| 9  | 10 | 5.2021 | 4.989 | 1.62 | 8.46  |
| 10 | 0  | 5.2632 | 4.677 | 2.82 | 1.67  |
| 10 | 2  | 5.2547 | 4.747 | 2.65 | 3.20  |
| 10 | 3  | 5.2502 | 4.784 | 2.57 | 4.00  |
| 10 | 4  | 5.2457 | 4.822 | 2.48 | 4.83  |



|    |    |        |       |      |       |
|----|----|--------|-------|------|-------|
| 10 | 5  | 5.2410 | 4.861 | 2.38 | 5.67  |
| 10 | 6  | 5.2362 | 4.902 | 2.29 | 6.57  |
| 10 | 7  | 5.2312 | 4.944 | 2.19 | 7.48  |
| 10 | 8  | 5.2262 | 4.988 | 2.10 | 8.43  |
| 10 | 9  | 5.2210 | 5.034 | 1.99 | 9.43  |
| 10 | 10 | 5.2156 | 5.081 | 1.89 | 10.46 |

**Table S27.** Influence of  $U_d$  and  $U_p$  on cubic  $ZrO_2$  DFT+U (PBE) predicted lattice parameters ( $a = b, c$ ) and bandgap ( $E_g$ ) [Extrapolation]

| $U_d$ (eV) | $U_p$ (eV) | $a = b = c$ (Å) | $E_g$ (eV) |
|------------|------------|-----------------|------------|
| 1          | 11         | 5.0822          | 3.938      |
| 2          | 15         | 5.0742          | 4.353      |
| 4          | 14         | 5.1094          | 4.696      |
| 7          | 15         | 5.1464          | 5.054      |
| 9          | 14         | 5.1795          | 5.194      |
| 10         | 14         | 5.1927          | 5.289      |
| 11         | 4          | 5.2591          | 4.910      |
| 12         | 2          | 5.2803          | 4.921      |
| 13         | 15         | 5.2254          | 5.618      |
| 15         | 0          | 5.3264          | 4.797      |

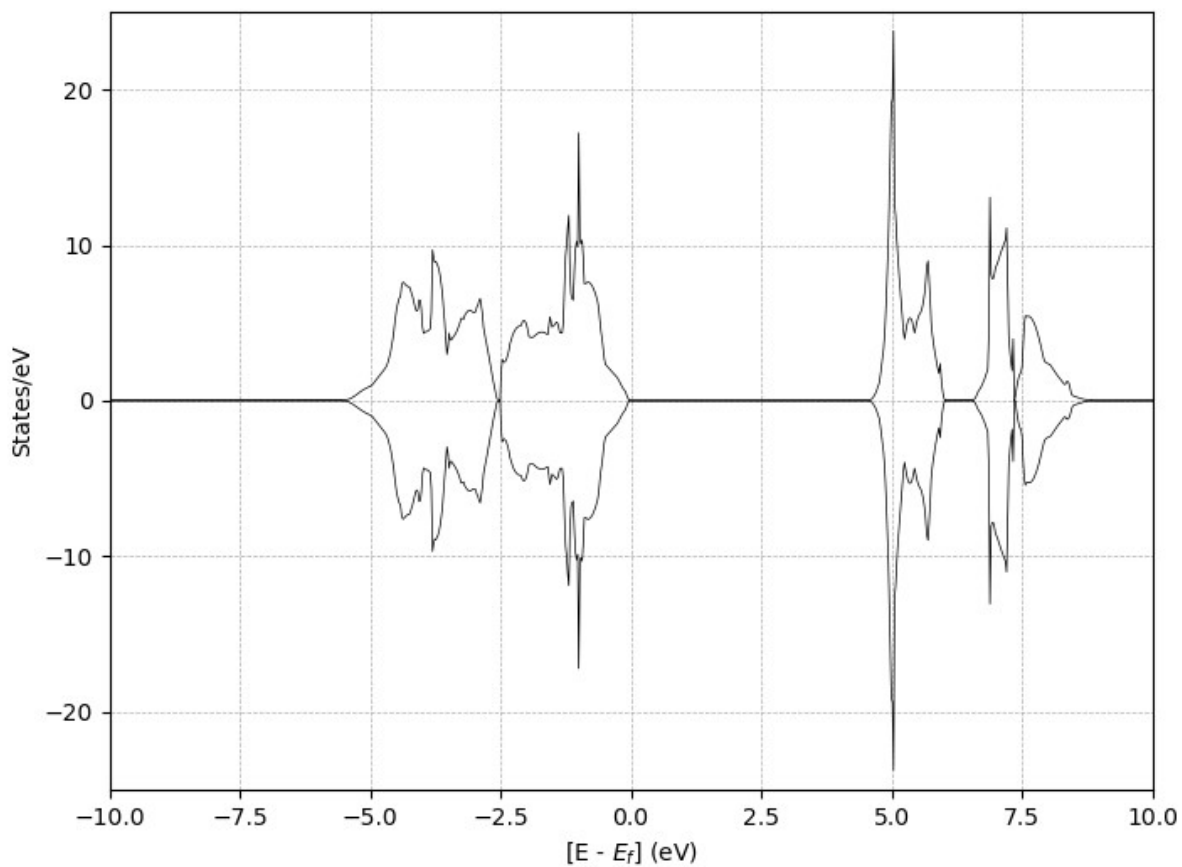

**Figure S60.** DOS for cubic  $\text{ZrO}_2$  with PBE functional:  $U_p = 9$  eV,  $U_d = 5$  eV

**CeO<sub>2</sub>:**

**rPBE:**

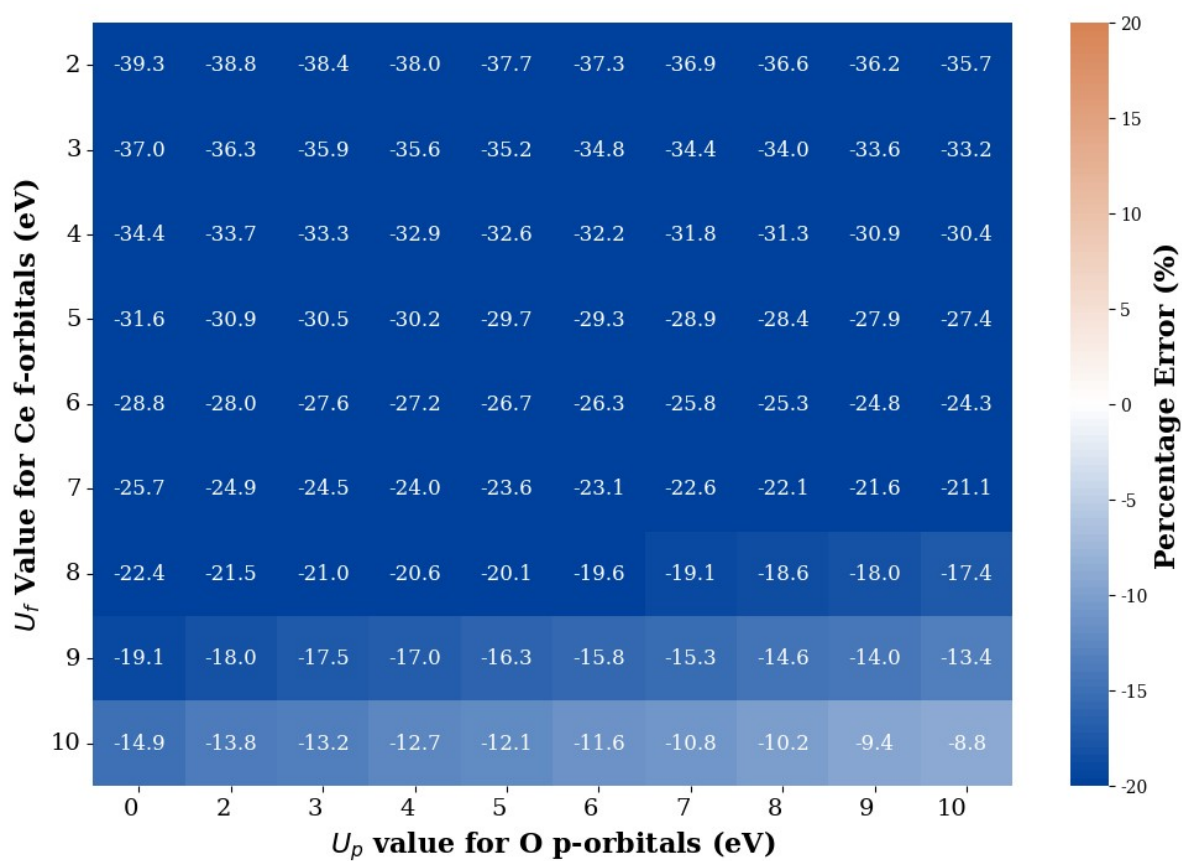

**Figure S61.** Heatmap of rPBE predicted band gap for cubic CeO<sub>2</sub> as a function of the  $U_f$  and  $U_p$  parameters.

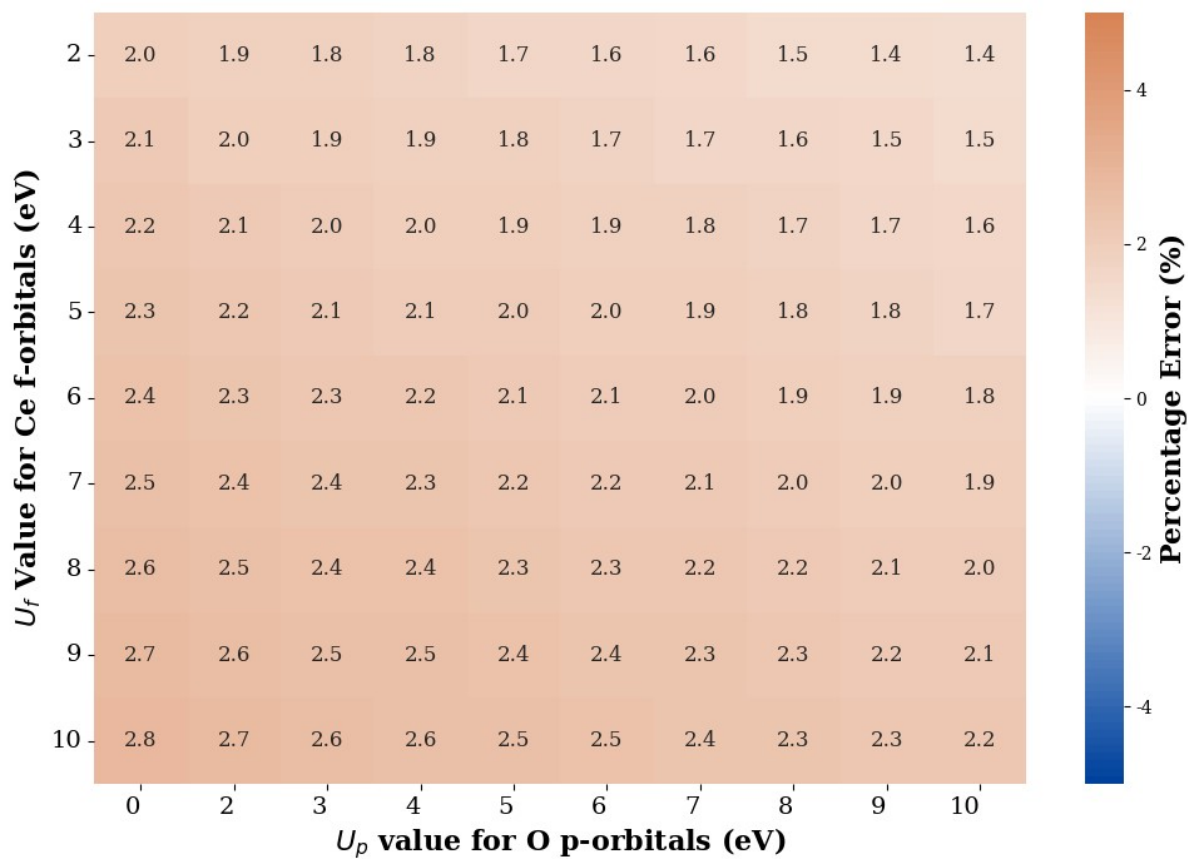

**Figure S62.** Heatmap of rPBE predicted lattice constant ( $a = b = c$ ) for cubic  $\text{CeO}_2$  as a function of the  $U_f$  and  $U_p$  parameters.

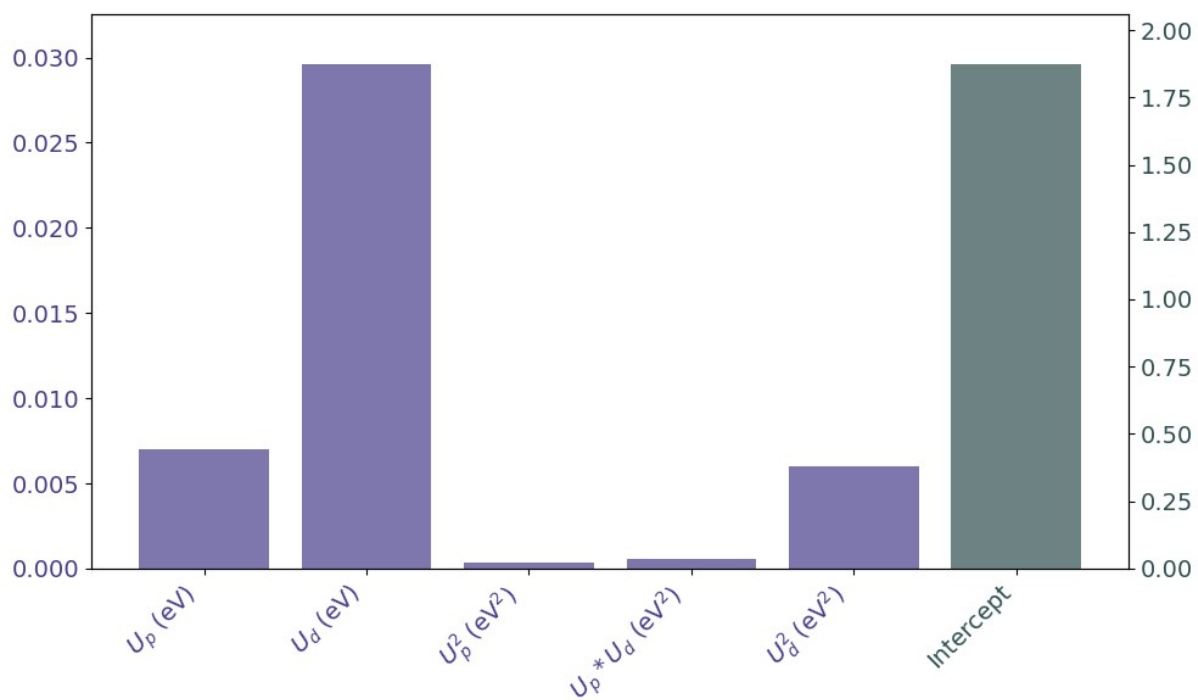

**Figure S63.** Feature importance of the PR model for predicting the rPBE band gap of c-CeO<sub>2</sub>.

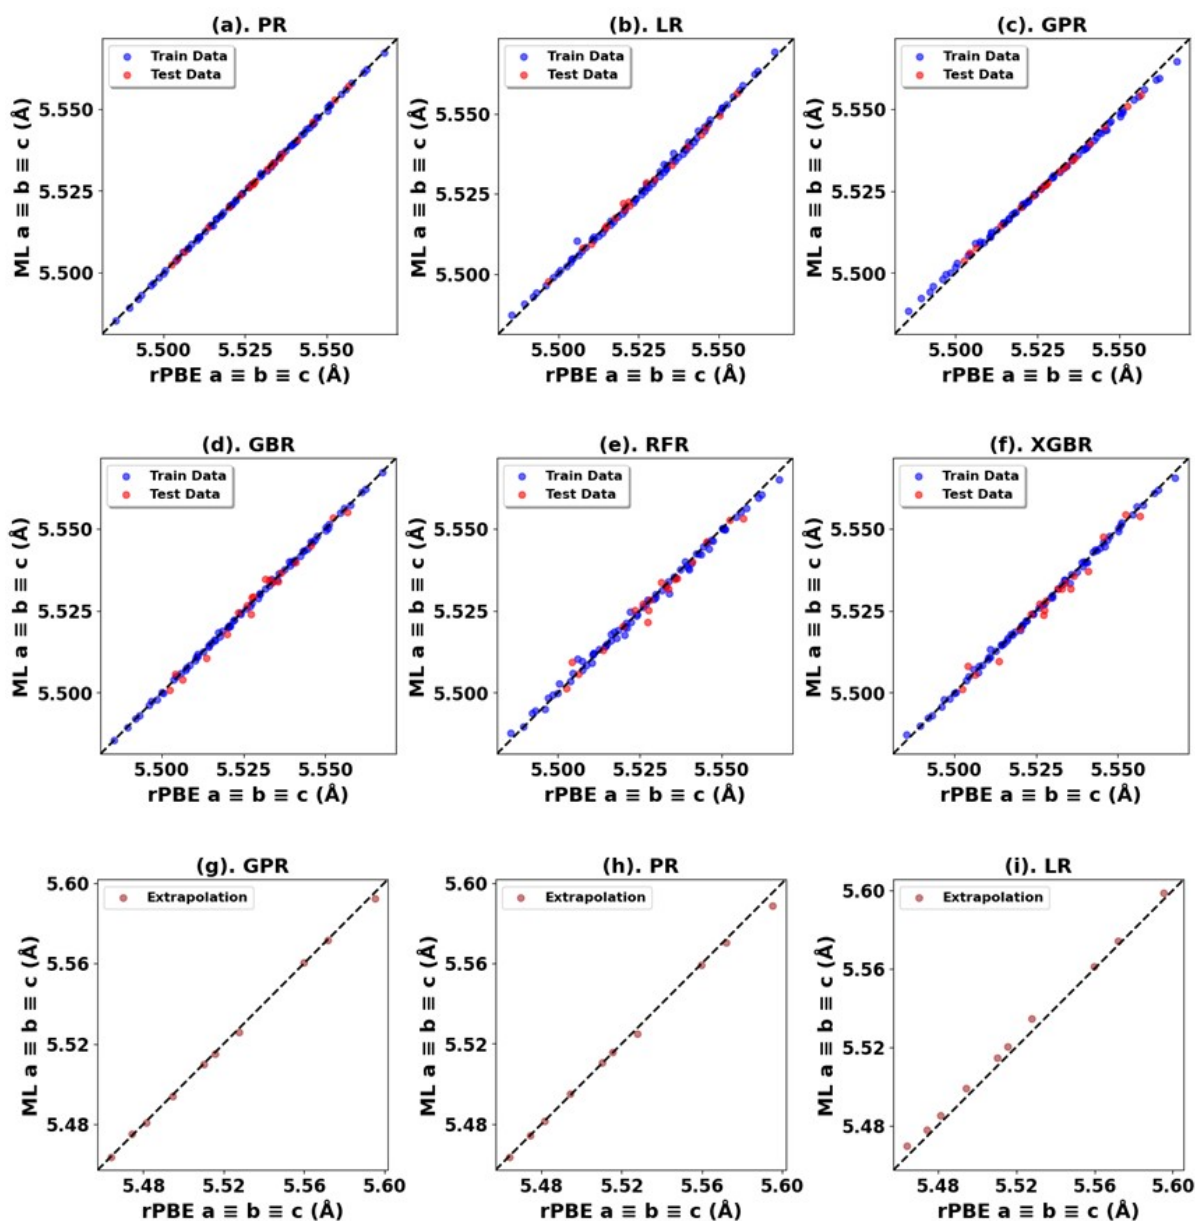

**Figure S64.** (a) - (f) Performance of models for rPBE lattice parameter ( $a = b = c$ ) prediction of c-CeO<sub>2</sub> using the initial range of  $U_p$  from 0.00 eV to 10.00 eV and  $U_f$  from 2.00 eV to 10.00 eV. (g) - (i) Performance of top three models in extrapolation using  $U_p$  and  $U_f$  values beyond these initial ranges.

**Table S28.** Comparative performance of models for rPBE lattice constant ( $a = b = c$ ) prediction in cubic CeO<sub>2</sub>.

| Oxide                  | Model | Initial Range         |          |         |                | Extrapolation         |          |         |                |
|------------------------|-------|-----------------------|----------|---------|----------------|-----------------------|----------|---------|----------------|
|                        |       | MSE (Å <sup>2</sup> ) | RMSE (Å) | MAE (Å) | R <sup>2</sup> | MSE (Å <sup>2</sup> ) | RMSE (Å) | MAE (Å) | R <sup>2</sup> |
| Cubic CeO <sub>2</sub> | GPR   | 0.00                  | 0.00     | 0.00    | 1.00           | 0.00                  | 0.00     | 0.00    | 1.00           |
|                        | *PR   | 0.00                  | 0.00     | 0.00    | 1.00           | 0.00                  | 0.00     | 0.00    | 1.00           |
|                        | LR    | 0.00                  | 0.00     | 0.00    | 1.00           | 0.00                  | 0.00     | 0.00    | 0.99           |

|  |      |      |      |      |      |      |      |      |      |
|--|------|------|------|------|------|------|------|------|------|
|  | GBR  | 0.00 | 0.00 | 0.00 | 0.98 | 0.00 | 0.02 | 0.02 | 0.84 |
|  | XGBR | 0.00 | 0.00 | 0.00 | 0.97 | 0.00 | 0.02 | 0.02 | 0.82 |
|  | RFR  | 0.00 | 0.00 | 0.00 | 0.97 | 0.00 | 0.02 | 0.02 | 0.82 |

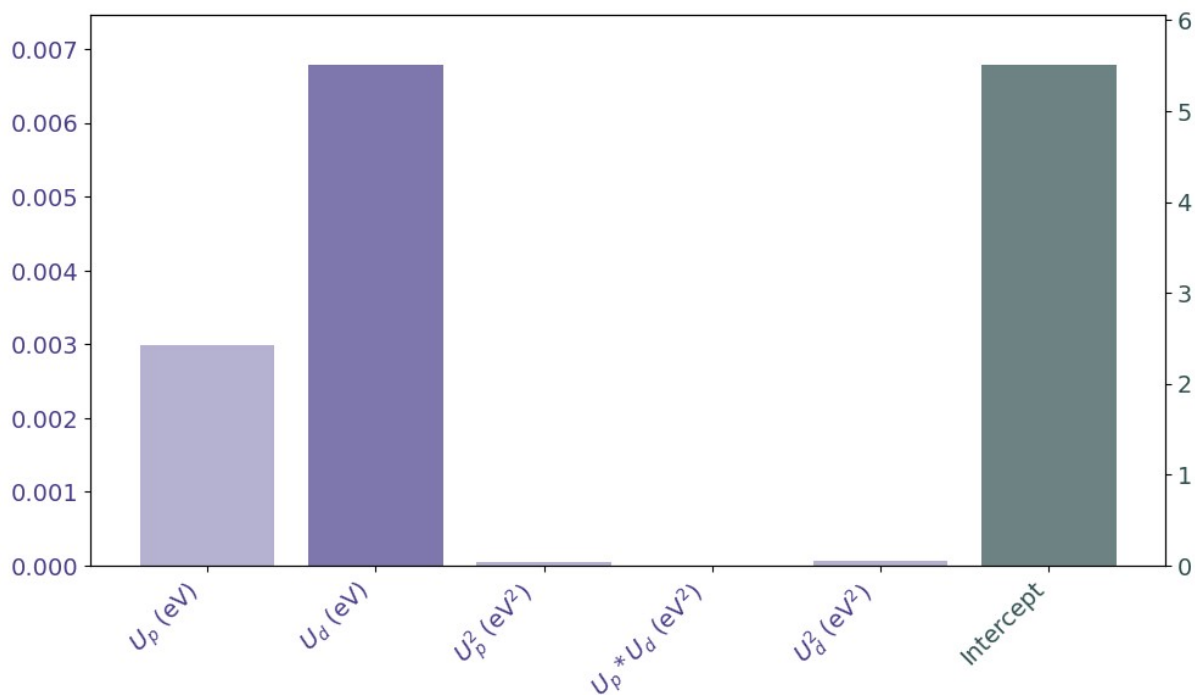

**Figure S65.** Feature importance of the PR model for predicting the rPBE lattice constant ( $a = b = c$ ) of c-CeO<sub>2</sub>. Lighter shades indicate features with negative contributions.

**Table S29.** Influence of  $U_f$  and  $U_p$  on cubic CeO<sub>2</sub> DFT+U (rPBE) predicted lattice parameters ( $a = b, c$ ) and bandgap ( $E_g$ )

| $U_f$ (eV) | $U_p$ (eV) | $a = b = c$ (Å) | $E_g$ (eV) | % Deviation in $a = b = c$ | % Deviation in $E_g$ |
|------------|------------|-----------------|------------|----------------------------|----------------------|
| 0          | 0          | 5.5059          | 1.816      | 1.75                       | -43.25               |
| 2          | 0          | 5.5203          | 1.942      | 2.02                       | -39.31               |
| 2          | 2          | 5.5151          | 1.960      | 1.92                       | -38.75               |
| 2          | 3          | 5.5110          | 1.972      | 1.85                       | -38.38               |
| 2          | 4          | 5.5075          | 1.983      | 1.78                       | -38.03               |
| 2          | 5          | 5.5042          | 1.994      | 1.72                       | -37.69               |
| 2          | 6          | 5.5005          | 2.006      | 1.65                       | -37.31               |
| 2          | 7          | 5.4969          | 2.018      | 1.59                       | -36.94               |
| 2          | 8          | 5.4932          | 2.030      | 1.52                       | -36.56               |
| 2          | 9          | 5.4895          | 2.043      | 1.45                       | -36.16               |
| 2          | 10         | 5.4854          | 2.057      | 1.38                       | -35.72               |
| 3          | 0          | 5.5273          | 2.017      | 2.15                       | -36.97               |
| 3          | 2          | 5.5210          | 2.039      | 2.03                       | -36.28               |

|   |    |        |       |      |        |
|---|----|--------|-------|------|--------|
| 3 | 3  | 5.5178 | 2.050 | 1.97 | -35.94 |
| 3 | 4  | 5.5144 | 2.062 | 1.91 | -35.56 |
| 3 | 5  | 5.5110 | 2.073 | 1.85 | -35.22 |
| 3 | 6  | 5.5073 | 2.085 | 1.78 | -34.84 |
| 3 | 7  | 5.5038 | 2.098 | 1.71 | -34.44 |
| 3 | 8  | 5.4999 | 2.111 | 1.64 | -34.03 |
| 3 | 9  | 5.4960 | 2.125 | 1.57 | -33.59 |
| 3 | 10 | 5.4921 | 2.139 | 1.50 | -33.16 |
| 4 | 0  | 5.5339 | 2.100 | 2.27 | -34.38 |
| 4 | 2  | 5.5276 | 2.122 | 2.15 | -33.69 |
| 4 | 3  | 5.5240 | 2.135 | 2.09 | -33.28 |
| 4 | 4  | 5.5207 | 2.147 | 2.03 | -32.91 |
| 4 | 5  | 5.5173 | 2.158 | 1.96 | -32.56 |
| 4 | 6  | 5.5137 | 2.171 | 1.90 | -32.16 |
| 4 | 7  | 5.5103 | 2.184 | 1.84 | -31.75 |
| 4 | 8  | 5.5063 | 2.198 | 1.76 | -31.31 |
| 4 | 9  | 5.5025 | 2.212 | 1.69 | -30.88 |
| 4 | 10 | 5.4985 | 2.227 | 1.62 | -30.41 |
| 5 | 0  | 5.5401 | 2.188 | 2.39 | -31.63 |
| 5 | 2  | 5.5338 | 2.211 | 2.27 | -30.91 |
| 5 | 3  | 5.5299 | 2.224 | 2.20 | -30.50 |
| 5 | 4  | 5.5270 | 2.235 | 2.14 | -30.16 |
| 5 | 5  | 5.5235 | 2.249 | 2.08 | -29.72 |
| 5 | 6  | 5.5199 | 2.262 | 2.01 | -29.31 |
| 5 | 7  | 5.5162 | 2.276 | 1.94 | -28.88 |
| 5 | 8  | 5.5126 | 2.290 | 1.88 | -28.44 |
| 5 | 9  | 5.5086 | 2.306 | 1.80 | -27.94 |
| 5 | 10 | 5.5045 | 2.322 | 1.73 | -27.44 |
| 6 | 0  | 5.5461 | 2.280 | 2.50 | -28.75 |
| 6 | 2  | 5.5398 | 2.304 | 2.38 | -28.00 |
| 6 | 3  | 5.5365 | 2.317 | 2.32 | -27.59 |
| 6 | 4  | 5.5330 | 2.331 | 2.25 | -27.16 |
| 6 | 5  | 5.5295 | 2.345 | 2.19 | -26.72 |
| 6 | 6  | 5.5259 | 2.358 | 2.12 | -26.31 |
| 6 | 7  | 5.5222 | 2.373 | 2.06 | -25.84 |
| 6 | 8  | 5.5184 | 2.389 | 1.99 | -25.34 |
| 6 | 9  | 5.5145 | 2.405 | 1.91 | -24.84 |
| 6 | 10 | 5.5105 | 2.422 | 1.84 | -24.31 |
| 7 | 0  | 5.5511 | 2.378 | 2.59 | -25.69 |
| 7 | 2  | 5.5457 | 2.403 | 2.49 | -24.91 |
| 7 | 3  | 5.5423 | 2.417 | 2.43 | -24.47 |
| 7 | 4  | 5.5389 | 2.431 | 2.36 | -24.03 |
| 7 | 5  | 5.5353 | 2.446 | 2.30 | -23.56 |
| 7 | 6  | 5.5317 | 2.461 | 2.23 | -23.09 |
| 7 | 7  | 5.5281 | 2.477 | 2.16 | -22.59 |
| 7 | 8  | 5.5242 | 2.493 | 2.09 | -22.09 |



|    |    |        |       |      |        |
|----|----|--------|-------|------|--------|
| 7  | 9  | 5.5204 | 2.510 | 2.02 | -21.56 |
| 7  | 10 | 5.5162 | 2.526 | 1.94 | -21.06 |
| 8  | 0  | 5.5566 | 2.483 | 2.69 | -22.41 |
| 8  | 2  | 5.5503 | 2.512 | 2.57 | -21.50 |
| 8  | 3  | 5.5468 | 2.527 | 2.51 | -21.03 |
| 8  | 4  | 5.5445 | 2.540 | 2.47 | -20.63 |
| 8  | 5  | 5.5410 | 2.556 | 2.40 | -20.13 |
| 8  | 6  | 5.5374 | 2.572 | 2.34 | -19.63 |
| 8  | 7  | 5.5337 | 2.589 | 2.27 | -19.09 |
| 8  | 8  | 5.5299 | 2.606 | 2.20 | -18.56 |
| 8  | 9  | 5.5260 | 2.624 | 2.13 | -18.00 |
| 8  | 10 | 5.5220 | 2.643 | 2.05 | -17.41 |
| 9  | 0  | 5.5623 | 2.589 | 2.80 | -19.09 |
| 9  | 2  | 5.5558 | 2.623 | 2.68 | -18.03 |
| 9  | 3  | 5.5524 | 2.640 | 2.61 | -17.50 |
| 9  | 4  | 5.5502 | 2.655 | 2.57 | -17.03 |
| 9  | 5  | 5.5455 | 2.677 | 2.49 | -16.34 |
| 9  | 6  | 5.5430 | 2.693 | 2.44 | -15.84 |
| 9  | 7  | 5.5393 | 2.710 | 2.37 | -15.31 |
| 9  | 8  | 5.5356 | 2.732 | 2.30 | -14.63 |
| 9  | 9  | 5.5317 | 2.751 | 2.23 | -14.03 |
| 9  | 10 | 5.5274 | 2.771 | 2.15 | -13.41 |
| 10 | 0  | 5.5675 | 2.724 | 2.89 | -14.88 |
| 10 | 2  | 5.5613 | 2.758 | 2.78 | -13.81 |
| 10 | 3  | 5.5576 | 2.777 | 2.71 | -13.22 |
| 10 | 4  | 5.5545 | 2.794 | 2.65 | -12.69 |
| 10 | 5  | 5.5510 | 2.813 | 2.59 | -12.09 |
| 10 | 6  | 5.5474 | 2.829 | 2.52 | -11.59 |
| 10 | 7  | 5.5437 | 2.854 | 2.45 | -10.81 |
| 10 | 8  | 5.5407 | 2.873 | 2.40 | -10.22 |
| 10 | 9  | 5.5359 | 2.898 | 2.31 | -9.44  |
| 10 | 10 | 5.5330 | 2.917 | 2.25 | -8.84  |

**Table S30.** Influence of  $U_f$  and  $U_p$  on cubic  $\text{CeO}_2$  DFT+U (rPBE) predicted lattice parameters ( $a = b, c$ ) and bandgap ( $E_g$ ) [Extrapolation]

| $U_f$ (eV) | $U_p$ (eV) | $a = b = c$ (Å) | $E_g$ (eV) |
|------------|------------|-----------------|------------|
|------------|------------|-----------------|------------|

|    |    |        |       |
|----|----|--------|-------|
| 1  | 11 | 5.4744 | 1.996 |
| 2  | 15 | 5.4640 | 2.126 |
| 4  | 14 | 5.4815 | 2.288 |
| 7  | 15 | 5.4944 | 2.626 |
| 9  | 14 | 5.5102 | 2.858 |
| 10 | 14 | 5.5156 | 3.009 |
| 11 | 4  | 5.5598 | 2.959 |
| 12 | 2  | 5.5719 | 3.114 |
| 13 | 15 | 5.5278 | 3.617 |
| 15 | 0  | 5.5952 | 3.775 |

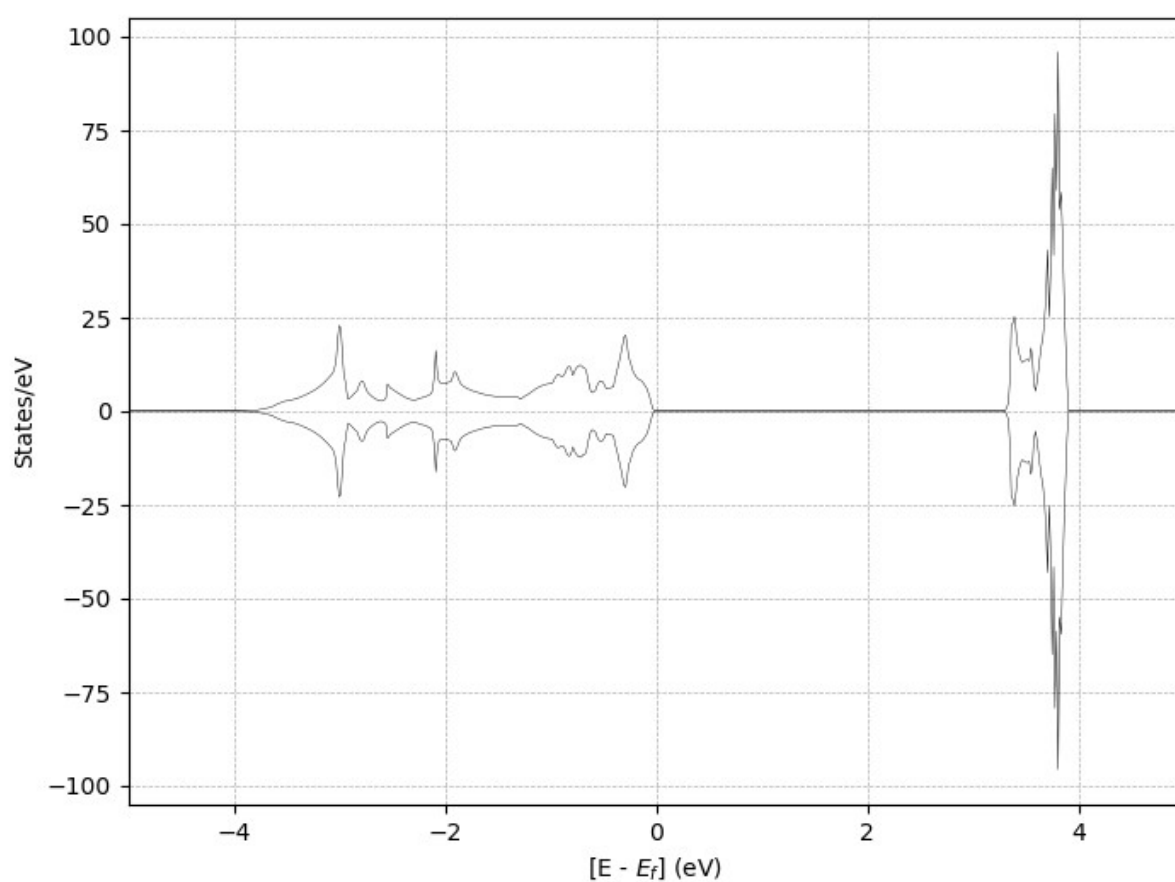

**Figure S66.** DOS for cubic CeO<sub>2</sub> with rPBE functional:  $U_p = 7$  eV,  $U_f = 12$  eV

**PBE:**

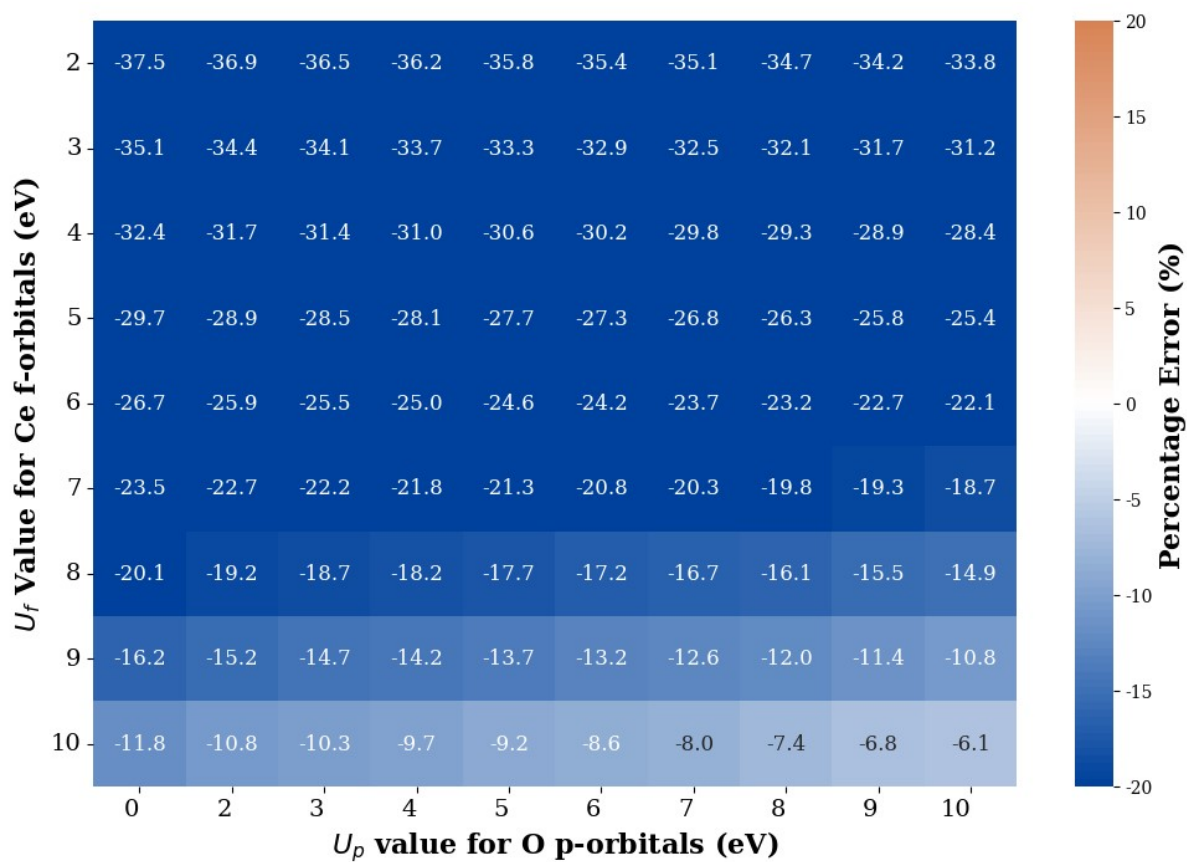

**Figure S67.** Heatmap of PBE predicted band gap for cubic CeO<sub>2</sub> as a function of the  $U_f$  and  $U_p$  parameters.

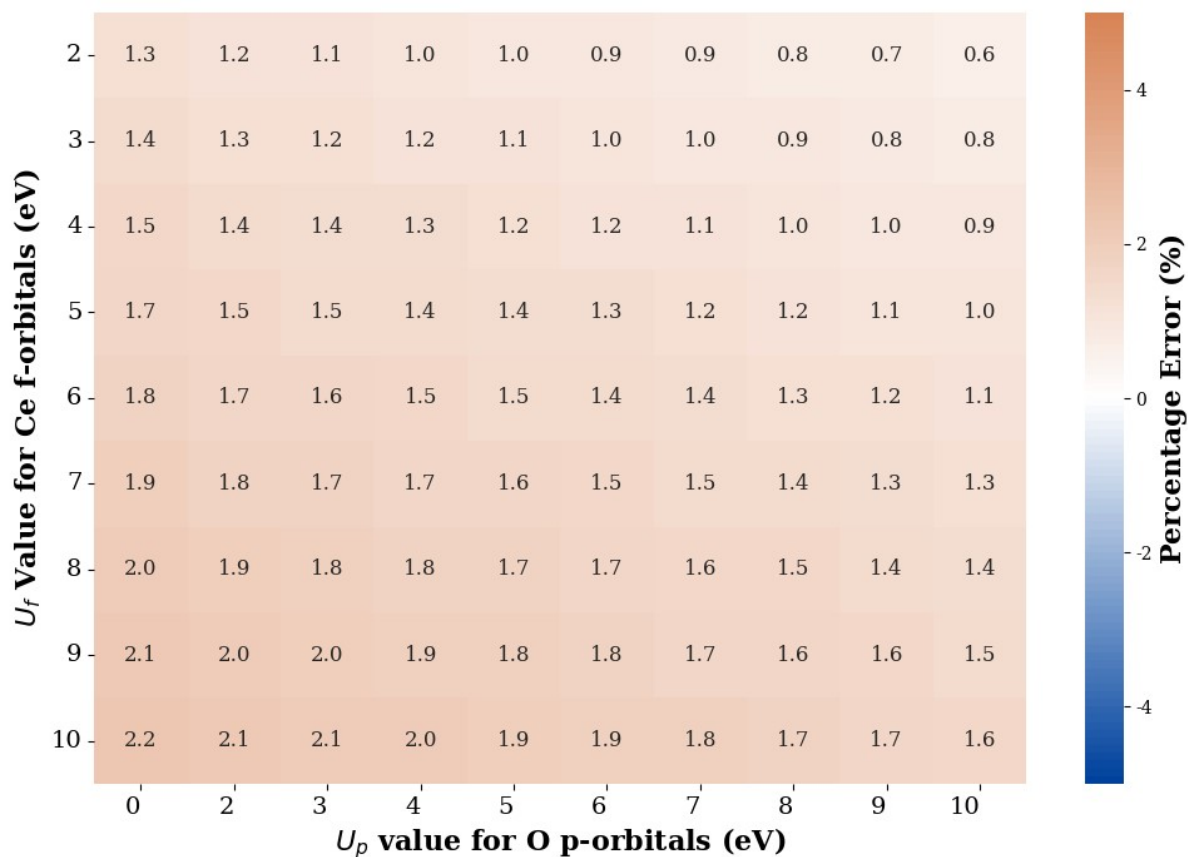

**Figure S68.** Heatmap of PBE predicted lattice constant ( $a = b = c$ ) for cubic  $\text{CeO}_2$  as a function of the  $U_f$  and  $U_p$  parameters.

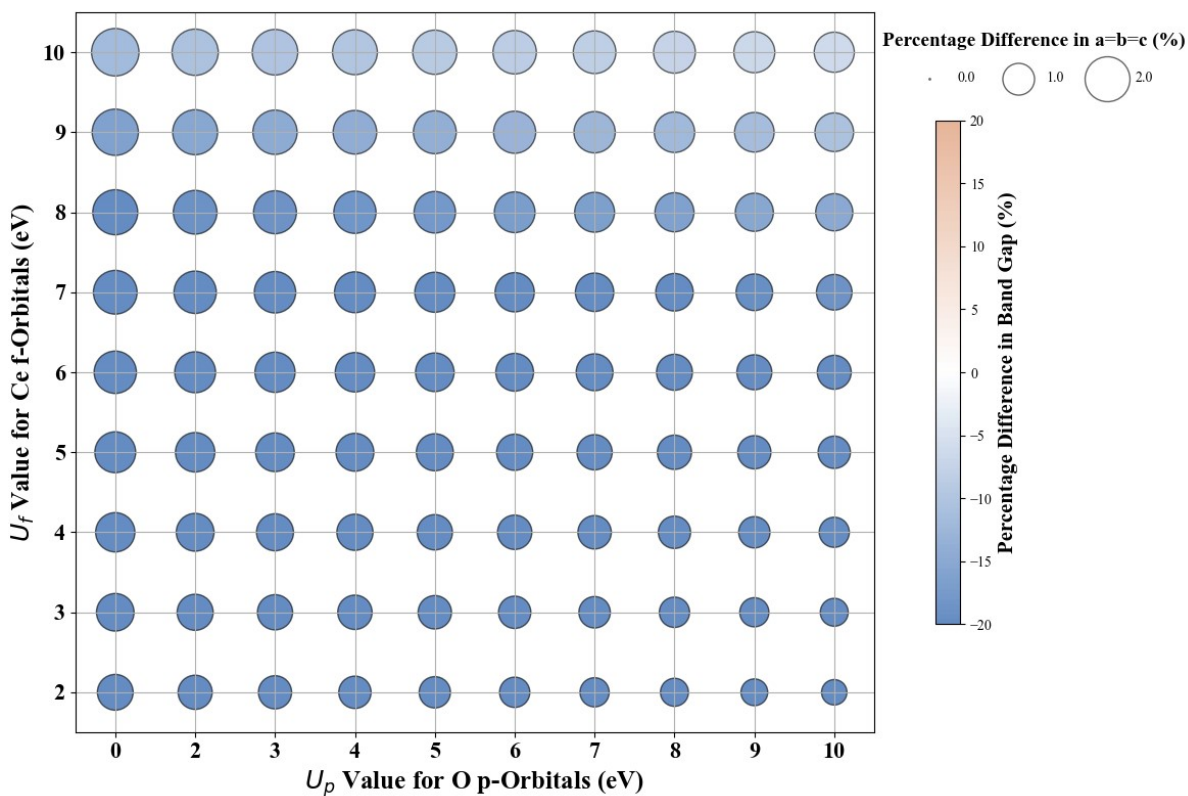

**Figure S69.** Effect of Hubbard U values on PBE band gap and lattice parameters of c-CeO<sub>2</sub>.**Table S31.** Influence of U<sub>f</sub> and U<sub>p</sub> on cubic CeO<sub>2</sub> DFT+U (PBE) predicted lattice parameters (a = b, c) and bandgap (E<sub>g</sub>)

| U <sub>f</sub> (eV) | U <sub>p</sub> (eV) | a = b = c (Å) | E <sub>g</sub> (eV) | % Deviation in a =<br>b = c | % Deviation in E <sub>g</sub> |
|---------------------|---------------------|---------------|---------------------|-----------------------------|-------------------------------|
| 0                   | 0                   | 5.4640        | 1.871               | 0.98                        | -41.53                        |
| 2                   | 0                   | 5.4800        | 1.999               | 1.27                        | -37.53                        |
| 2                   | 2                   | 5.4739        | 2.020               | 1.16                        | -36.88                        |
| 2                   | 3                   | 5.4705        | 2.031               | 1.10                        | -36.53                        |
| 2                   | 4                   | 5.4675        | 2.042               | 1.04                        | -36.19                        |
| 2                   | 5                   | 5.4640        | 2.054               | 0.98                        | -35.81                        |
| 2                   | 6                   | 5.4605        | 2.066               | 0.91                        | -35.44                        |
| 2                   | 7                   | 5.4570        | 2.078               | 0.85                        | -35.06                        |
| 2                   | 8                   | 5.4534        | 2.091               | 0.78                        | -34.66                        |
| 2                   | 9                   | 5.4497        | 2.104               | 0.72                        | -34.25                        |
| 2                   | 10                  | 5.4458        | 2.118               | 0.64                        | -33.81                        |
| 3                   | 0                   | 5.4872        | 2.078               | 1.41                        | -35.06                        |
| 3                   | 2                   | 5.4812        | 2.099               | 1.30                        | -34.41                        |
| 3                   | 3                   | 5.4779        | 2.110               | 1.24                        | -34.06                        |
| 3                   | 4                   | 5.4748        | 2.122               | 1.18                        | -33.69                        |
| 3                   | 5                   | 5.4713        | 2.135               | 1.11                        | -33.28                        |
| 3                   | 6                   | 5.4675        | 2.147               | 1.04                        | -32.91                        |
| 3                   | 7                   | 5.4643        | 2.160               | 0.99                        | -32.50                        |
| 3                   | 8                   | 5.4607        | 2.173               | 0.92                        | -32.09                        |
| 3                   | 9                   | 5.4569        | 2.187               | 0.85                        | -31.66                        |
| 3                   | 10                  | 5.4531        | 2.202               | 0.78                        | -31.19                        |
| 4                   | 0                   | 5.4942        | 2.162               | 1.54                        | -32.44                        |
| 4                   | 2                   | 5.4880        | 2.185               | 1.42                        | -31.72                        |
| 4                   | 3                   | 5.4849        | 2.196               | 1.37                        | -31.38                        |
| 4                   | 4                   | 5.4817        | 2.208               | 1.31                        | -31.00                        |
| 4                   | 5                   | 5.4782        | 2.221               | 1.24                        | -30.59                        |
| 4                   | 6                   | 5.4748        | 2.234               | 1.18                        | -30.19                        |
| 4                   | 7                   | 5.4712        | 2.248               | 1.11                        | -29.75                        |
| 4                   | 8                   | 5.4675        | 2.262               | 1.04                        | -29.31                        |
| 4                   | 9                   | 5.4639        | 2.276               | 0.98                        | -28.88                        |
| 4                   | 10                  | 5.4600        | 2.292               | 0.91                        | -28.38                        |
| 5                   | 0                   | 5.5010        | 2.251               | 1.66                        | -29.66                        |
| 5                   | 2                   | 5.4948        | 2.275               | 1.55                        | -28.91                        |
| 5                   | 3                   | 5.4917        | 2.288               | 1.49                        | -28.50                        |
| 5                   | 4                   | 5.4884        | 2.301               | 1.43                        | -28.09                        |
| 5                   | 5                   | 5.4849        | 2.314               | 1.37                        | -27.69                        |
| 5                   | 6                   | 5.4815        | 2.328               | 1.30                        | -27.25                        |
| 5                   | 7                   | 5.4780        | 2.342               | 1.24                        | -26.81                        |

|    |    |        |       |      |        |
|----|----|--------|-------|------|--------|
| 5  | 8  | 5.4743 | 2.357 | 1.17 | -26.34 |
| 5  | 9  | 5.4705 | 2.373 | 1.10 | -25.84 |
| 5  | 10 | 5.4675 | 2.387 | 1.04 | -25.41 |
| 6  | 0  | 5.5076 | 2.346 | 1.78 | -26.69 |
| 6  | 2  | 5.5014 | 2.372 | 1.67 | -25.88 |
| 6  | 3  | 5.4981 | 2.385 | 1.61 | -25.47 |
| 6  | 4  | 5.4949 | 2.399 | 1.55 | -25.03 |
| 6  | 5  | 5.4914 | 2.413 | 1.49 | -24.59 |
| 6  | 6  | 5.4880 | 2.427 | 1.42 | -24.16 |
| 6  | 7  | 5.4844 | 2.443 | 1.36 | -23.66 |
| 6  | 8  | 5.4808 | 2.459 | 1.29 | -23.16 |
| 6  | 9  | 5.4770 | 2.475 | 1.22 | -22.66 |
| 6  | 10 | 5.4732 | 2.492 | 1.15 | -22.13 |
| 7  | 0  | 5.5140 | 2.448 | 1.90 | -23.50 |
| 7  | 2  | 5.5078 | 2.475 | 1.79 | -22.66 |
| 7  | 3  | 5.5038 | 2.490 | 1.71 | -22.19 |
| 7  | 4  | 5.5011 | 2.504 | 1.67 | -21.75 |
| 7  | 5  | 5.4977 | 2.519 | 1.60 | -21.28 |
| 7  | 6  | 5.4942 | 2.534 | 1.54 | -20.81 |
| 7  | 7  | 5.4906 | 2.551 | 1.47 | -20.28 |
| 7  | 8  | 5.4870 | 2.566 | 1.41 | -19.81 |
| 7  | 9  | 5.4832 | 2.584 | 1.33 | -19.25 |
| 7  | 10 | 5.4793 | 2.602 | 1.26 | -18.69 |
| 8  | 0  | 5.5203 | 2.557 | 2.02 | -20.09 |
| 8  | 2  | 5.5139 | 2.587 | 1.90 | -19.16 |
| 8  | 3  | 5.5105 | 2.602 | 1.84 | -18.69 |
| 8  | 4  | 5.5073 | 2.618 | 1.78 | -18.19 |
| 8  | 5  | 5.5039 | 2.634 | 1.72 | -17.69 |
| 8  | 6  | 5.5004 | 2.650 | 1.65 | -17.19 |
| 8  | 7  | 5.4968 | 2.667 | 1.59 | -16.66 |
| 8  | 8  | 5.4931 | 2.685 | 1.52 | -16.09 |
| 8  | 9  | 5.4894 | 2.703 | 1.45 | -15.53 |
| 8  | 10 | 5.4855 | 2.722 | 1.38 | -14.94 |
| 9  | 0  | 5.5263 | 2.682 | 2.13 | -16.19 |
| 9  | 2  | 5.5200 | 2.713 | 2.01 | -15.22 |
| 9  | 3  | 5.5167 | 2.729 | 1.95 | -14.72 |
| 9  | 4  | 5.5134 | 2.745 | 1.89 | -14.22 |
| 9  | 5  | 5.5100 | 2.762 | 1.83 | -13.69 |
| 9  | 6  | 5.5064 | 2.779 | 1.76 | -13.16 |
| 9  | 7  | 5.5028 | 2.797 | 1.70 | -12.59 |
| 9  | 8  | 5.4991 | 2.816 | 1.63 | -12.00 |
| 9  | 9  | 5.4953 | 2.835 | 1.56 | -11.41 |
| 9  | 10 | 5.4914 | 2.856 | 1.49 | -10.75 |
| 10 | 0  | 5.5323 | 2.823 | 2.24 | -11.78 |
| 10 | 2  | 5.5260 | 2.855 | 2.13 | -10.78 |
| 10 | 3  | 5.5227 | 2.872 | 2.06 | -10.25 |

|    |    |        |       |      |       |
|----|----|--------|-------|------|-------|
| 10 | 4  | 5.5194 | 2.889 | 2.00 | -9.72 |
| 10 | 5  | 5.5159 | 2.906 | 1.94 | -9.19 |
| 10 | 6  | 5.5124 | 2.925 | 1.87 | -8.59 |
| 10 | 7  | 5.5088 | 2.944 | 1.81 | -8.00 |
| 10 | 8  | 5.5051 | 2.964 | 1.74 | -7.38 |
| 10 | 9  | 5.5013 | 2.984 | 1.67 | -6.75 |
| 10 | 10 | 5.4974 | 3.006 | 1.60 | -6.06 |

**Table S32.** Influence of  $U_f$  and  $U_p$  on cubic  $\text{CeO}_2$  DFT+U (PBE) predicted lattice parameters ( $a = b, c$ ) and bandgap ( $E_g$ ) [Extrapolation]

| $U_f$ (eV) | $U_p$ (eV) | $a = b = c$ (Å) | $E_g$ (eV) |
|------------|------------|-----------------|------------|
| 1          | 11         | 5.43445252      | 2.056      |
| 2          | 15         | 5.42535441      | 2.192      |
| 4          | 14         | 5.44371077      | 2.357      |
| 7          | 15         | 5.45838377      | 2.702      |
| 9          | 14         | 5.47476963      | 2.944      |
| 10         | 14         | 5.48063984      | 3.099      |
| 11         | 4          | 5.52537163      | 3.053      |
| 12         | 2          | 5.53703115      | 3.206      |
| 13         | 15         | 5.49396998      | 3.716      |
| 15         | 0          | 5.5612335       | 3.87       |

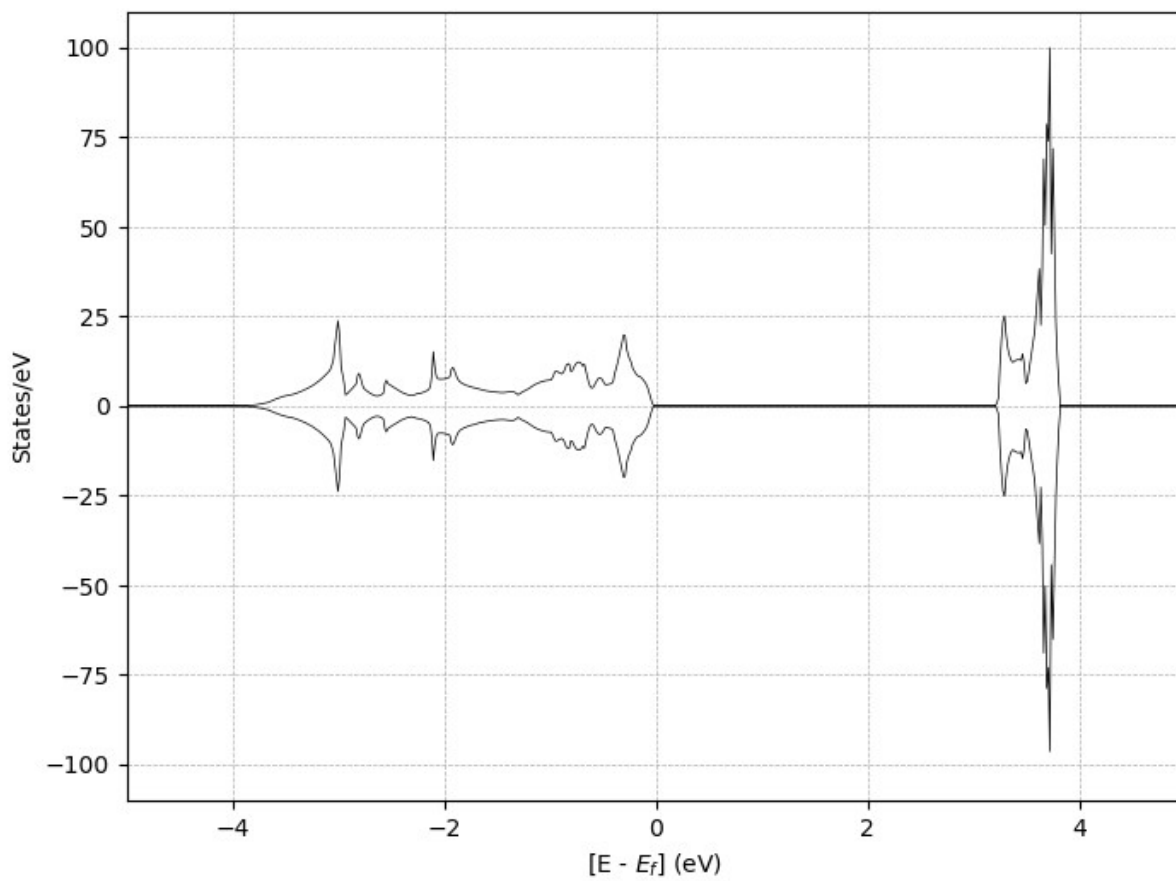

**Figure S70.** DOS for cubic CeO<sub>2</sub> with rPBE functional:  $U_p = 2$  eV,  $U_f = 12$  eV



## Further Analysis:

**Table S33.** Descriptions of constituent elements and metal oxide features considered in model training across metal oxides. \*Possible redundant feature.

| Feature                          | Description                                                              |
|----------------------------------|--------------------------------------------------------------------------|
| POSCAR Crystal System            | Crystal system of the metal oxide structure from POSCAR data             |
| Oxide                            | Metal oxide formula                                                      |
| U <sub>d</sub> _Value/eV         | U <sub>d</sub> value applied to the d-orbitals of the metal (X)          |
| U <sub>f</sub> _Value/eV         | U <sub>f</sub> value applied to the f-orbitals of the metal (X)          |
| U <sub>p</sub> _Value/eV         | U <sub>p</sub> value applied to the p-orbitals of oxygen                 |
| Number of X atoms                | Number of metal (X) atoms in the metal oxide unit cell                   |
| Number of O atoms                | Number of oxygen (O) atoms in the metal oxide unit cell                  |
| POSCAR $\alpha$ (°)              | Alpha angle of the metal oxide structure in degrees                      |
| POSCAR $\beta$ (°)               | Beta angle of the metal oxide structure in degrees                       |
| POSCAR $\gamma$ (°)              | Gamma angle of the metal oxide structure in degrees                      |
| *POSCAR Volume (Å <sup>3</sup> ) | Volume of the metal oxide structure in cubic angstroms (Å <sup>3</sup> ) |
| POSCAR a (Å)                     | Lattice constant a of the metal oxide structure in angstroms (Å)         |
| POSCAR b (Å)                     | Lattice constant b of the metal oxide structure in angstroms (Å)         |
| POSCAR c (Å)                     | Lattice constant c of the metal oxide structure in angstroms (Å)         |
| POSCAR Space Group               | Space group of the metal oxide structure                                 |
| POSCAR Hall Number               | Hall number of the metal oxide structure                                 |
| POSCAR International Number      | International number of the metal oxide structure                        |
| *POSCAR Symbol                   | Symbol of the metal oxide structure                                      |
| POSCAR Point Group               | Point group of the metal oxide structure                                 |
| Space_group_number_of_X          | Space group number of the metal (X)                                      |
| Space_group_of_X                 | Space group of the metal (X)                                             |
| Structure_of_X                   | Structure type of metal (X)                                              |
| Lattice_constant_a_of_X_pm       | Lattice constant a of the metal (X) structure in picometers (pm)         |
| Lattice_constant_b_of_X_pm       | Lattice constant b of the metal (X) structure in picometers (pm)         |
| Lattice_constant_c_of_X_pm       | Lattice constant c of the metal (X) structure in picometers (pm)         |
| Atomic_radius/pm_of_X            | Atomic radius of the metal (X) in picometers (pm)                        |
| Van_der_Waals_radius/pm_of_X     | Van der Waals radius of the metal (X) in picometers (pm)                 |

|                                                       |                                                                          |
|-------------------------------------------------------|--------------------------------------------------------------------------|
| Atomic_No_of_X                                        | Atomic number of the metal (X)                                           |
| Atomic_Mass/amu_of_X                                  | Atomic mass of the metal (X) in atomic mass units (amu)                  |
| Period_of_X                                           | Period of the metal (X) in the periodic table                            |
| First_ionization_energy/KJ/mol_of_X                   | First ionization energy of the metal (X) in kJ/mol                       |
| Density/Kg/m <sup>3</sup> _of_X                       | Density of the metal (X) in kg/m <sup>3</sup>                            |
| Electron_Affinity/eV_of_X                             | Electron affinity of the metal (X) in electron volts (eV)                |
| Work_Function/eV_of_X                                 | Work function of the metal (X) in electron volts (eV)                    |
| Pauling_Electronegativity/units_of_X                  | Pauling electronegativity of the metal (X)                               |
| d-shell_of_X                                          | Number of electrons in the d-shell of the metal (X)                      |
| Lattice_angle_alpha_of_X_degree                       | Alpha angle of the metal (X) structure in degrees                        |
| Lattice_angle_beta_of_X_degree                        | Beta angle of the metal (X) structure in degrees                         |
| Lattice_angle_gamma_of_X_degree                       | Gamma angle of the metal (X) structure in degrees                        |
| Pauling_Electronegativity_Difference/units_of_O_and_X | Pauling electronegativity difference between oxygen (O) and metal (X)    |
| Mean Metal Valence Electrons                          | Mean number of valence electrons for metal (X)                           |
| Mean Metal Bond Length (Å)                            | Mean bond length between metal (X) and its neighbors in angstroms (Å)    |
| Min Metal Bond Length (Å)                             | Minimum bond length between metal (X) and its neighbors in angstroms (Å) |
| Max Metal Bond Length (Å)                             | Maximum bond length between metal (X) and its neighbors in angstroms (Å) |
| Std Metal Bond Length (Å)                             | Standard deviation of bond lengths for metal (X) and its neighbors in Å  |
| Sum Metal Bond Length (Å)                             | Sum of bond lengths for metal (X) and its neighbors in angstroms (Å)     |
| Mean Metal Coordination Number                        | Mean coordination number of metal (X)                                    |
| Min Metal Coordination Number                         | Minimum coordination number of metal (X)                                 |
| Max Metal Coordination Number                         | Maximum coordination number of metal (X)                                 |
| Std Metal Coordination Number                         | Standard deviation of coordination numbers for metal (X)                 |
| Sum Metal Coordination Number                         | Sum of coordination numbers for metal (X)                                |
| Mean Metal Oxidation State                            | Mean oxidation state of metal (X)                                        |
| Mean Oxygen Valence Electrons                         | Mean number of valence electrons for oxygen atoms                        |
| Mean Oxygen Bond Length (Å)                           | Mean bond length between oxygen and its neighbors in angstroms (Å)       |
| Min Oxygen Bond Length (Å)                            | Minimum bond length between oxygen and its neighbors in angstroms (Å)    |
| Max Oxygen Bond Length (Å)                            | Maximum bond length between oxygen and its neighbors in angstroms (Å)    |

|                                 |                                                                      |
|---------------------------------|----------------------------------------------------------------------|
| Std Oxygen Bond Length (Å)      | Standard deviation of bond lengths for oxygen and its neighbors in Å |
| Sum Oxygen Bond Length (Å)      | Sum of bond lengths for oxygen and its neighbors in angstroms (Å)    |
| Mean Oxygen Coordination Number | Mean coordination number of oxygen atoms                             |
| Min Oxygen Coordination Number  | Minimum coordination number of oxygen atoms                          |
| Max Oxygen Coordination Number  | Maximum coordination number of oxygen atoms                          |
| Std Oxygen Coordination Number  | Standard deviation of coordination numbers for oxygen atoms          |
| Sum Oxygen Coordination Number  | Sum of coordination numbers for oxygen atoms                         |
| Mean Oxygen Oxidation State     | Mean oxidation state of oxygen atoms                                 |

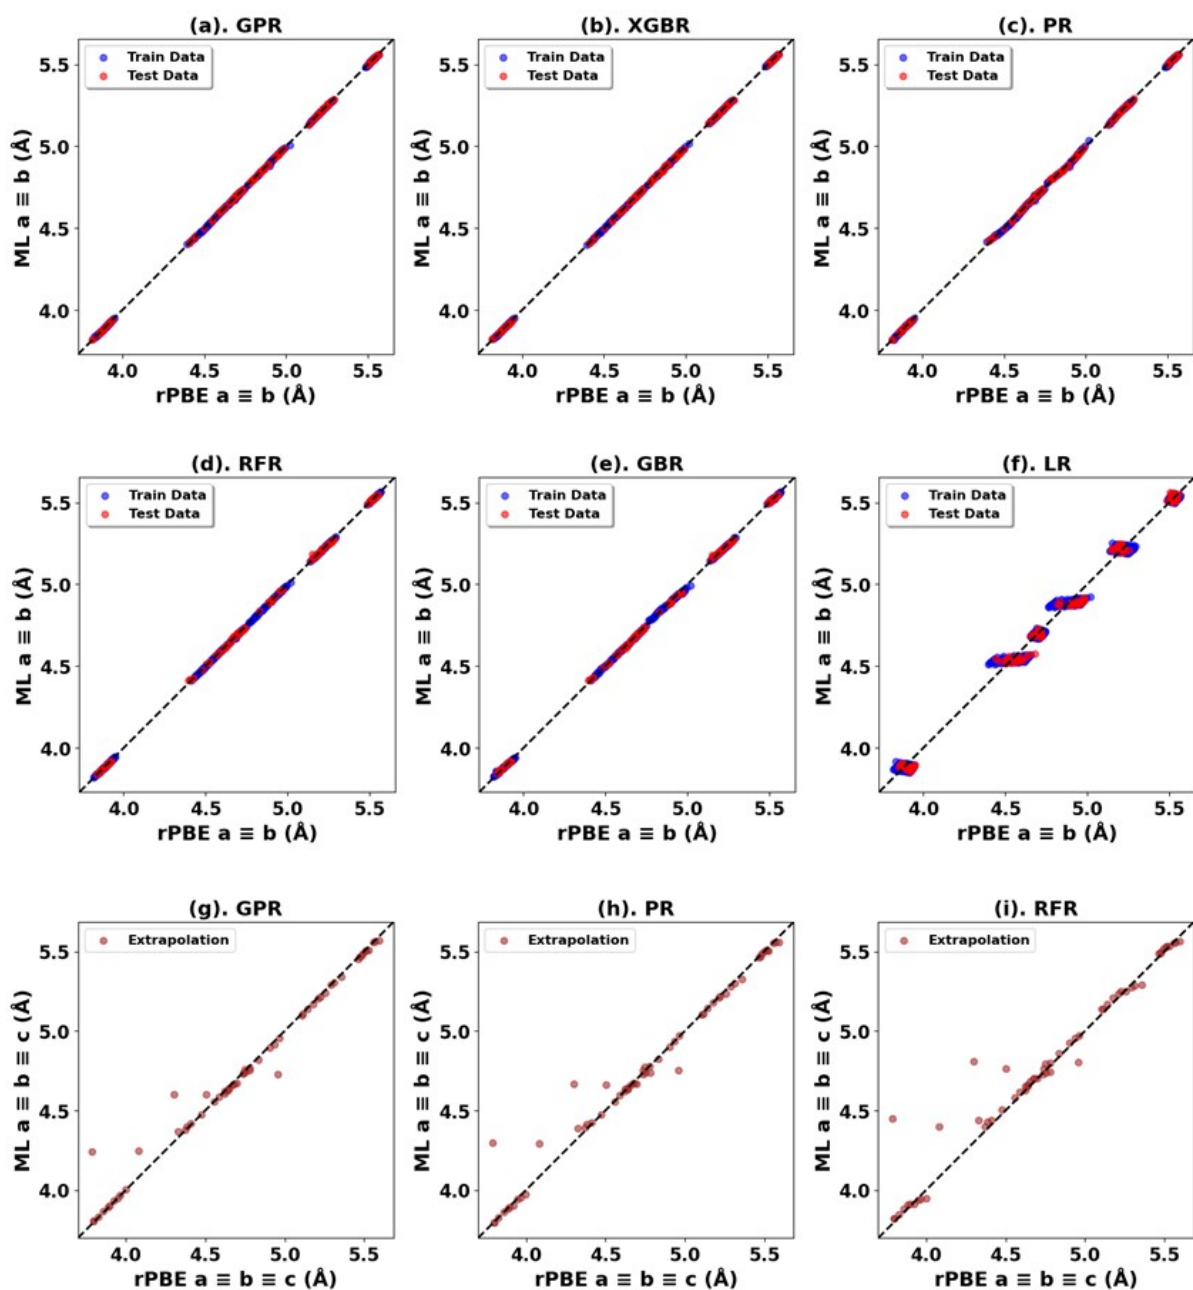

**Figure S71.** (a) - (f) Performance of ML models for rPBE lattice parameter ( $a = b$ ) prediction across all six (6) primary metal oxides. (g) - (i) Performance of models in extrapolation using  $U_p$  and  $U_{d/f}$  values beyond the initial range.

**Table S34.** Comparative performance of ML models for rPBE lattice parameter ( $a = b$ ) prediction across all six primary metal oxides.

| Oxides                                                  | Model | Initial Range             |                          |                         |                | Extrapolation             |                          |                         |                |
|---------------------------------------------------------|-------|---------------------------|--------------------------|-------------------------|----------------|---------------------------|--------------------------|-------------------------|----------------|
|                                                         |       | MSE<br>( $\text{\AA}^2$ ) | RMSE<br>( $\text{\AA}$ ) | MAE<br>( $\text{\AA}$ ) | R <sup>2</sup> | MSE<br>( $\text{\AA}^2$ ) | RMSE<br>( $\text{\AA}$ ) | MAE<br>( $\text{\AA}$ ) | R <sup>2</sup> |
| All six (6)<br>primary metal<br>oxides in this<br>study | *GPR  | 0.00                      | 0.00                     | 0.00                    | 1.00           | 0.01                      | 0.08                     | 0.03                    | 0.98           |
|                                                         | PR    | 0.00                      | 0.01                     | 0.00                    | 1.00           | 0.01                      | 0.09                     | 0.03                    | 0.97           |
|                                                         | RFR   | 0.00                      | 0.01                     | 0.00                    | 1.00           | 0.02                      | 0.12                     | 0.05                    | 0.95           |
|                                                         | XGBR  | 0.00                      | 0.00                     | 0.00                    | 1.00           | 0.02                      | 0.12                     | 0.05                    | 0.95           |
|                                                         | GBR   | 0.00                      | 0.01                     | 0.01                    | 1.00           | 0.02                      | 0.13                     | 0.06                    | 0.94           |
|                                                         | LR    | 0.00                      | 0.04                     | 0.04                    | 0.99           | 0.03                      | 0.16                     | 0.09                    | 0.92           |
|                                                         |       |                           |                          |                         |                |                           |                          |                         |                |

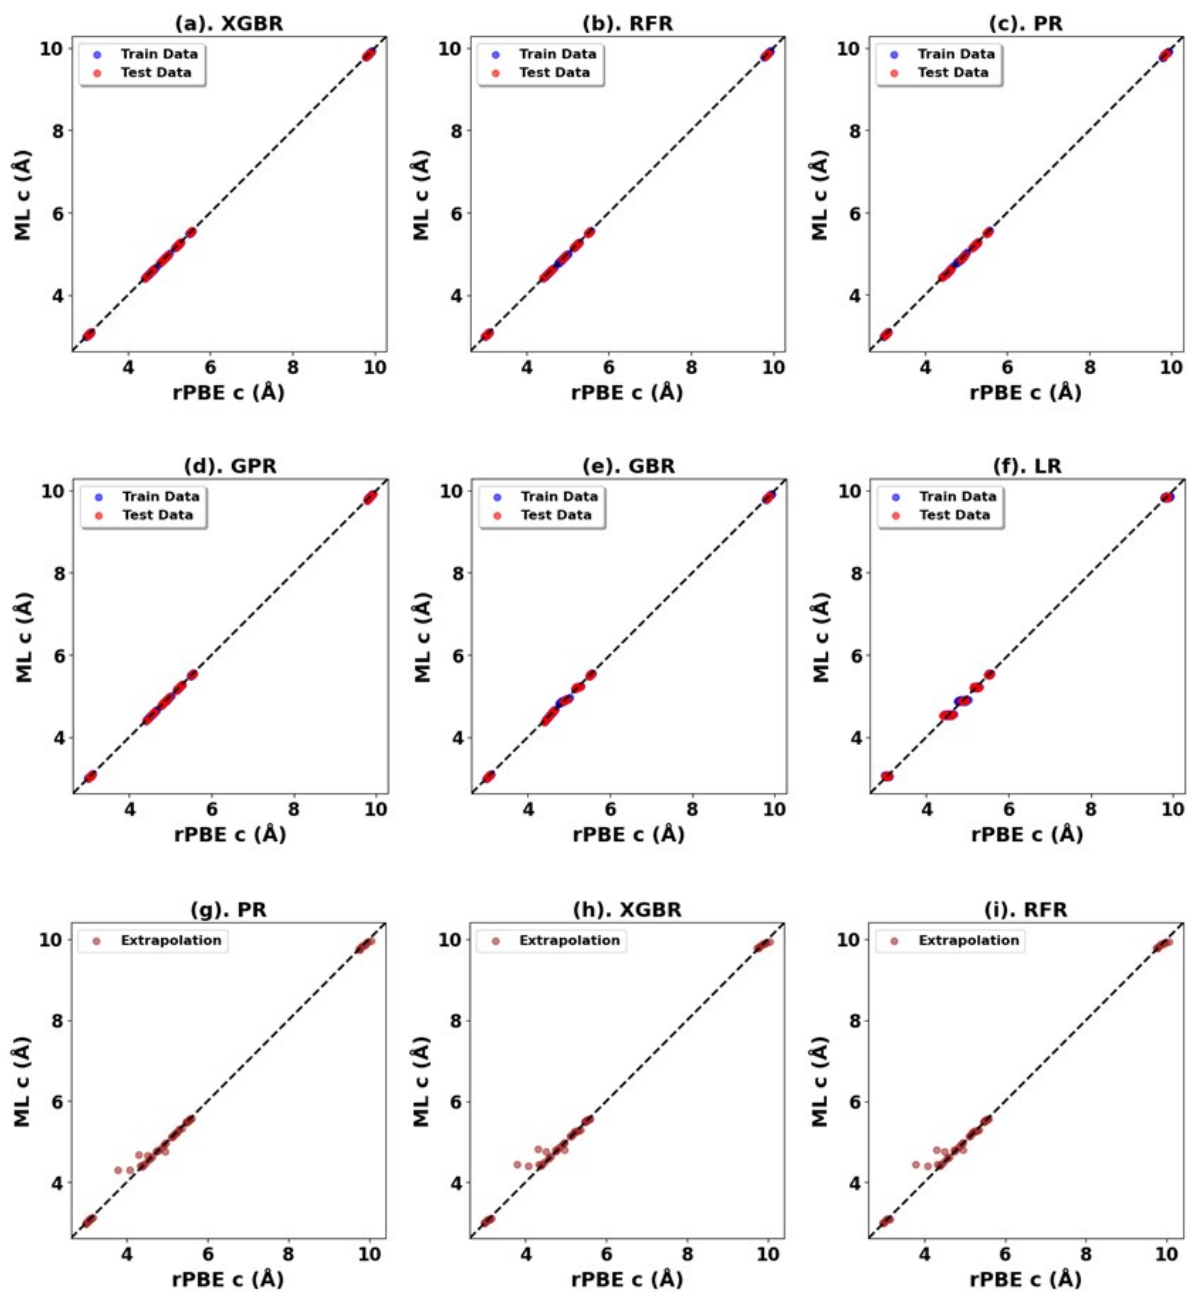

**Figure S72.** (a) - (f) Performance of ML models for rPBE lattice parameter ( $c$ ) prediction across all six (6) primary metal oxides. (g) - (i) Performance of models in extrapolation using  $U_p$  and  $U_{d/f}$  values beyond the initial range.

**Table S35.** Comparative performance of ML models for rPBE lattice parameter (c) prediction across all six primary metal oxides.

| Oxides                                                  | Model | Initial Range            |             |            |                | Extrapolation            |             |            |                |
|---------------------------------------------------------|-------|--------------------------|-------------|------------|----------------|--------------------------|-------------|------------|----------------|
|                                                         |       | MSE<br>(Å <sup>2</sup> ) | RMSE<br>(Å) | MAE<br>(Å) | R <sup>2</sup> | MSE<br>(Å <sup>2</sup> ) | RMSE<br>(Å) | MAE<br>(Å) | R <sup>2</sup> |
| All six (6)<br>primary metal<br>oxides in this<br>study | PR    | 0.00                     | 0.01        | 0.00       | 1.00           | 0.01                     | 0.10        | 0.04       | 1.00           |
|                                                         | *XGBR | 0.00                     | 0.00        | 0.00       | 1.00           | 0.02                     | 0.13        | 0.06       | 1.00           |
|                                                         | RFR   | 0.00                     | 0.01        | 0.00       | 1.00           | 0.02                     | 0.13        | 0.06       | 1.00           |
|                                                         | GBR   | 0.00                     | 0.02        | 0.01       | 1.00           | 0.02                     | 0.14        | 0.06       | 1.00           |
|                                                         | LR    | 0.00                     | 0.05        | 0.04       | 1.00           | 0.03                     | 0.17        | 0.10       | 0.99           |
|                                                         | GPR   | 0.00                     | 0.01        | 0.00       | 1.00           | 0.04                     | 0.20        | 0.14       | 0.99           |

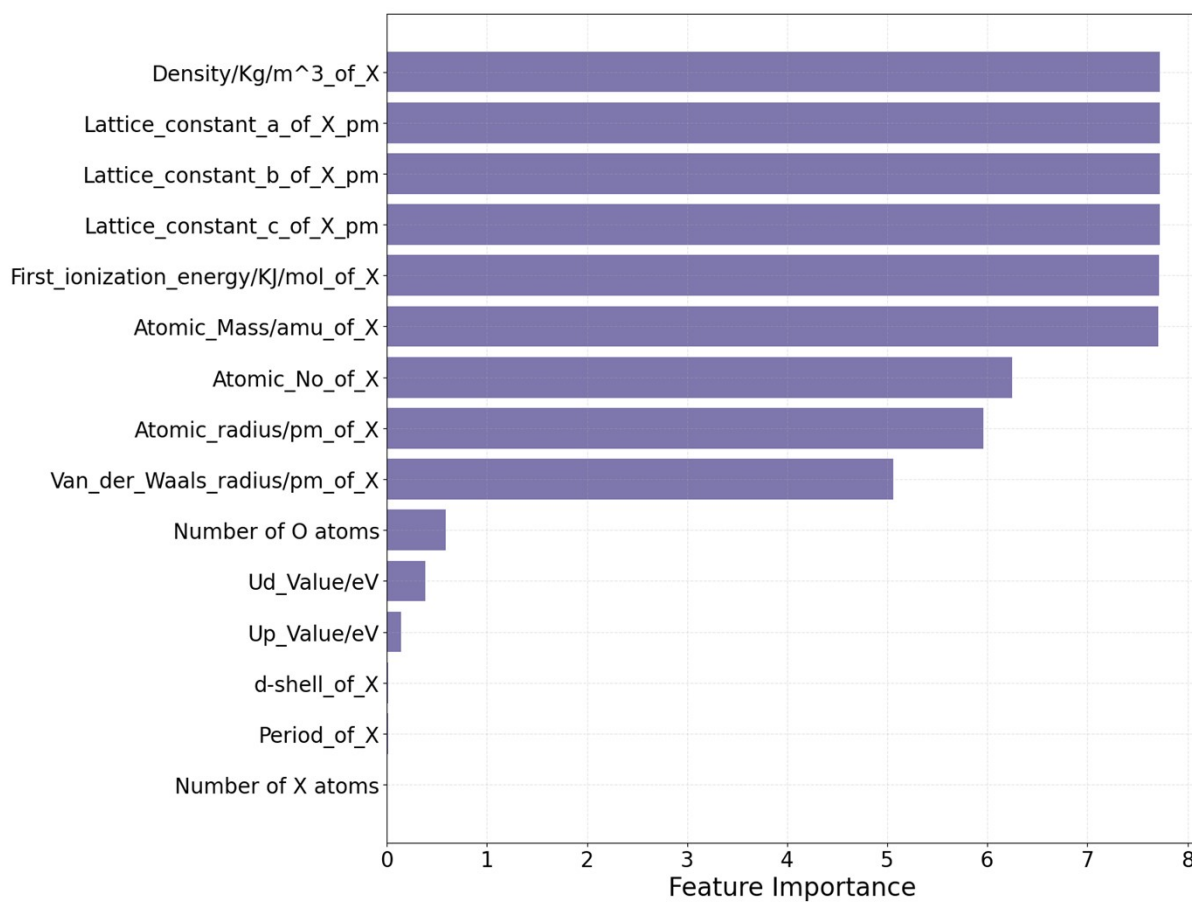

**Figure S73.** Feature importance analysis from the GPR Model for predicting the rPBE band gap across six primary metal oxides.



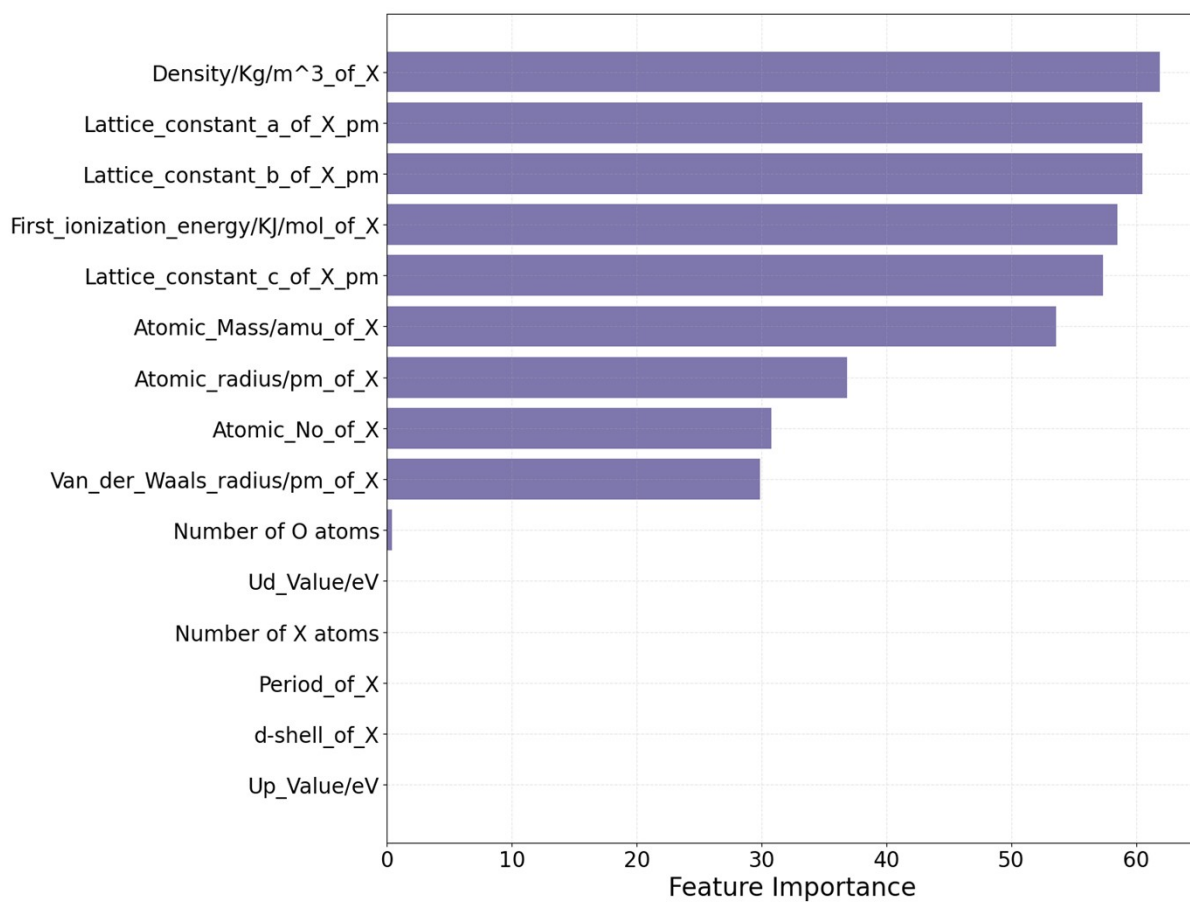

**Figure S74.** Feature importance analysis from the GPR Model for predicting the rPBE lattice constant ( $a = b$ ) across six primary metal oxides.

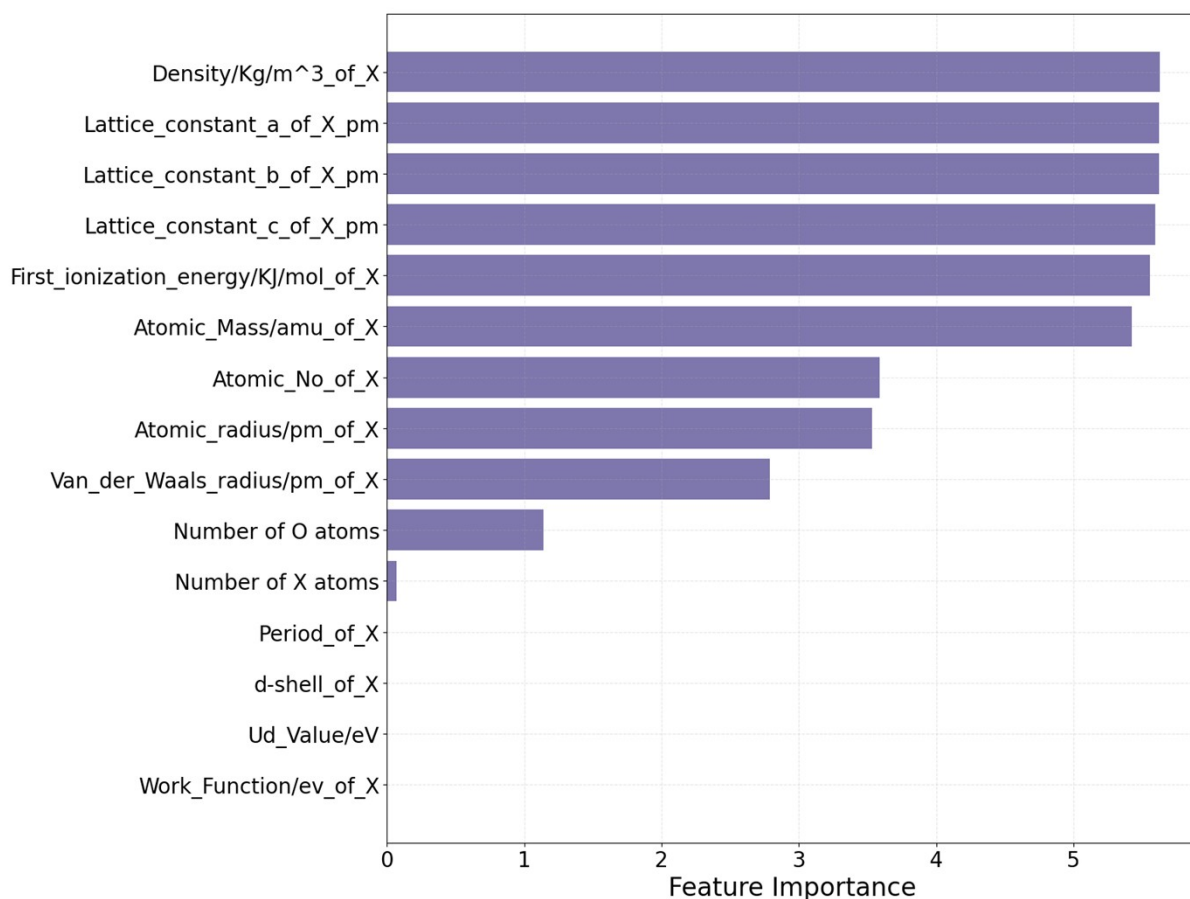

**Figure S75.** Feature importance analysis from the GPR Model for predicting the rPBE lattice constant (c) across six primary metal oxides.

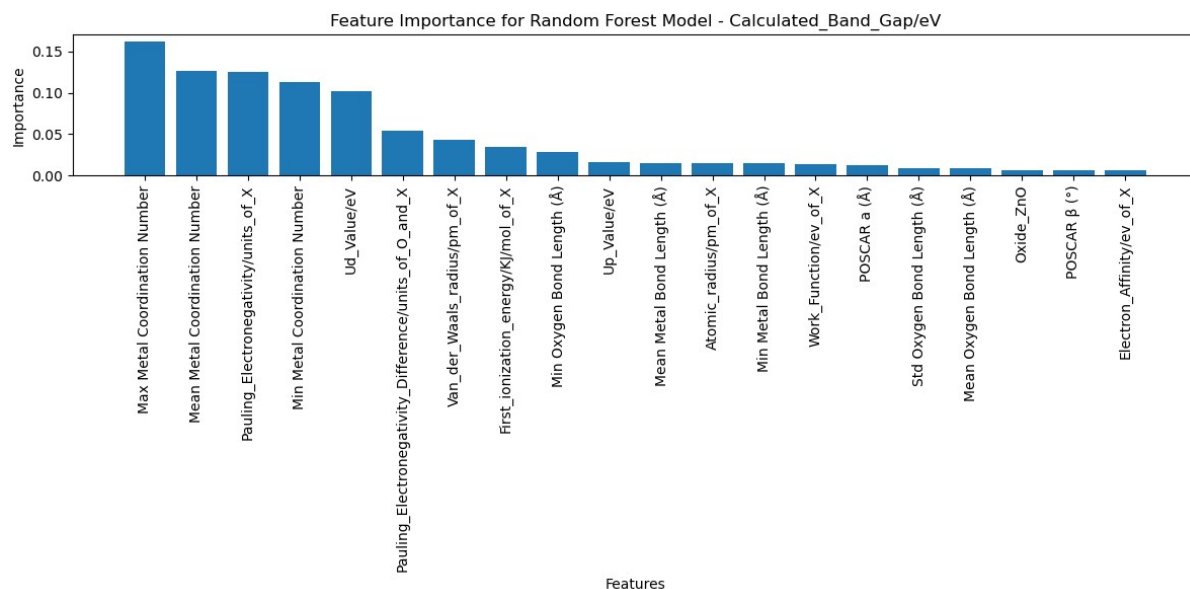

**Figure S76.** Feature importance analysis from the RFR Model for predicting the rPBE band gap across thirty-eight (38) metal oxides.

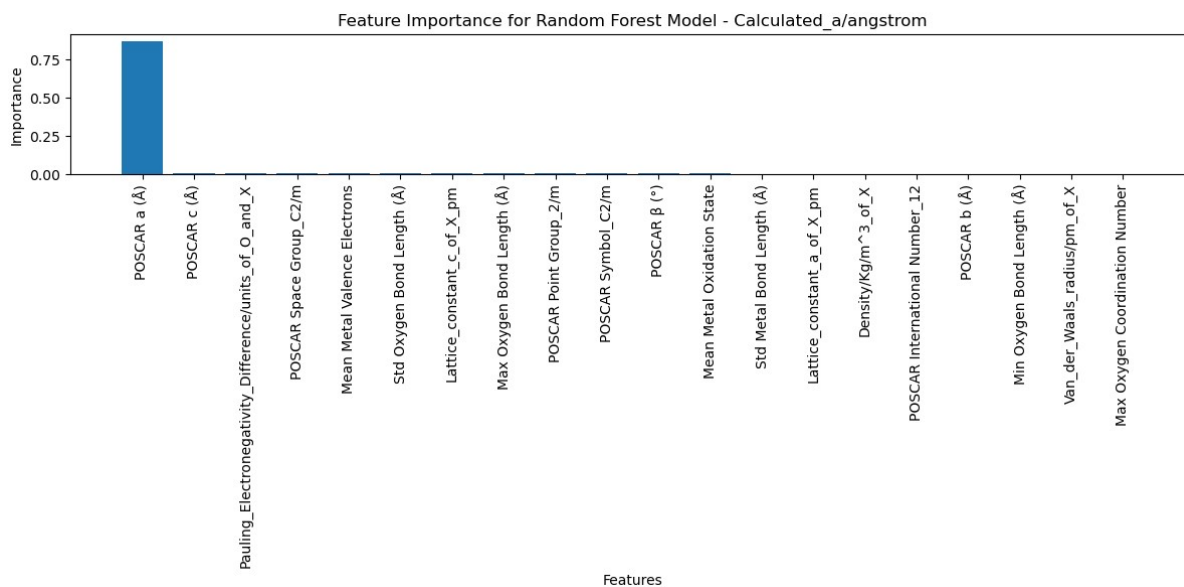

**Figure S77.** Feature importance analysis from the RFR Model for predicting the rPBE lattice constant (a) across thirty-eight (38) metal oxides.

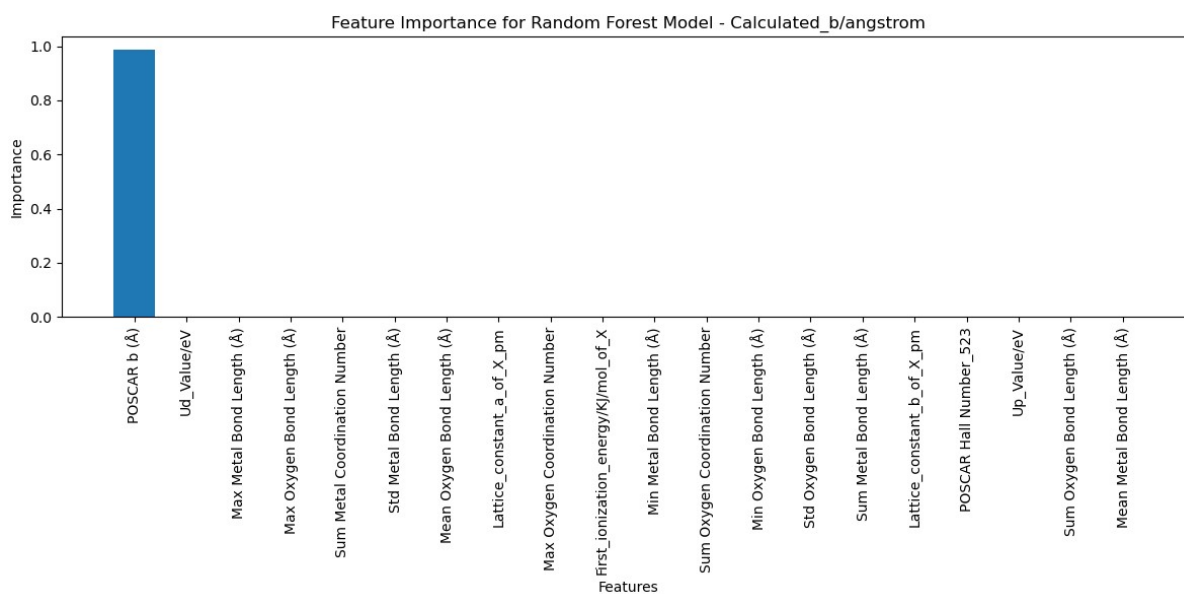

**Figure S78.** Feature importance analysis from the RFR Model for predicting the rPBE lattice constant (b) across thirty-eight (38) metal oxides.

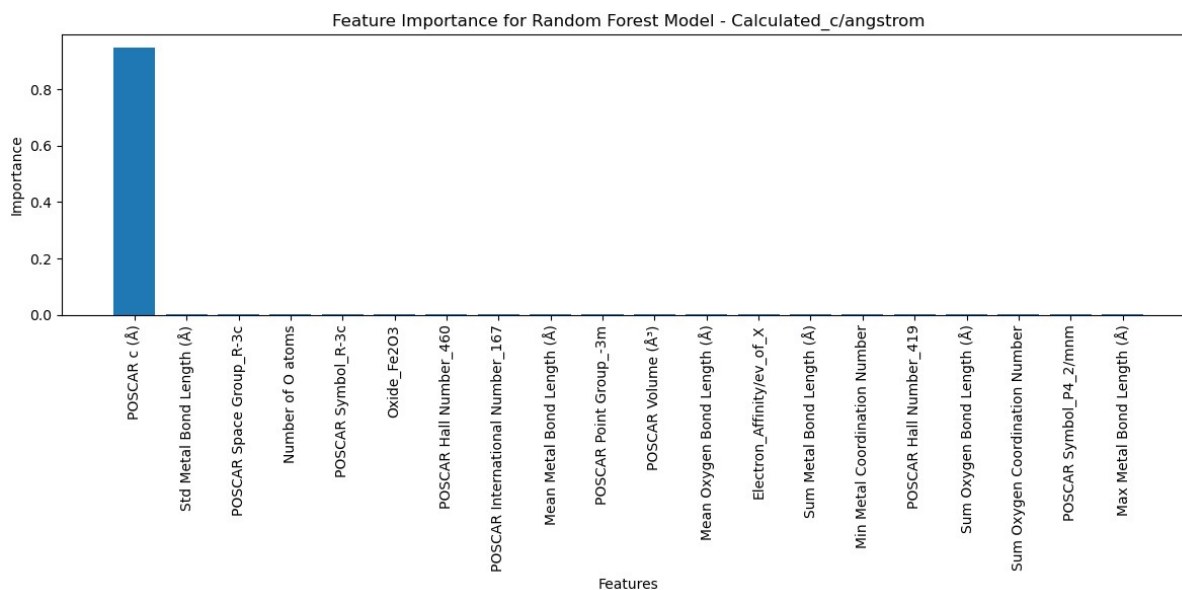

**Figure S79.** Feature importance analysis from the RFR Model for predicting the rPBE lattice constant (c) across thirty-eight (38) metal oxides.

| MP-ID           | Formula     | Crystal System    | Space Group     | Space Group Number |
|-----------------|-------------|-------------------|-----------------|--------------------|
| mp-19128        | CoO         | Hexagonal         | P6_3mc          | 186                |
| mp-19770        | Fe2O3       | Trigonal          | R-3c            | 167                |
| <i>mp-1986</i>  | <i>ZnO</i>  | <i>Cubic</i>      | <i>F-43m</i>    | <i>216</i>         |
| <i>mp-20194</i> | <i>CeO2</i> | <i>Cubic</i>      | <i>Fm-3m</i>    | <i>225</i>         |
| mp-2133         | ZnO         | Hexagonal         | P6_3mc          | 186                |
| mp-2229         | ZnO         | Cubic             | Fm-3m           | 225                |
| mp-22408        | CoO         | Cubic             | F-43m           | 216                |
| mp-2574         | ZrO2        | Tetragonal        | P4_2/nmc        | 137                |
| <i>mp-2657</i>  | <i>TiO2</i> | <i>Tetragonal</i> | <i>P4_2/mnm</i> | <i>136</i>         |
| mp-1093993      | ZnO         | Tetragonal        | P4_2/mnm        | 136                |
| mp-1102744      | ZnO2        | Orthorhombic      | P2_12_12_1      | 19                 |
| mp-1178232      | FeO         | Monoclinic        | C2/m            | 12                 |
| mp-1178247      | FeO         | Trigonal          | P31c            | 159                |
| mp-1190186      | ZrO2        | Orthorhombic      | Pbca            | 61                 |
| mp-1439         | TiO2        | Orthorhombic      | Pbcn            | 60                 |
| <i>mp-1565</i>  | <i>ZrO2</i> | <i>Cubic</i>      | <i>Fm-3m</i>    | <i>225</i>         |
| mp-1840         | TiO2        | Orthorhombic      | Pbca            | 61                 |
| mp-19009        | NiO         | Cubic             | Fm-3m           | 225                |
| mp-2858         | ZrO2        | Monoclinic        | P2_1/c          | 14                 |
| mp-352          | HfO2        | Monoclinic        | P2_1/c          | 14                 |
| <i>mp-390</i>   | <i>TiO2</i> | <i>Tetragonal</i> | <i>I4_1/amd</i> | <i>141</i>         |
| mp-715514       | V2O3        | Monoclinic        | C2/c            | 15                 |

|                |             |              |             |     |
|----------------|-------------|--------------|-------------|-----|
| <i>mp-8484</i> | <i>ZnO2</i> | <i>Cubic</i> | <i>Pa-3</i> | 205 |
| mp-720166      | V2O5        | Monoclinic   | C2/m        | 12  |
| mp-510568      | V2O5        | Monoclinic   | P2_1/m      | 11  |
| mp-754670      | V2O5        | Orthorhombic | Pmmn        | 59  |
| mp-25279       | V2O5        | Orthorhombic | Pmmn        | 59  |
| mp-19443       | WO3         | Tetragonal   | P4/nmm      | 129 |
| mp-636148      | WO3         | Monoclinic   | P2_1/c      | 14  |
| mp-545665      | WO3         | Hexagonal    | P6/mmm      | 191 |
| mp-19390       | WO3         | Cubic        | Pm-3m       | 221 |
| mp-19033       | WO3         | Monoclinic   | P2_1/c      | 14  |
| mp-2235359     | WO3         | Tetragonal   | P-42_1m     | 113 |
| mp-18773       | WO3         | Tetragonal   | P4/ncc      | 130 |
| mp-741         | HfO2        | Orthorhombic | Pnma        | 62  |
| mp-550893      | HfO2        | Cubic        | Fm-3m       | 225 |
| mp-1018721     | HfO2        | Tetragonal   | P4_2/nmc    | 137 |
| mp-1858        | HfO2        | Orthorhombic | Pbca        | 61  |
